# Supplementary material for: Pd-catalyzed dehydrogenative C–H activation of iminyl hydrogen with the indole C3–H and C2–H bond: an elegant synthesis of indeno[1,2-b]indoles and indolo[1,2-a]indoles
Source: Royal Society of Chemistry journal article supplement (doi:10.1039/c4ra16661b), 2015-01-01

# **Pd-catalyzed dehydrogenative C–H activation of iminyl hydrogen with indole C3-H and C2-H bond: An elegant synthesis of indeno[1,2-*b*]indoles and indolo[1,2-*a*]indoles**

*Somjit Hazra, Biplab Mondal, Rajendra Narayan De, and B Roy\**

## **Supporting information**

### **Contents**

|    |                                                           |      |
|----|-----------------------------------------------------------|------|
| 1. | General                                                   | 2    |
| 2. | a. Optimization of indole C2- arylations                  | 2    |
|    | b. Intramolecular dehydrogenative cross coupling reaction | 3-4  |
| 3. | Copies of spectra                                         | 5-71 |

## 1. General:

Melting points were determined in open capillaries and are uncorrected. IR spectra ( $\nu_{\max}$  in  $\text{cm}^{-1}$ ) were recorded on a Perkin-Elmer L 120-000A spectrometer on KBr disks.  $^1\text{H}$  NMR and  $^{13}\text{C}$  NMR spectra were recorded on a Bruker DPX-400 spectrometer in  $\text{CDCl}_3$  with TMS as internal standard (chemical shift in  $\delta$ ). Chemical shifts of common trace PMR impurities ( $\text{CDCl}_3$ , ppm) in some samples:  $\text{H}_2\text{O}$ , 1.56; solvent impurities: 1.26, 0.86;  $\text{CHCl}_3$ , 7.26. In some low polar samples  $^{13}\text{C}$  peak was observed at 29.7 ( $\delta_{\text{C}}$ ) corresponding to solvent greasy impurities. CHN was recorded on 2400 series II CHN analyzer Perkin Elmer instrument. MS were recorded on a Q-TOF micro<sup>TM</sup> instrument. Silica gel [(60-120, 230-400 mesh), Rankem, India] was used for chromatographic separation. Silica gel G [CDH, (India)] was used for TLC. Petroleum ether refers to the fraction boiling between 60 °C and 80 °C.

### 2.a. Table 1: Optimization of C2-arylations of *N*-ethyl indole:

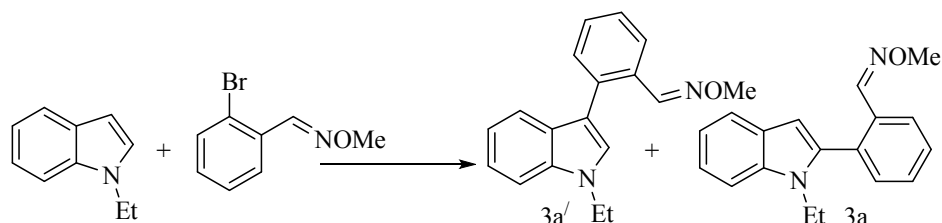

| Entry | Catalyst (1mol%)          | Ligand <sup>a,b</sup> | Solvent          | Temp   | Con(%) | Yield [%] <sup>c</sup> |    |
|-------|---------------------------|-----------------------|------------------|--------|--------|------------------------|----|
|       |                           |                       |                  |        |        | 3a'                    | 3a |
| 1     | $\text{Pd}(\text{OAc})_2$ | -                     | DMF              | 130 °C | 71     | 30                     | 40 |
| 2     | $\text{Pd}(\text{OAc})_2$ | -                     | <i>o</i> -xylene | 130 °C | 20     | 25                     | 41 |
| 3     | $\text{Pd}(\text{OAc})_2$ | -                     | Dioxane          | 100 °C | 45     | 29                     | 34 |
| 4     | $\text{Pd}(\text{OAc})_2$ | -                     | DMA              | 130 °C | 81     | 28                     | 42 |
| 5     | $\text{Pd}(\text{OAc})_2$ | 1                     | DMA              | 130 °C | 100    | 27                     | 52 |
| 6     | $\text{Pd}(\text{OAc})_2$ | 2                     | DMA              | 130 °C | 84     | 31                     | 37 |
| 7     | $\text{Pd}(\text{OAc})_2$ | 3                     | DMA              | 130 °C | 72     | 23                     | 41 |
| 8     | $\text{Pd}(\text{OAc})_2$ | 1                     | DMA              | 90 °C  | 61     | 32                     | 43 |
| 9     | $\text{Pd}(\text{OAc})_2$ | 1                     | DMA              | 145 °C | 100    | 22                     | 41 |

<sup>a</sup> Ligands are 1= $\text{PPh}_3$ , 2=Xantphos, 3=1,10-Phenanthroline, <sup>b</sup>  $\text{CsOAc}$  was used as base. <sup>c</sup> yield were calculated after column chromatography.

Starting from Sames *et. al.* procedure,<sup>1</sup> we tried to optimize the C2-arylation reaction by varying ligands, solvents and temperature. We found DMA as solvent, gave the best conversion. We tried 3 ligands, among them  $\text{PPh}_3$  acted most proficiently (Table 1, entry 5). The optimum temperature was found to be 130 °C. When the reaction was carried out in 90 °C (Table 1, entry 8) the conversion and the ratio of 3a/3a' is low. At higher temperature the yield reduced slightly (Table 1, entry 9).

## 2.b. Table 2. Optimization of intramolecular dehydrogenative cross coupling reaction

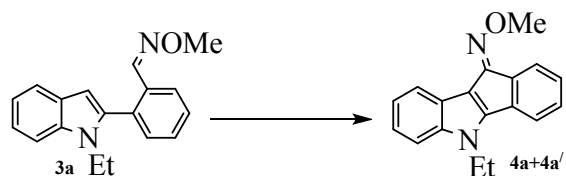

| Entry | Catalyst <sup>a</sup>                 | Additive                                     | Solvent  | Yield[%] <sup>b</sup> |
|-------|---------------------------------------|----------------------------------------------|----------|-----------------------|
| 1     | Pd(OAc) <sub>2</sub>                  | Cu(OAc) <sub>2</sub>                         | DMF      | 70                    |
| 2     | Pd(OAc) <sub>2</sub>                  | PhI(OAc) <sub>2</sub>                        | DMF      | 65                    |
| 3     | Pd(OAc) <sub>2</sub>                  | AgOAc                                        | DMF      | 76                    |
| 4     | Pd(OAc) <sub>2</sub>                  | K <sub>2</sub> S <sub>2</sub> O <sub>8</sub> | DMF      | 82                    |
| 5     | Pd(OAc) <sub>2</sub>                  | K <sub>2</sub> S <sub>2</sub> O <sub>8</sub> | Toluene  | 15                    |
| 6     | Pd(OAc) <sub>2</sub>                  | K <sub>2</sub> S <sub>2</sub> O <sub>8</sub> | o-xylene | 36                    |
| 7     | Pd(OAc) <sub>2</sub>                  | K <sub>2</sub> S <sub>2</sub> O <sub>8</sub> | Dioxane  | 53                    |
| 8     | Pd(OAc) <sub>2</sub>                  | K <sub>2</sub> S <sub>2</sub> O <sub>8</sub> | DMA      | 85                    |
| 9     | Pd <sub>2</sub> (dba) <sub>3</sub>    | K <sub>2</sub> S <sub>2</sub> O <sub>8</sub> | DMA      | NR                    |
| 10    | PdCl <sub>2</sub>                     | K <sub>2</sub> S <sub>2</sub> O <sub>8</sub> | DMA      | 80                    |
| 11    | Pd(MeCN) <sub>2</sub> Cl <sub>2</sub> | K <sub>2</sub> S <sub>2</sub> O <sub>8</sub> | DMA      | 60                    |
| 12    | Cu(OTf) <sub>2</sub> <sup>c</sup>     | -                                            | DMA      | 22                    |

Reaction condition: 2-arylated indoloxime (1 equiv.), Pd(OAc)<sub>2</sub> (5 mol%), K<sub>2</sub>S<sub>2</sub>O<sub>8</sub> (1equiv.), stirred at 110 °C in DMA. a) Catalyst used 5 mol% b) Yields were calculated after flash chromatography. c) Cu(OTf)<sub>2</sub> was used in 1 equiv. N.R = no reaction. Reaction time = 1.5-3h (reaction was monitored by TLC).

Initially the reaction was conducted in DMF using Pd(OAc)<sub>2</sub> (5 mol%) and Cu(OAc)<sub>2</sub> (1equiv.) as oxidizing agent at 110 °C. We observed the formation of the cross coupling product with a yield of 70% (Table 2, entry 1). Interestingly, both geometrical isomers (**4a** and **4a'**) was detected. However, only the major isomer was successfully purified. The minor isomer was obtained as a contaminant with the major isomer. Other oxidizing agents were also tried but the best yield (82%) was obtained with K<sub>2</sub>S<sub>2</sub>O<sub>8</sub> (Table

2, entry 4), although the yield with AgOAc (Table 2, entry 3) was also very good (76%). We then screened some other solvents for this transformation. We found the polar solvents to respond much better compared to the non-polar ones. However, dioxane (Table 2, entry 7) gave only modest yield (53%) and the yields were very low with toluene and *o*-xylene (Table 2, entry 5, 6). Interestingly, DMA gave the best yield (85%) and the reaction was completed within 2 hours (Table 2, entry 8). As expected, Pd<sub>2</sub>dba<sub>3</sub> [Pd (0)] was not effective (Table 2, entry 9) for the transformation while PdCl<sub>2</sub> gave very good yield (80%). The reaction was found to be less efficient with PdCl<sub>2</sub>(MeCN)<sub>2</sub> giving a combined yield of 60%. Reasoning that, the reaction is probably proceeding *via* electrophilic palladation in C3-position, we performed the reaction with an electrophilic copper salt [Cu(OTf)<sub>2</sub>]. Very interestingly, we observed the formation of the cross coupling product but instead of both geometrical isomers (**4a** and **4a'**), only a single isomer (the major isomer of previous reactions) was formed. However the yield was low in comparison with Pd salts (Table 2, entry 12) and the reaction was completed in 1.5 hours.

## Reference:

1. Lane, B. S.; Brown, M. A.; Sames, D. *J. Am. Chem. Soc.* **2005**, *127*, 8050.

**<sup>1</sup>H and <sup>13</sup>C NMR scan copies:  
2-(1-ethyl-1H-indol-3-yl)benzaldehyde O-methyl oxime (3a) :**

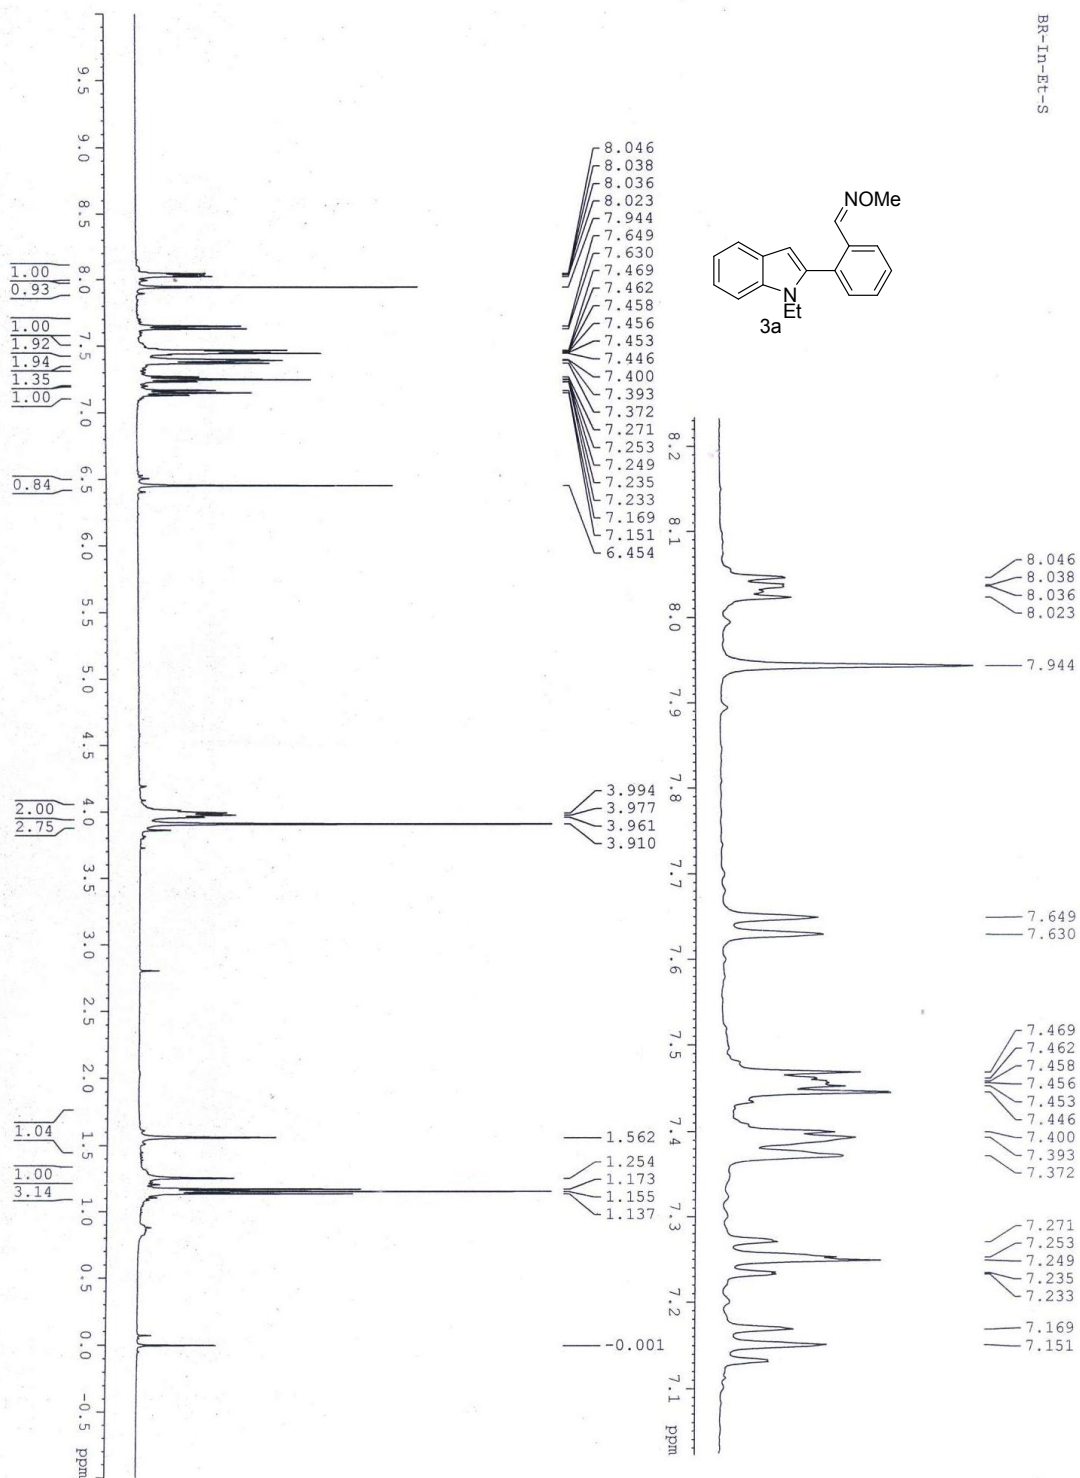

2-(1-ethyl-1H-indol-3-yl)benzaldehyde O-methyl oxime (3a):

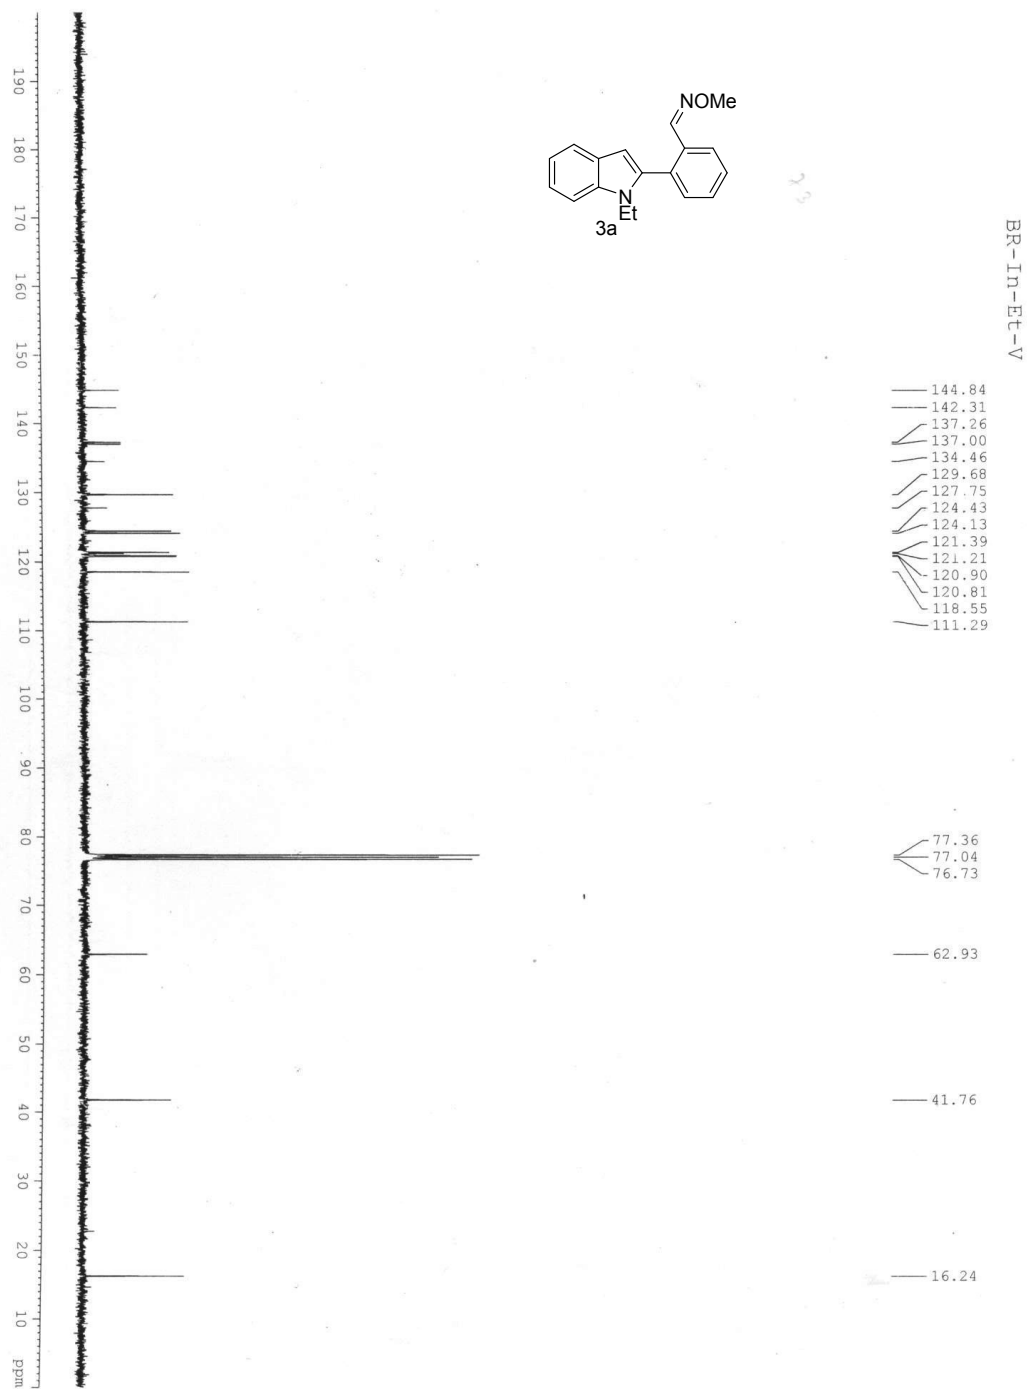

2-(1H-indol-2-yl)benzaldehyde O-methyl oxime (3b):

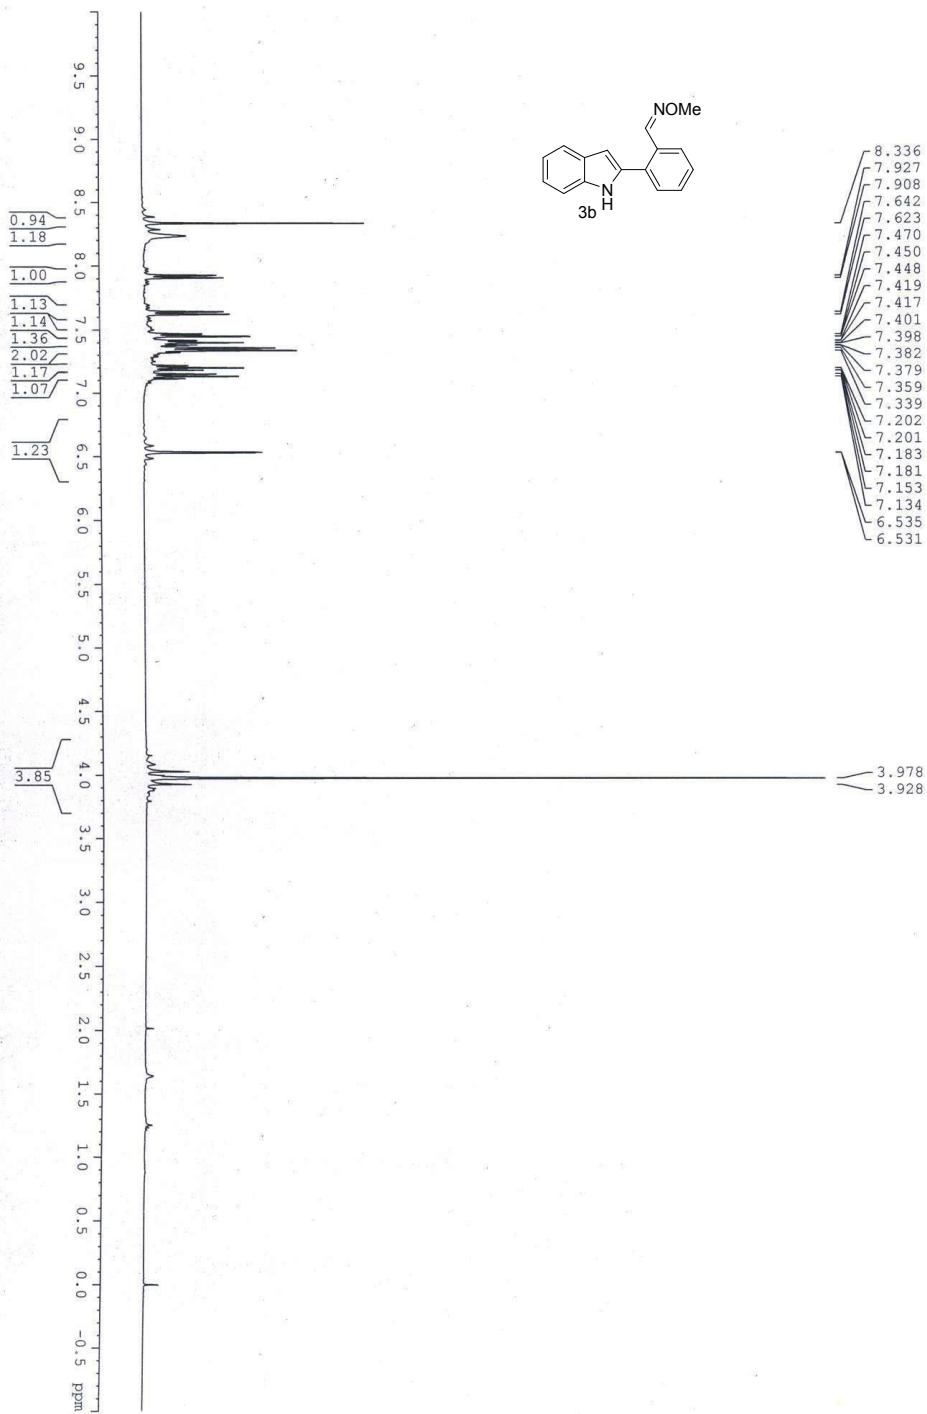

In-Bn-S

2-(1H-indol-2-yl)benzaldehyde O-methyl oxime (3b):

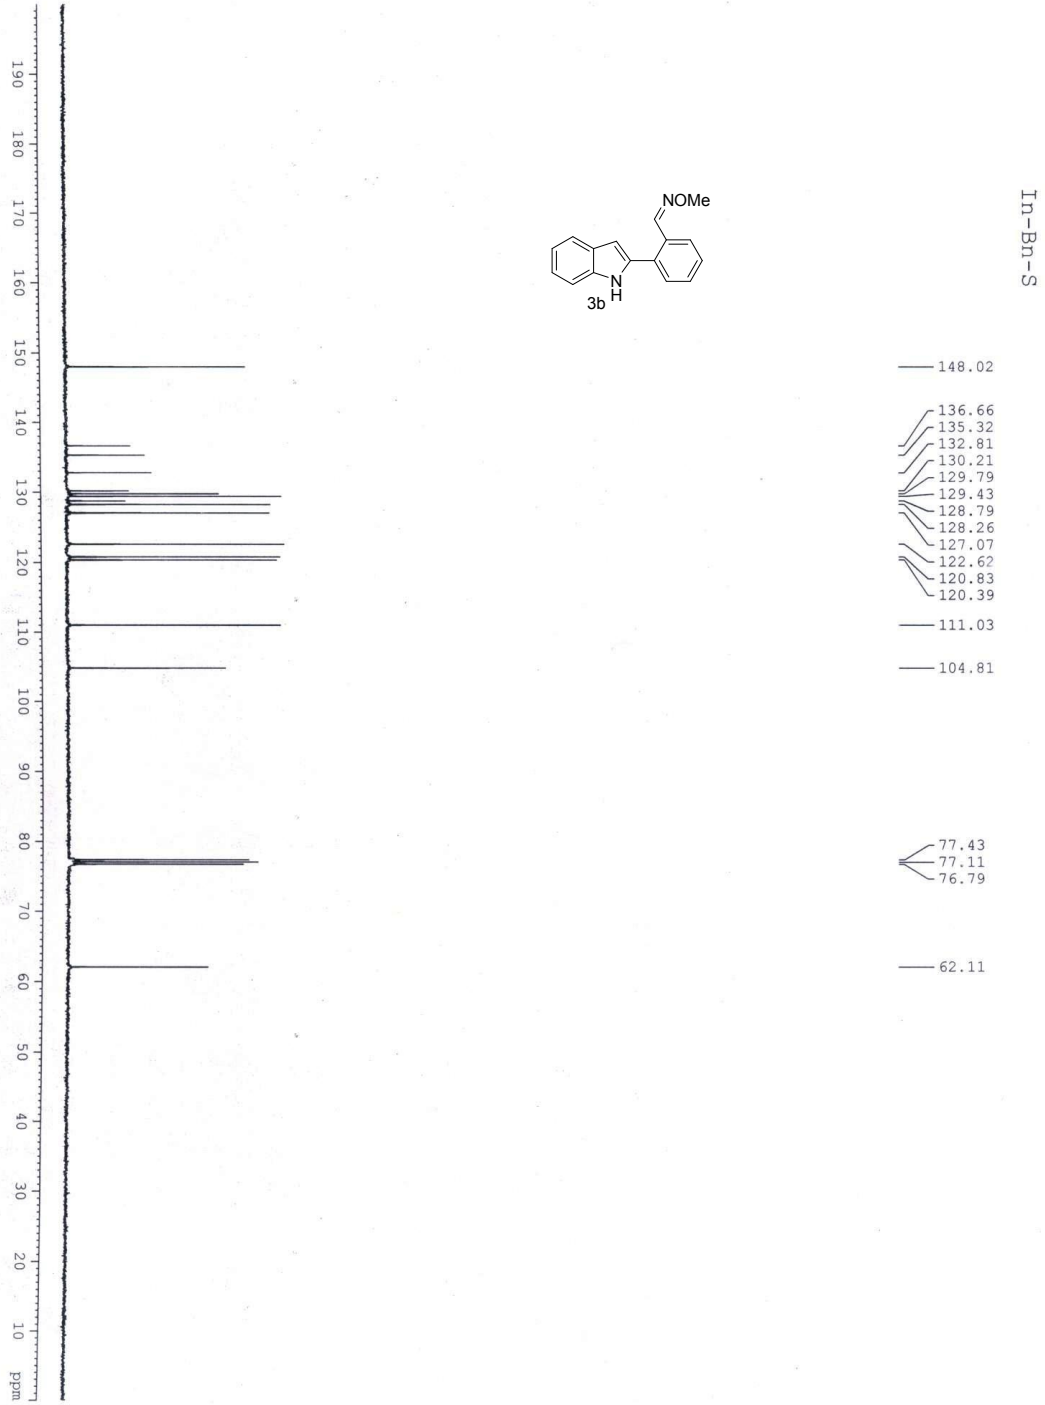



2-(1-ethyl-5-methoxy-1H-indol-2-yl)benzaldehyde O-methyl oxime (3c):

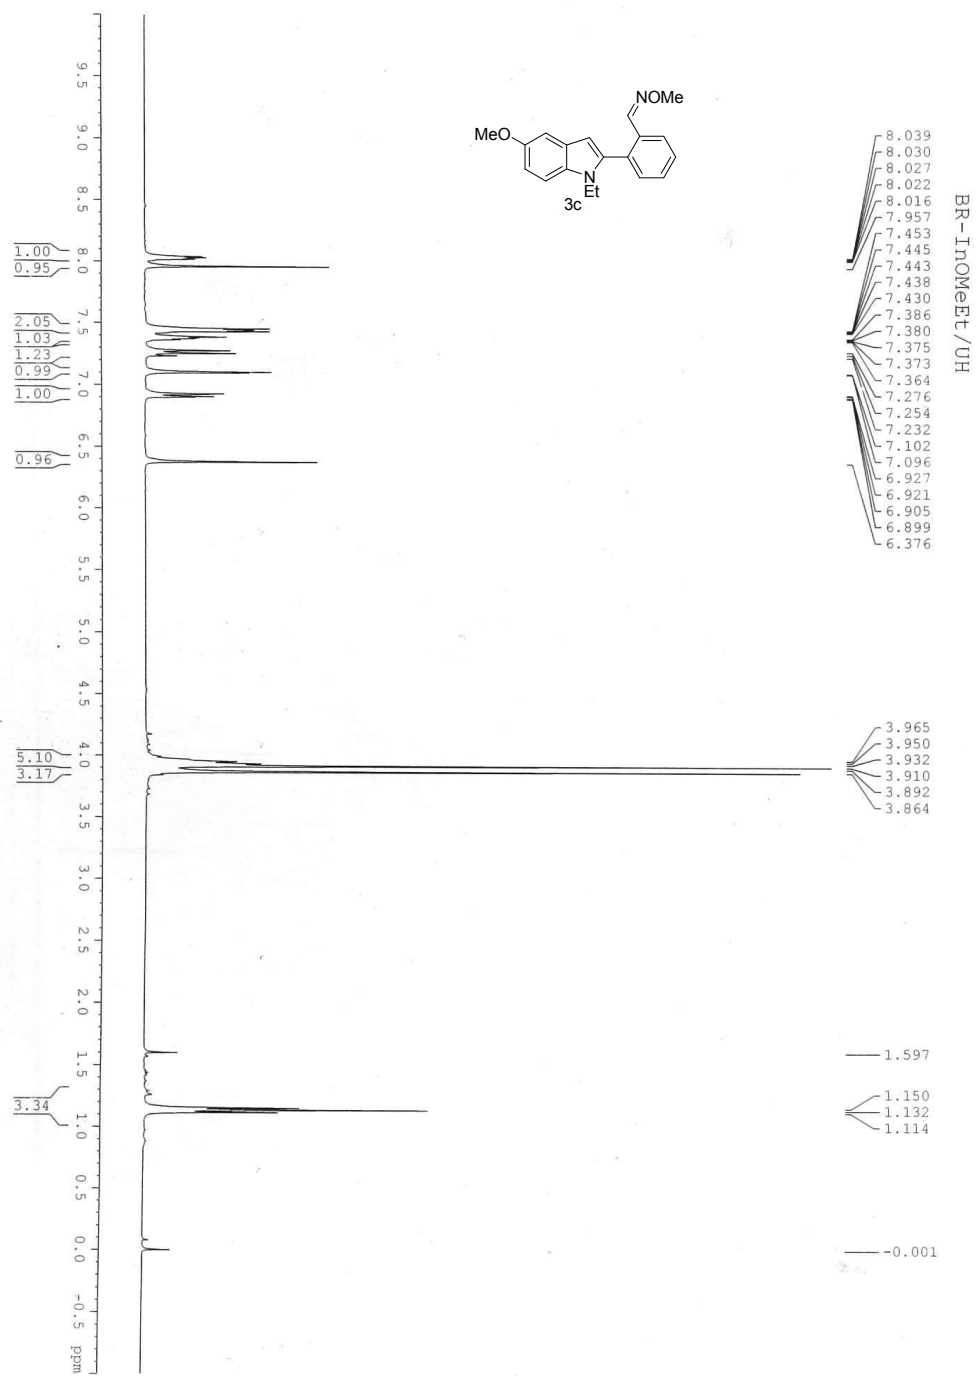

2-(1-ethyl-5-methoxy-1H-indol-2-yl)benzaldehyde O-methyl oxime (3c):

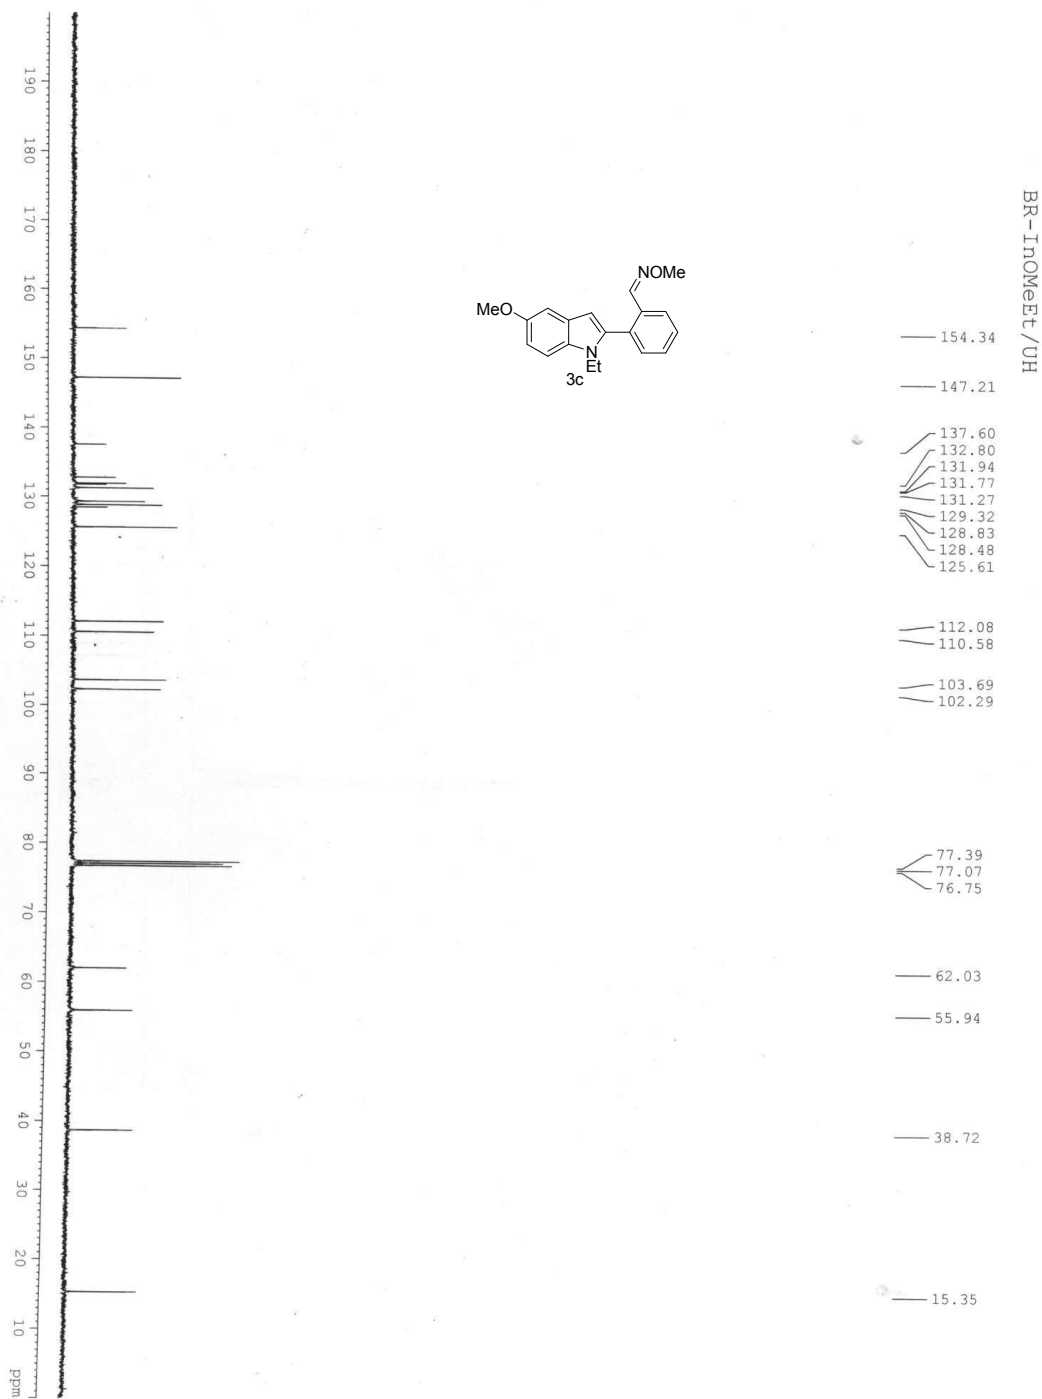

2-(1-ethyl-1H-indol-2-yl)-4,5-dimethoxybenzaldehyde O-methyl oxime (3d):

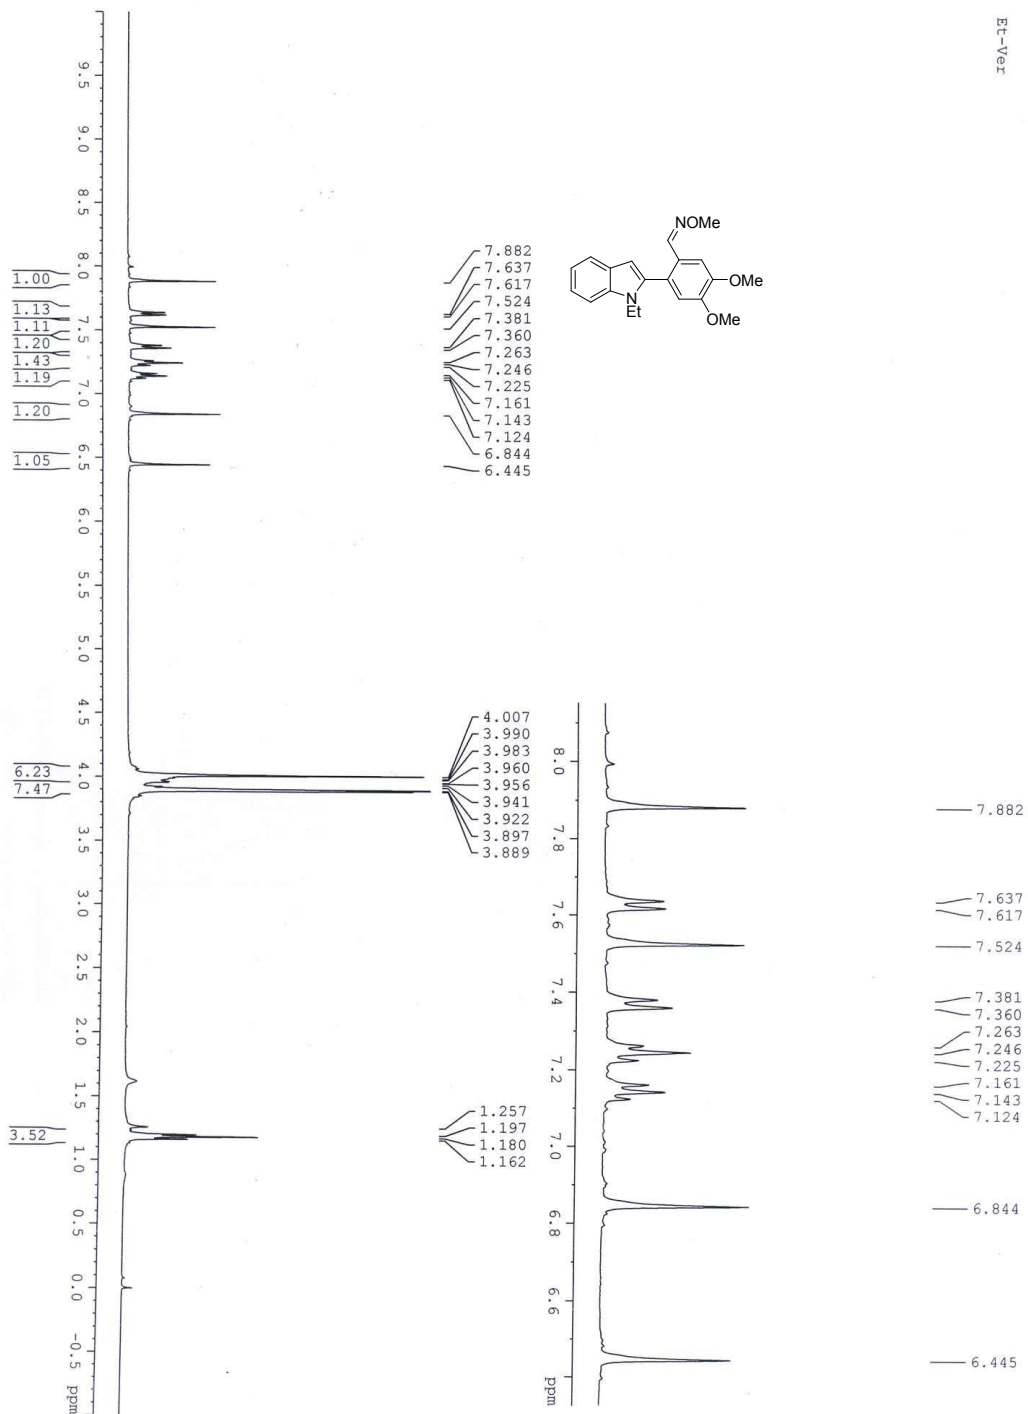

2-(1-ethyl-1H-indol-2-yl)-4,5-dimethoxybenzaldehyde O-methyl oxime (3d):

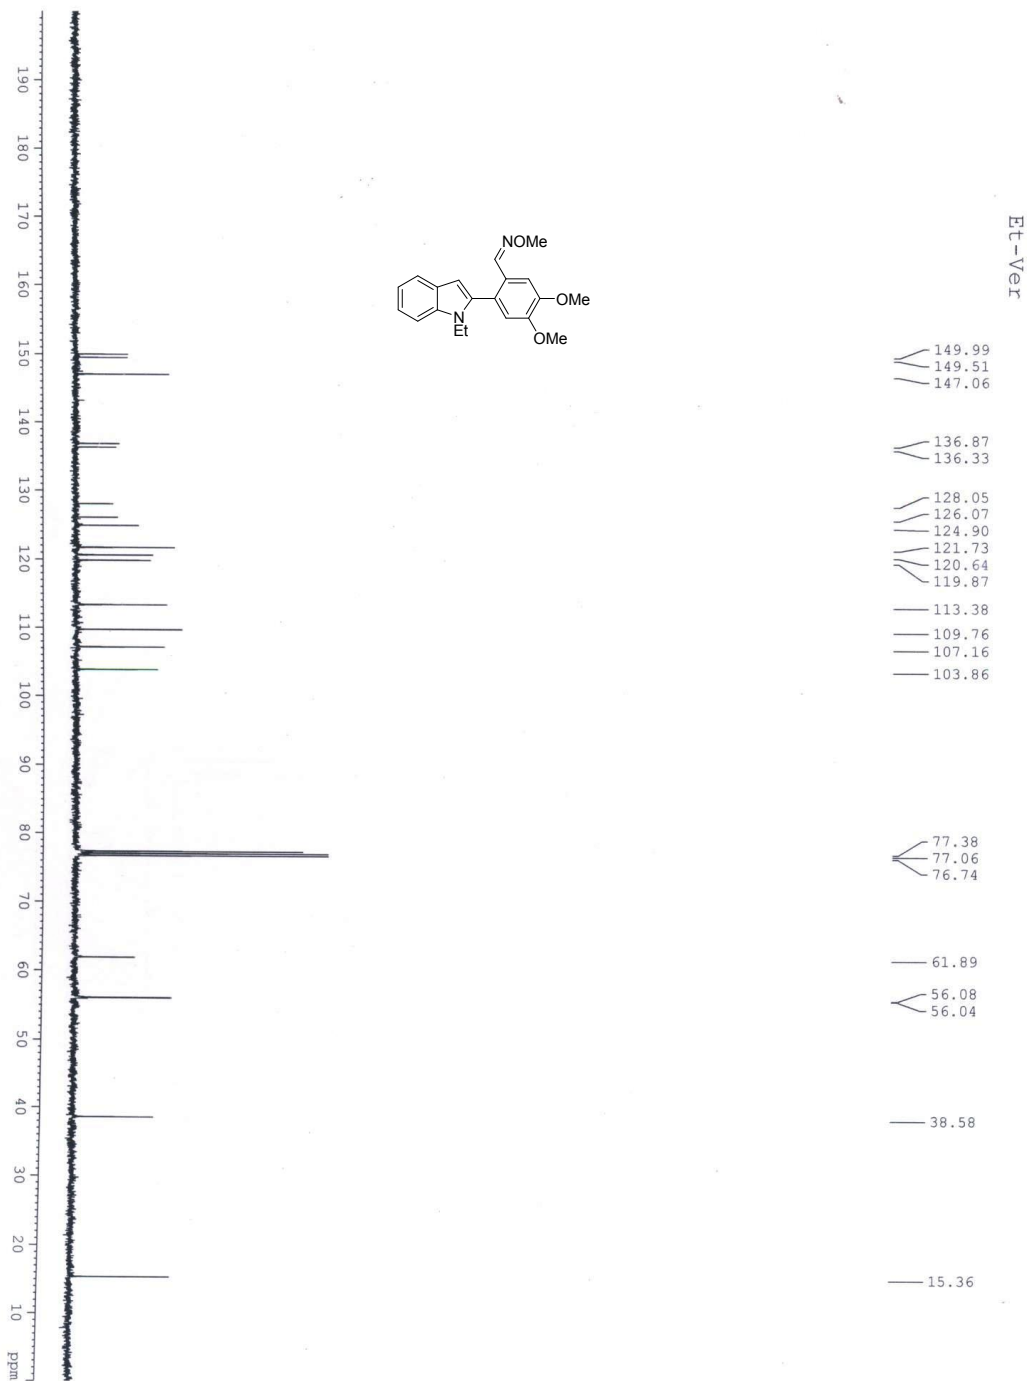

2-(1-methyl-1H-pyrrolo[2,3-b]pyridin-2-yl)benzaldehyde O-methyl oxime (3e) :

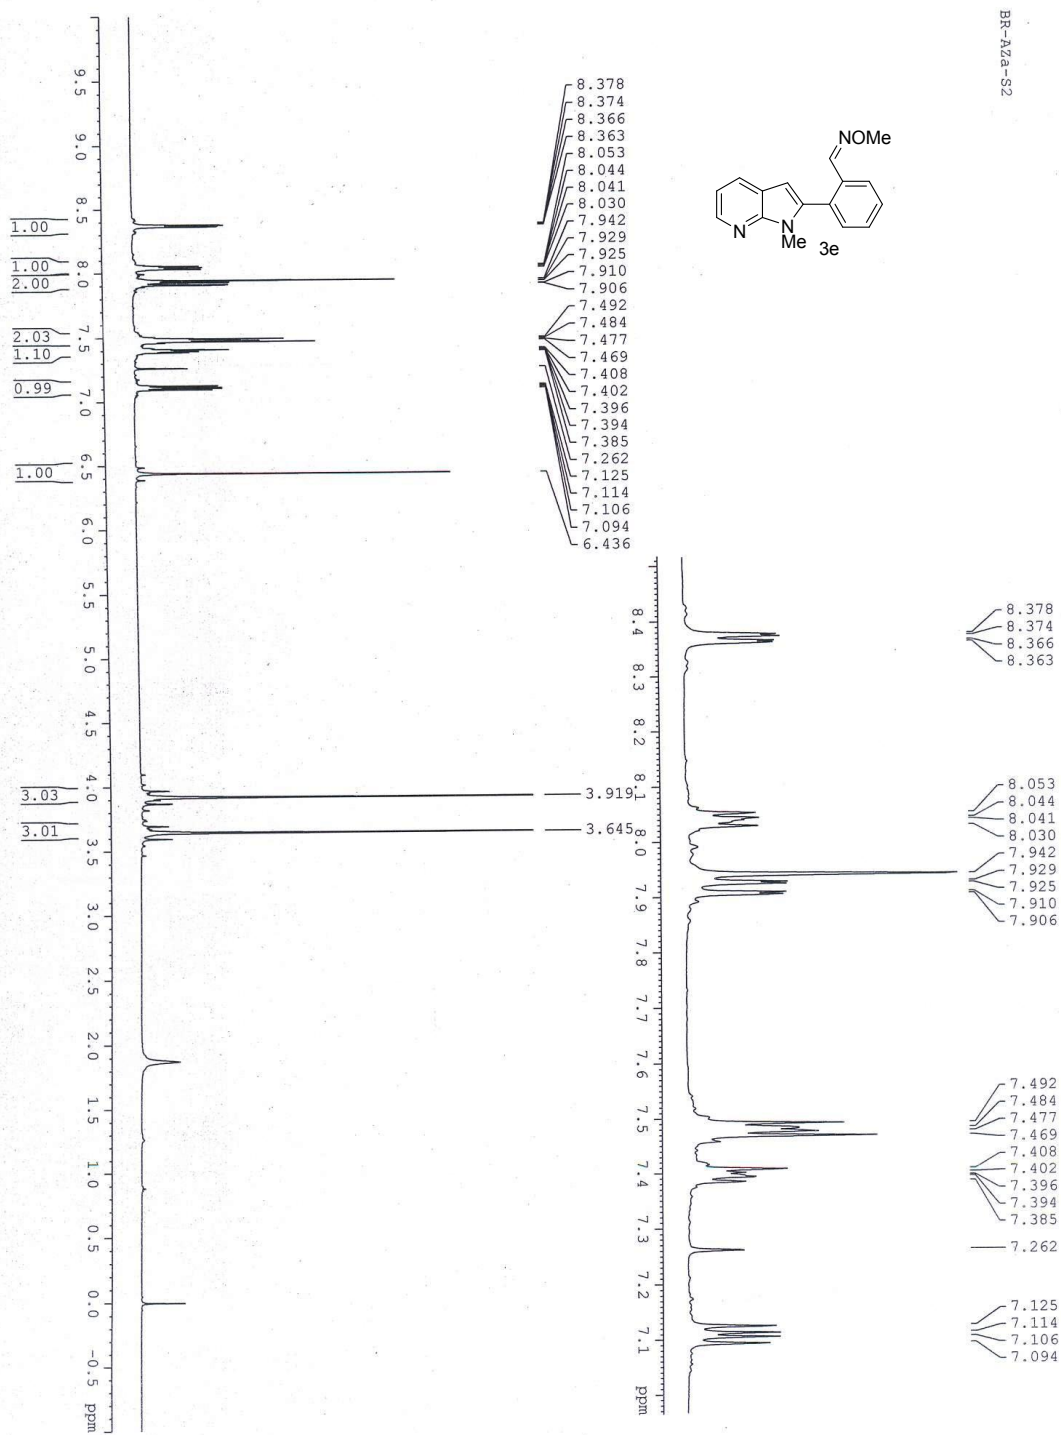

2-(1-methyl-1H-pyrrolo[2,3-b]pyridin-2-yl)benzaldehyde O-methyl oxime (3e) :

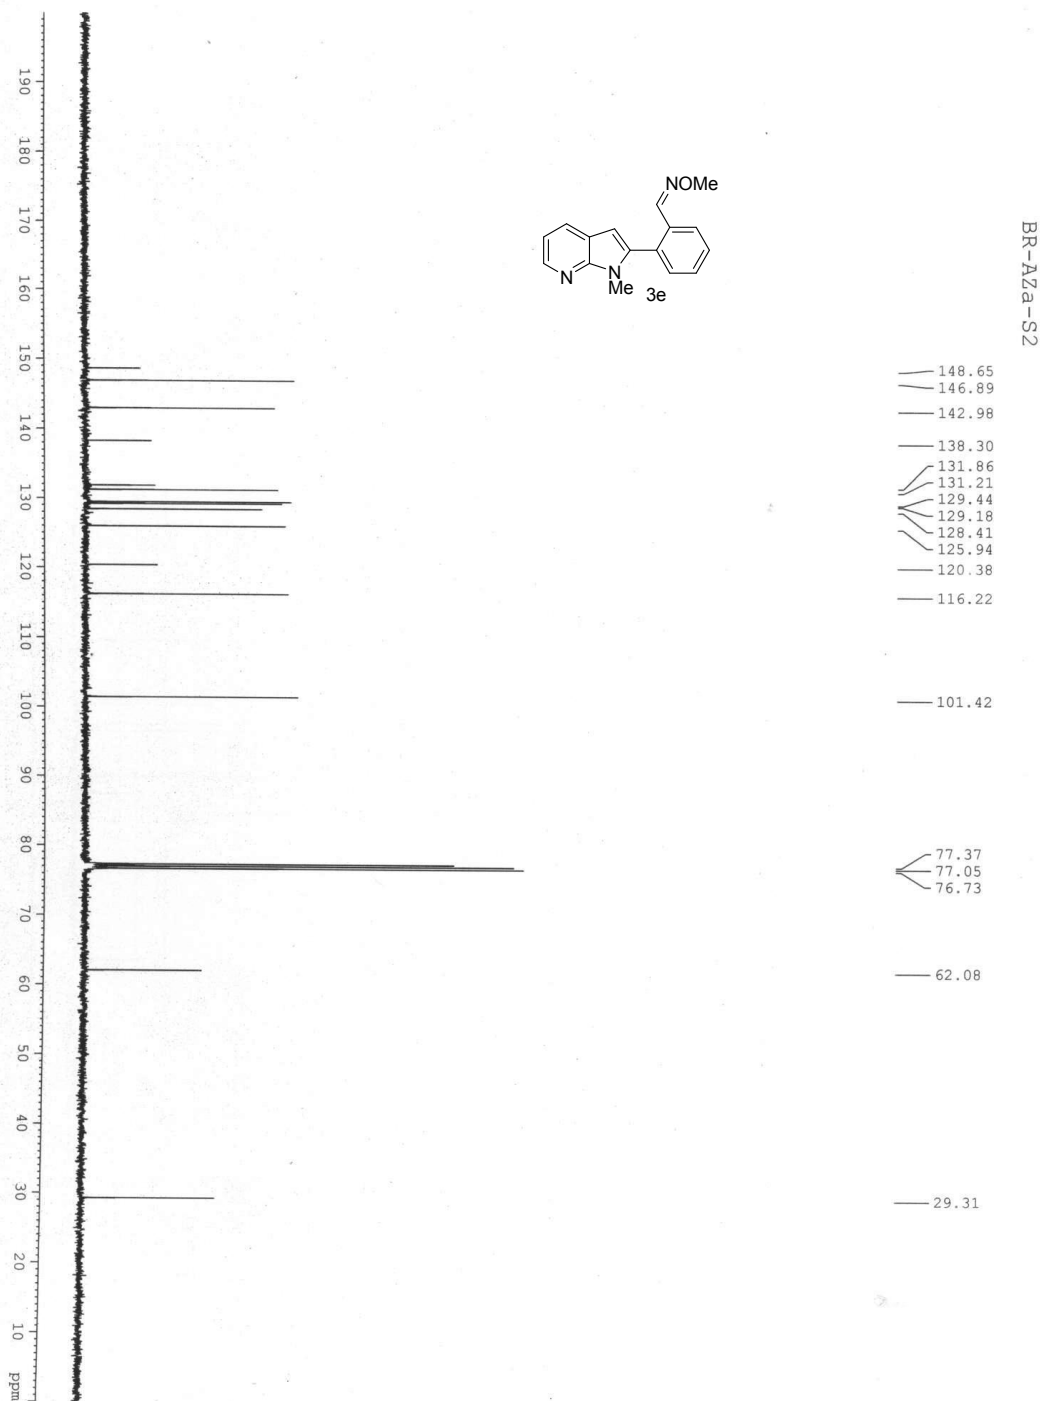

5-ethylindeno[1,2-b]indol-10(5H)-one O-methyl oxime (4a) :

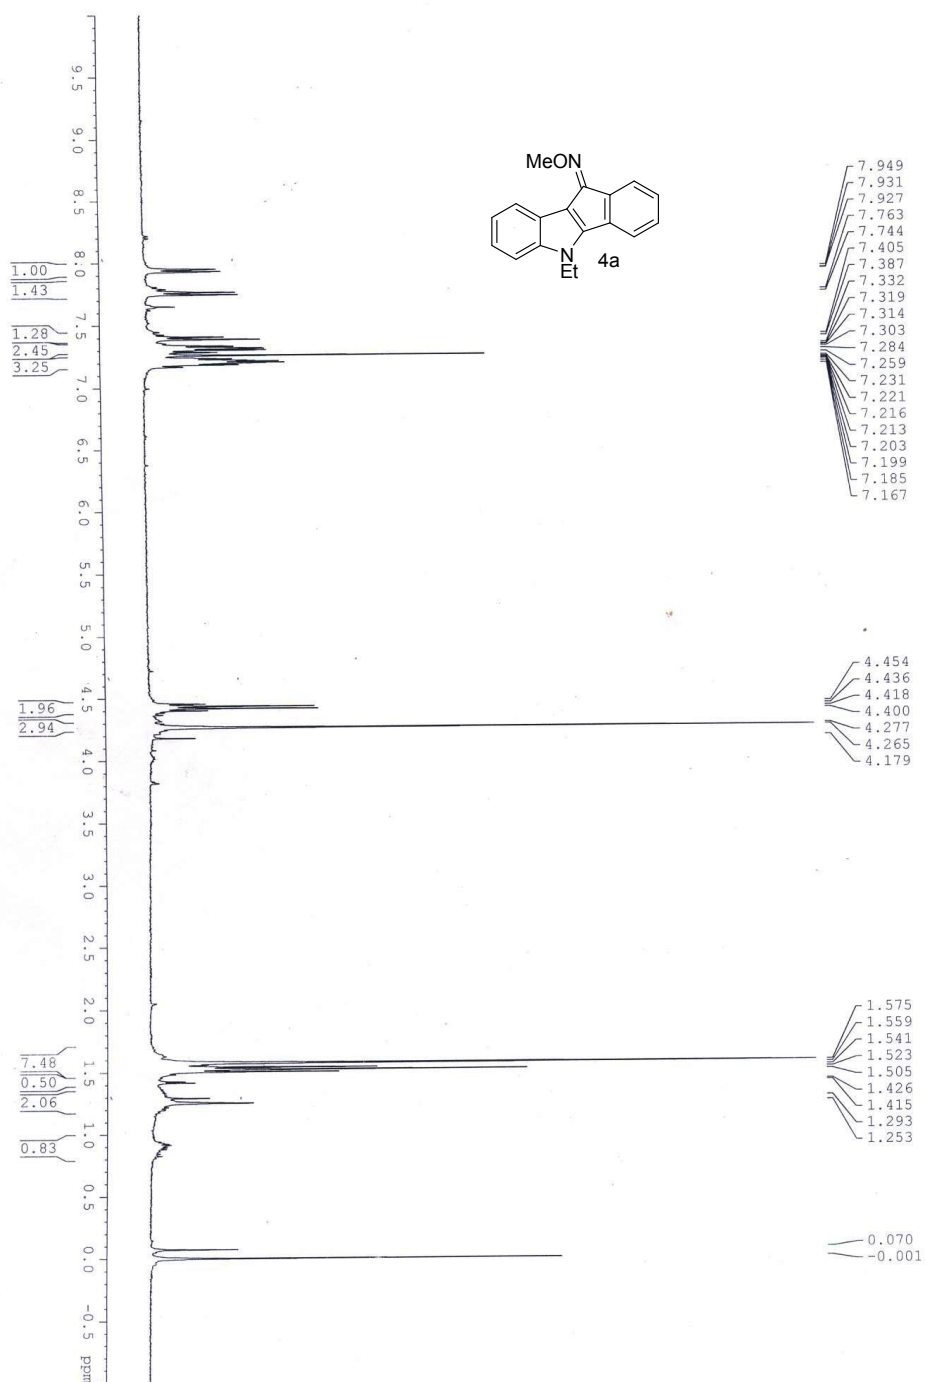

5-ethylindeno[1,2-b]indol-10(5H)-one O-methyl oxime (4a) :

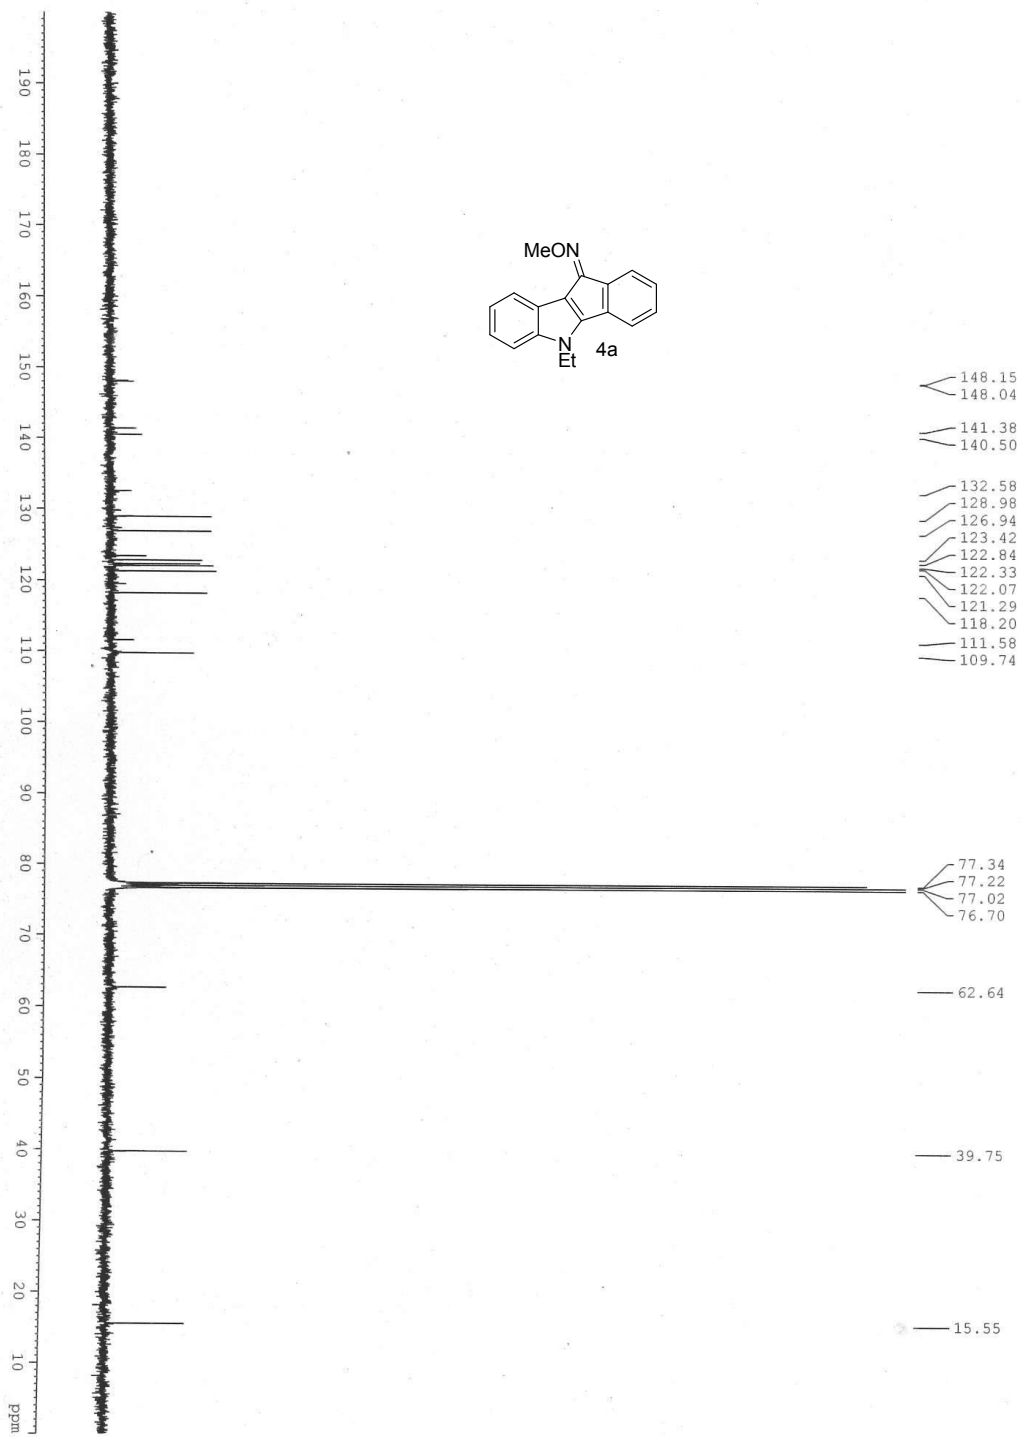



IN-ET-0

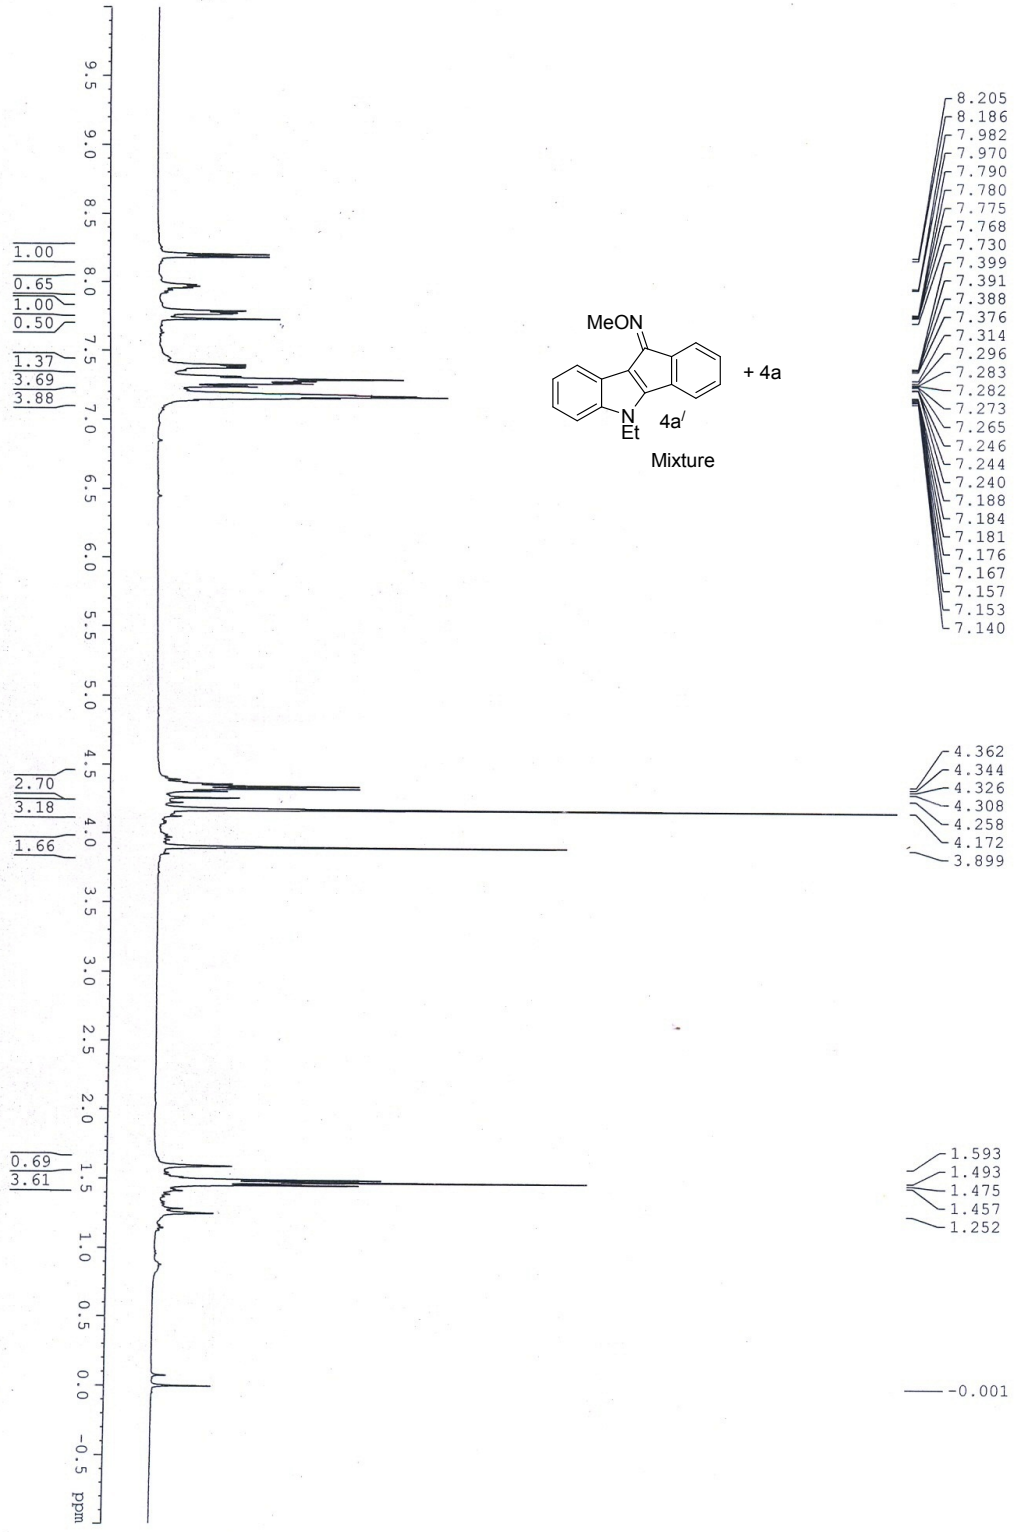

indeno[1,2-b]indol-10(5H)-one O-methyl oxime (4b):

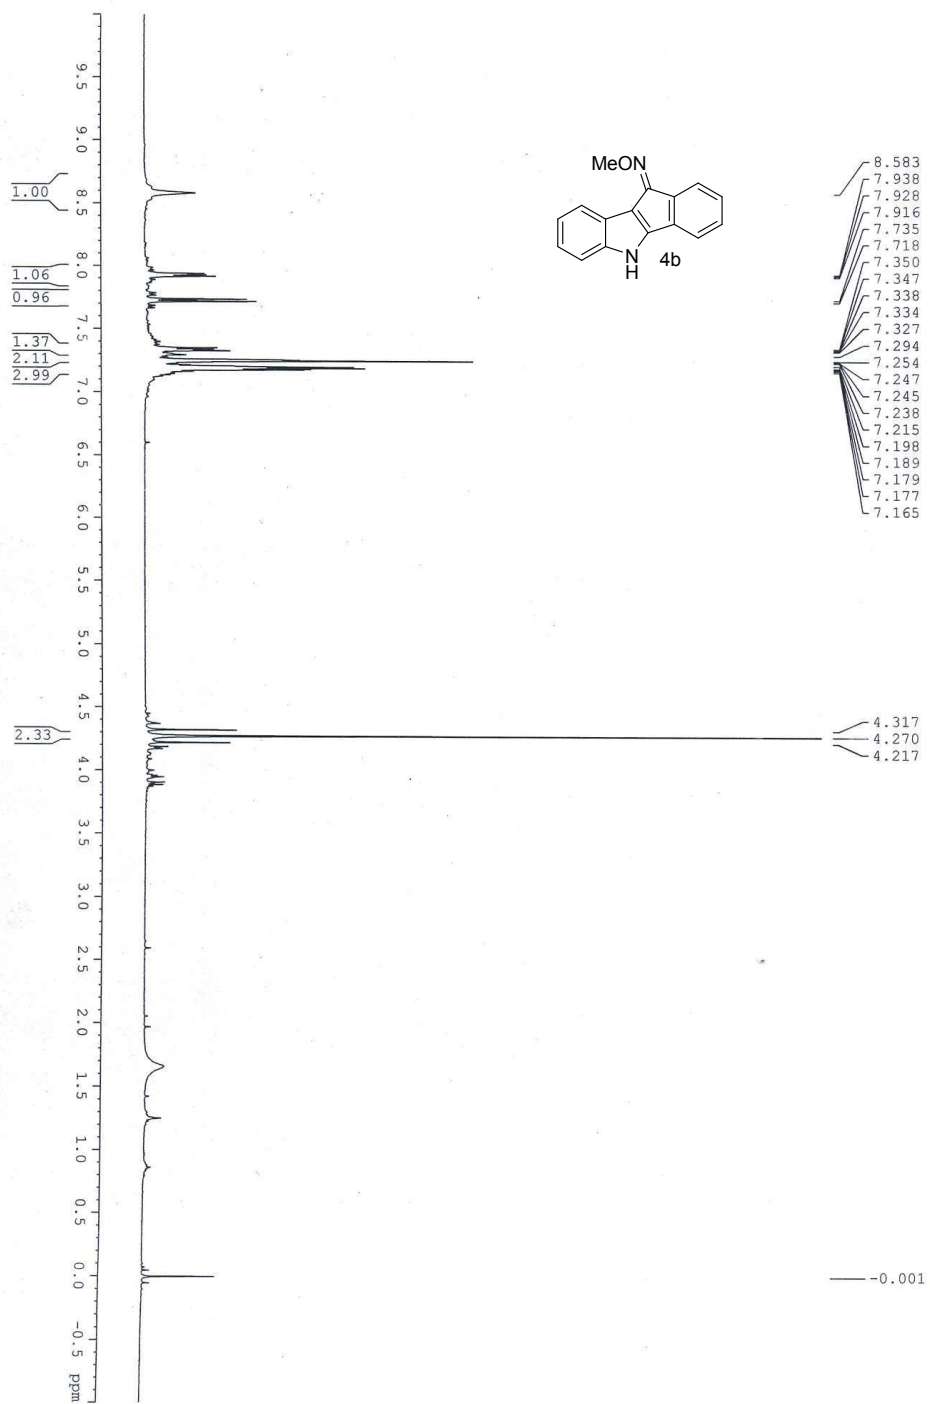

BR-In-H-P

indeno[1,2-b]indol-10(5H)-one O-methyl oxime (4b):

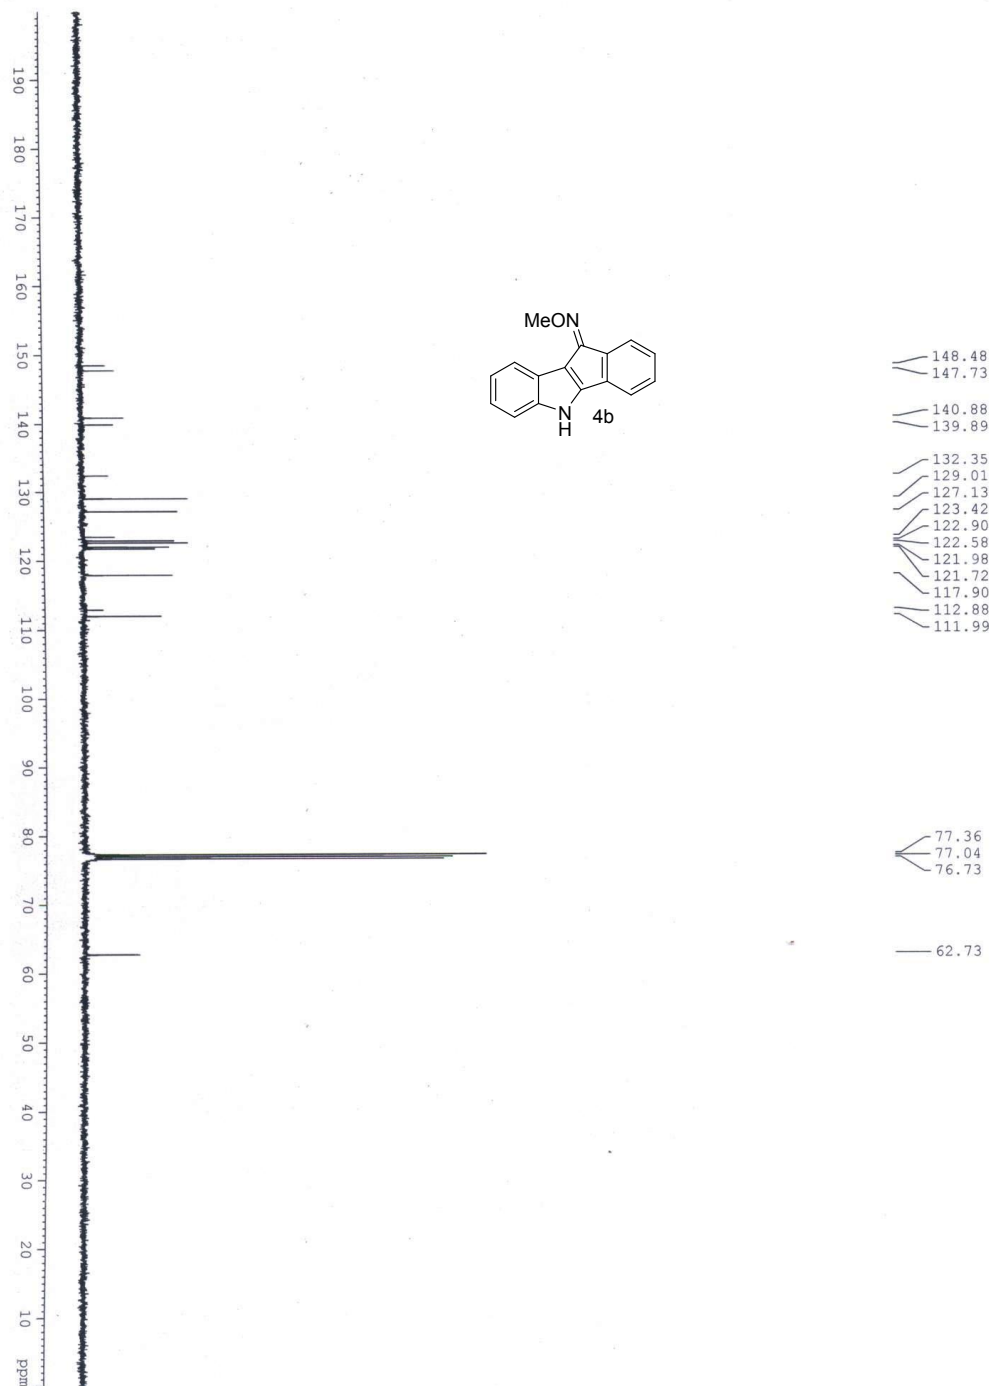

5-ethyl-8-methoxyindeno[1,2-b]indol-10(5H)-one O-methyl oxime (4c):

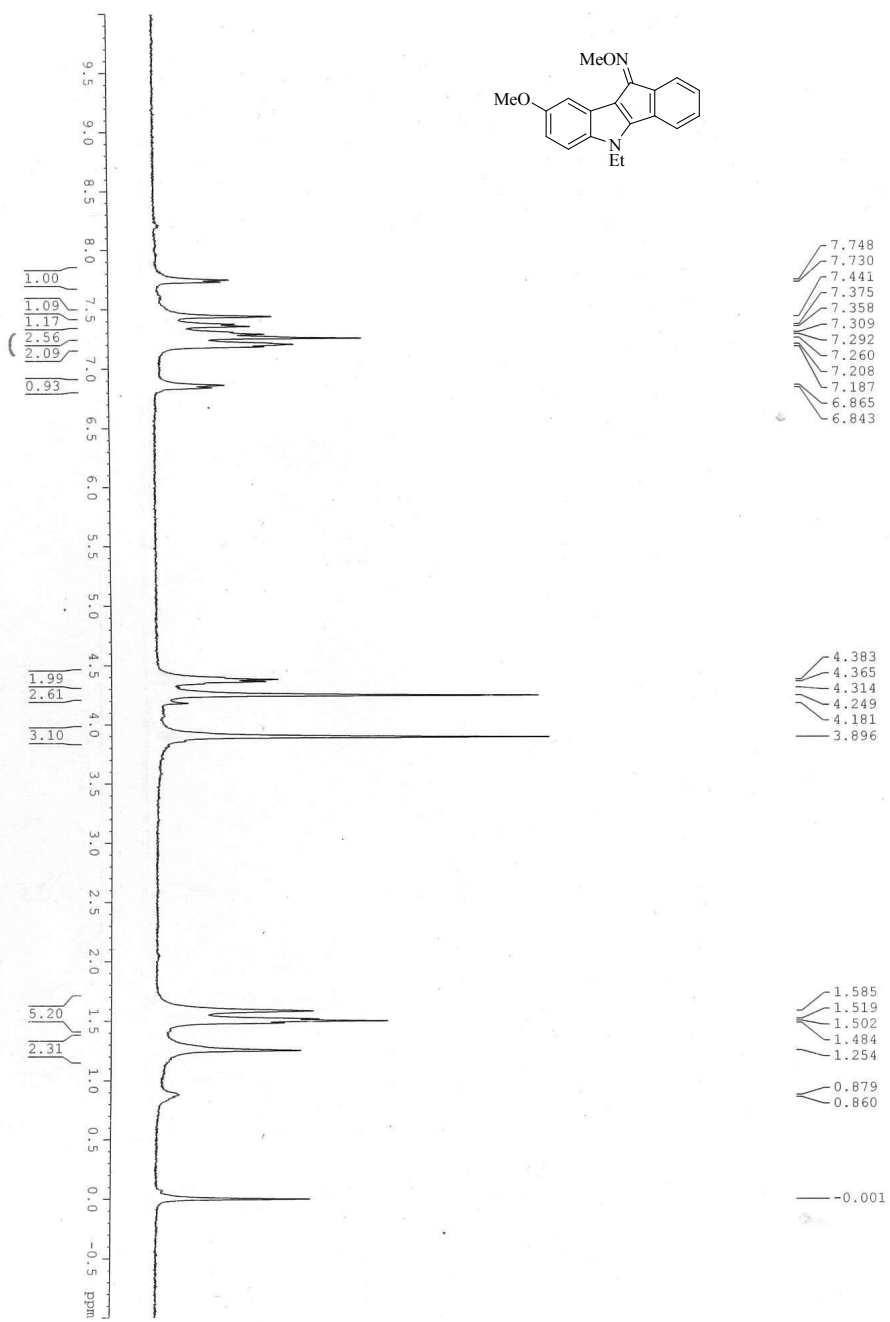

5-ethyl-8-methoxyindeno[1,2-b]indol-10(5H)-one O-methyl oxime (4c):

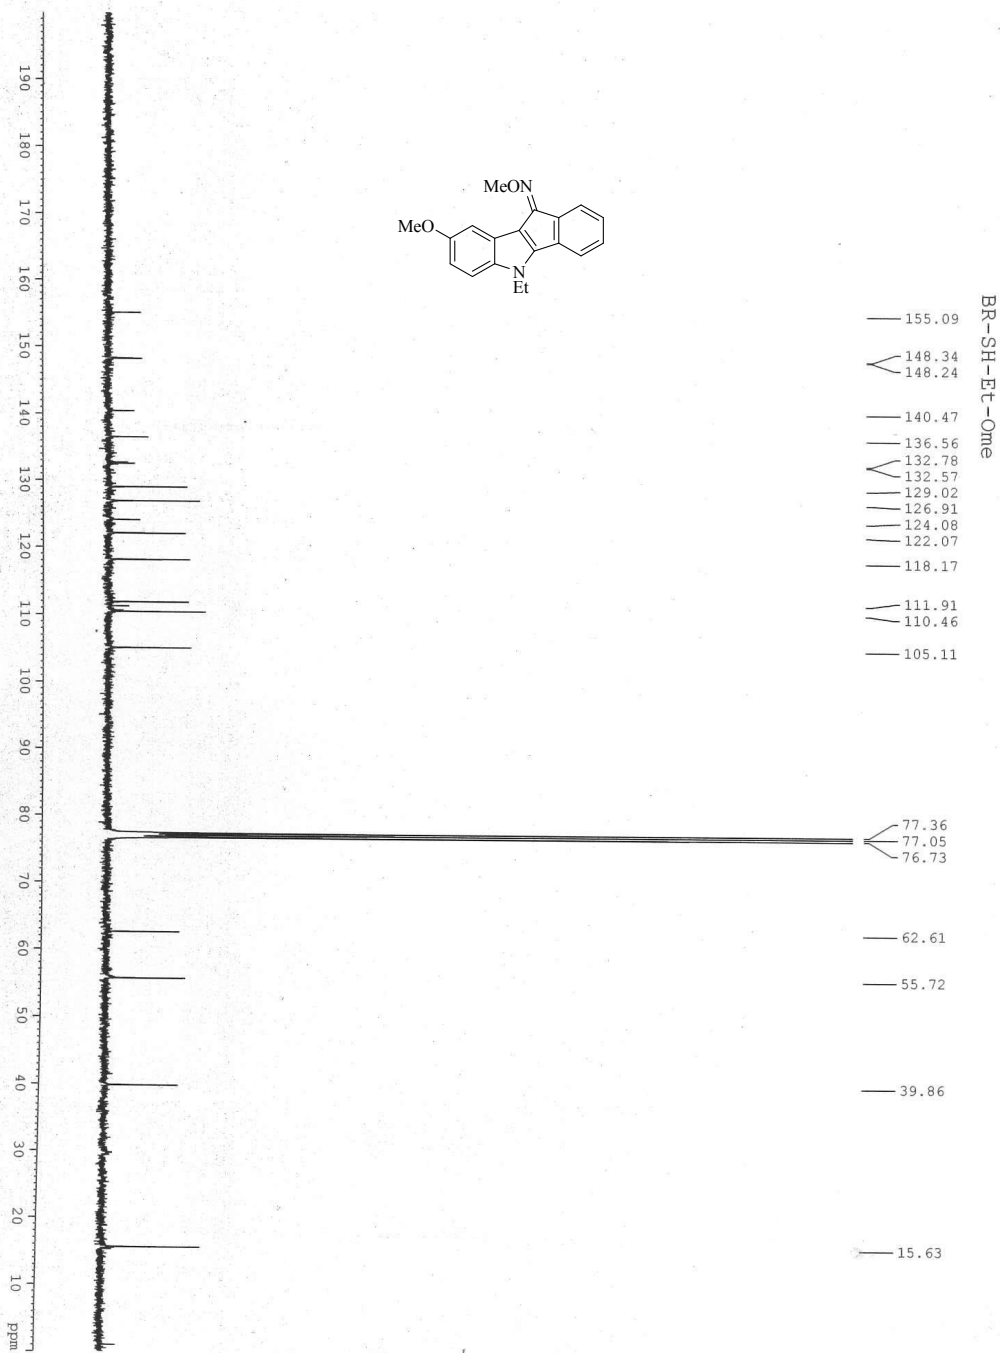

5-ethyl-2,3-dimethoxyindeno[1,2-b]indol-10(5H)-one O-methyl oxime (4d):

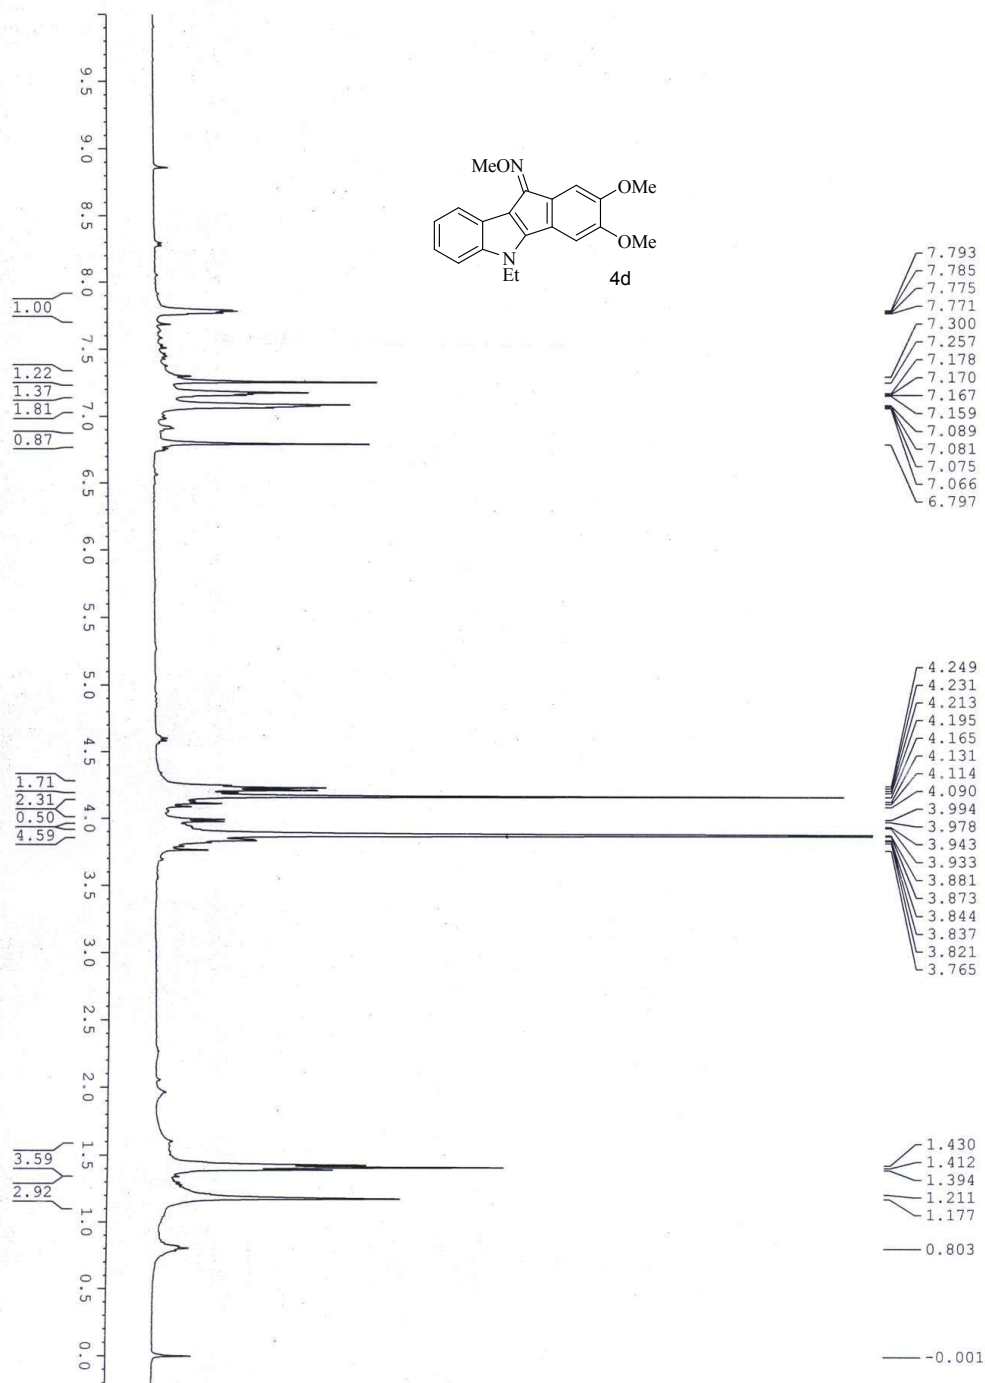

BR-SH-Et-Ver

5-ethyl-2,3-dimethoxyindeno[1,2-b]indol-10(5H)-one O-methyl oxime (4d):

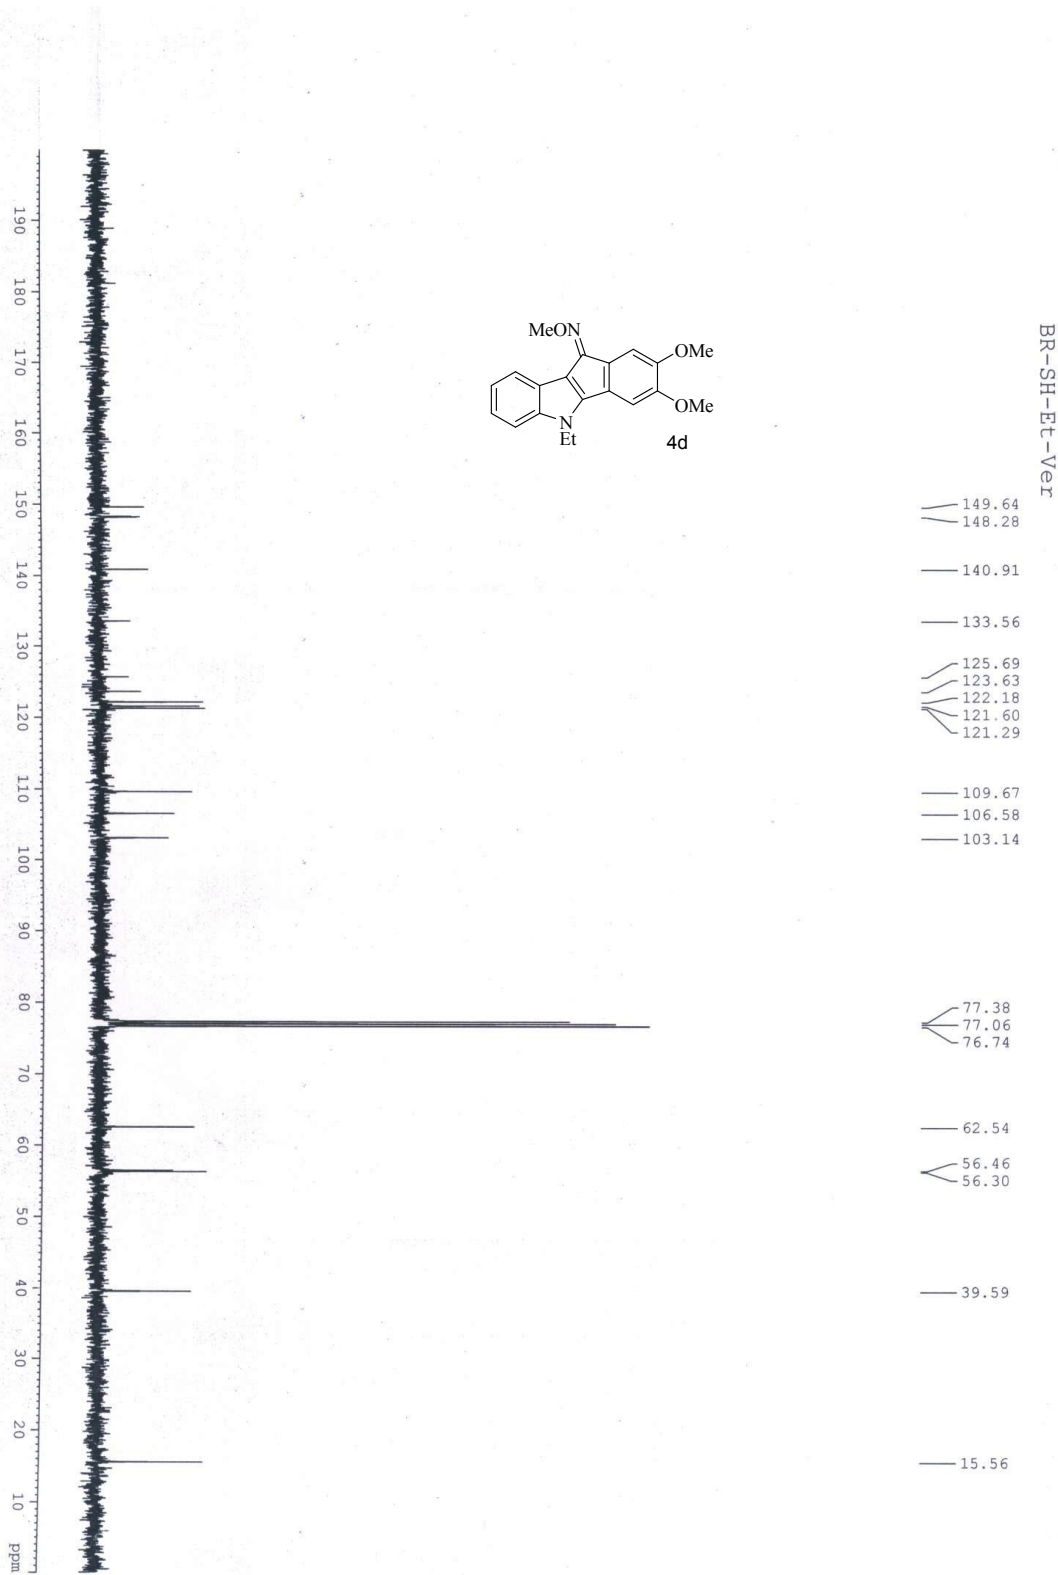

Compound (4e):

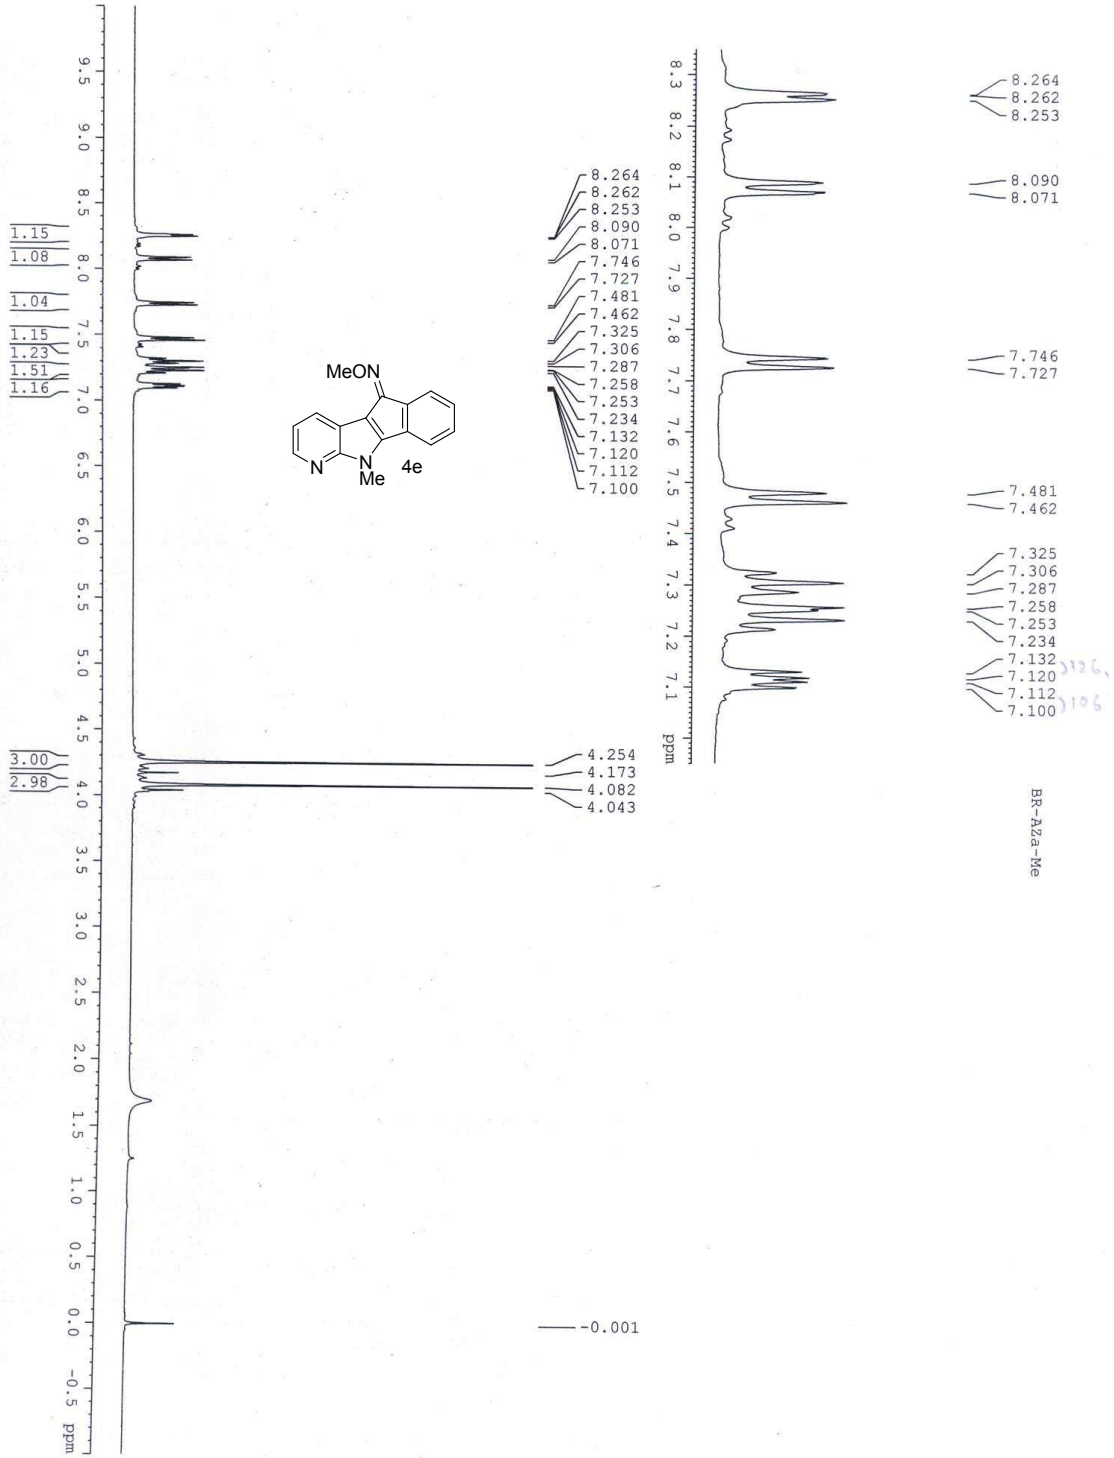



Compound (4e):

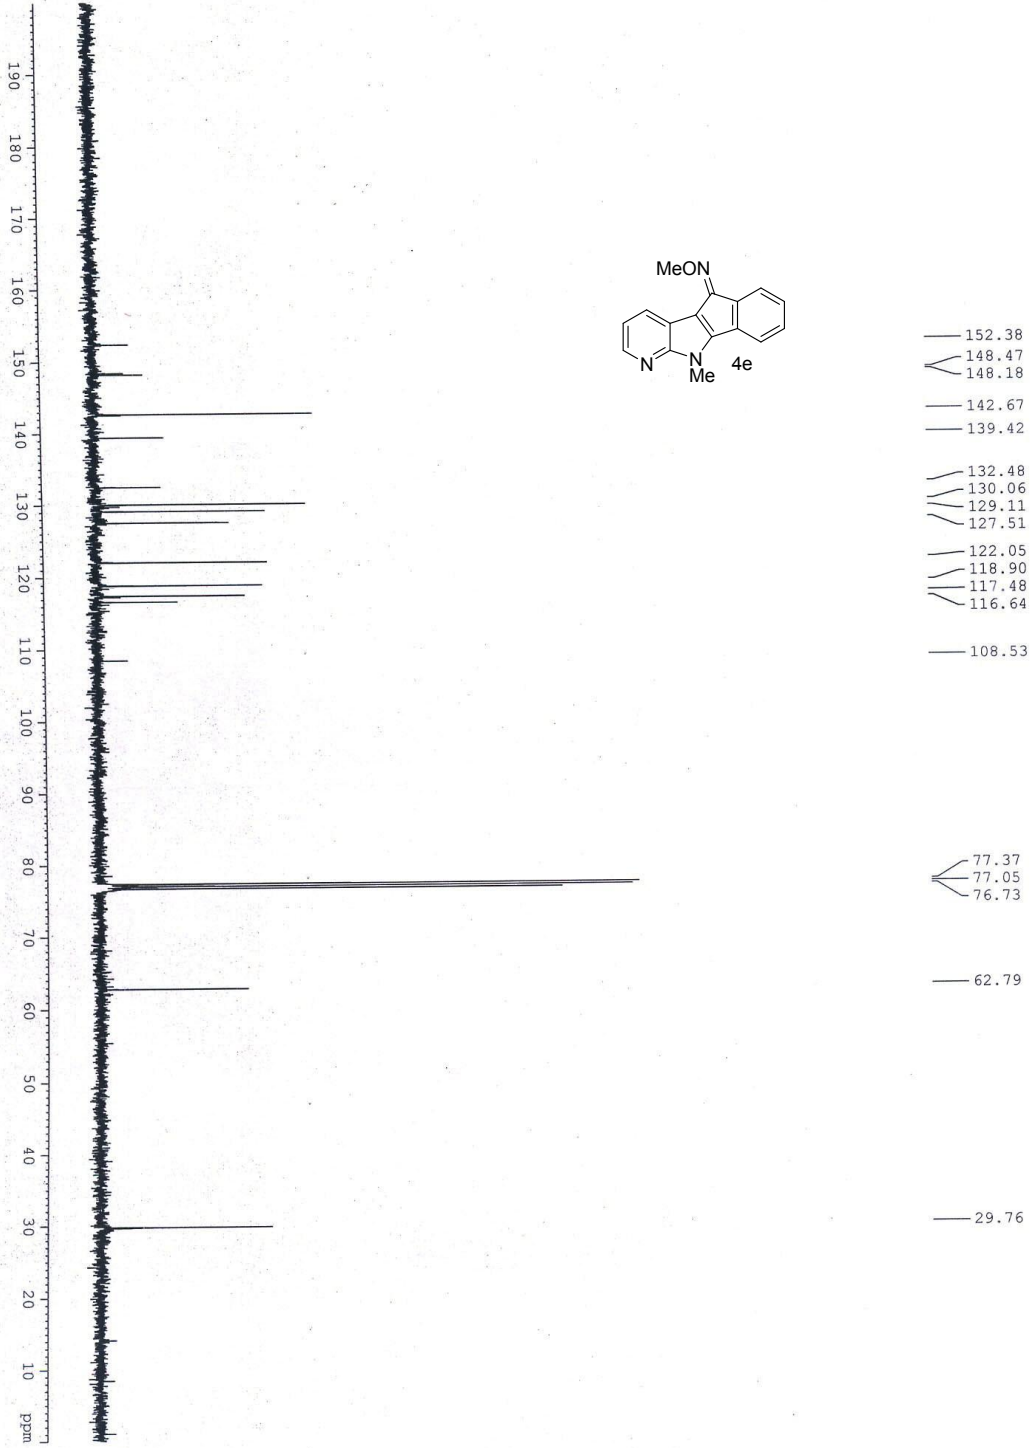

5-methylindeno[1,2-b]indol-10(5H)-one O-methyl oxime (4f):

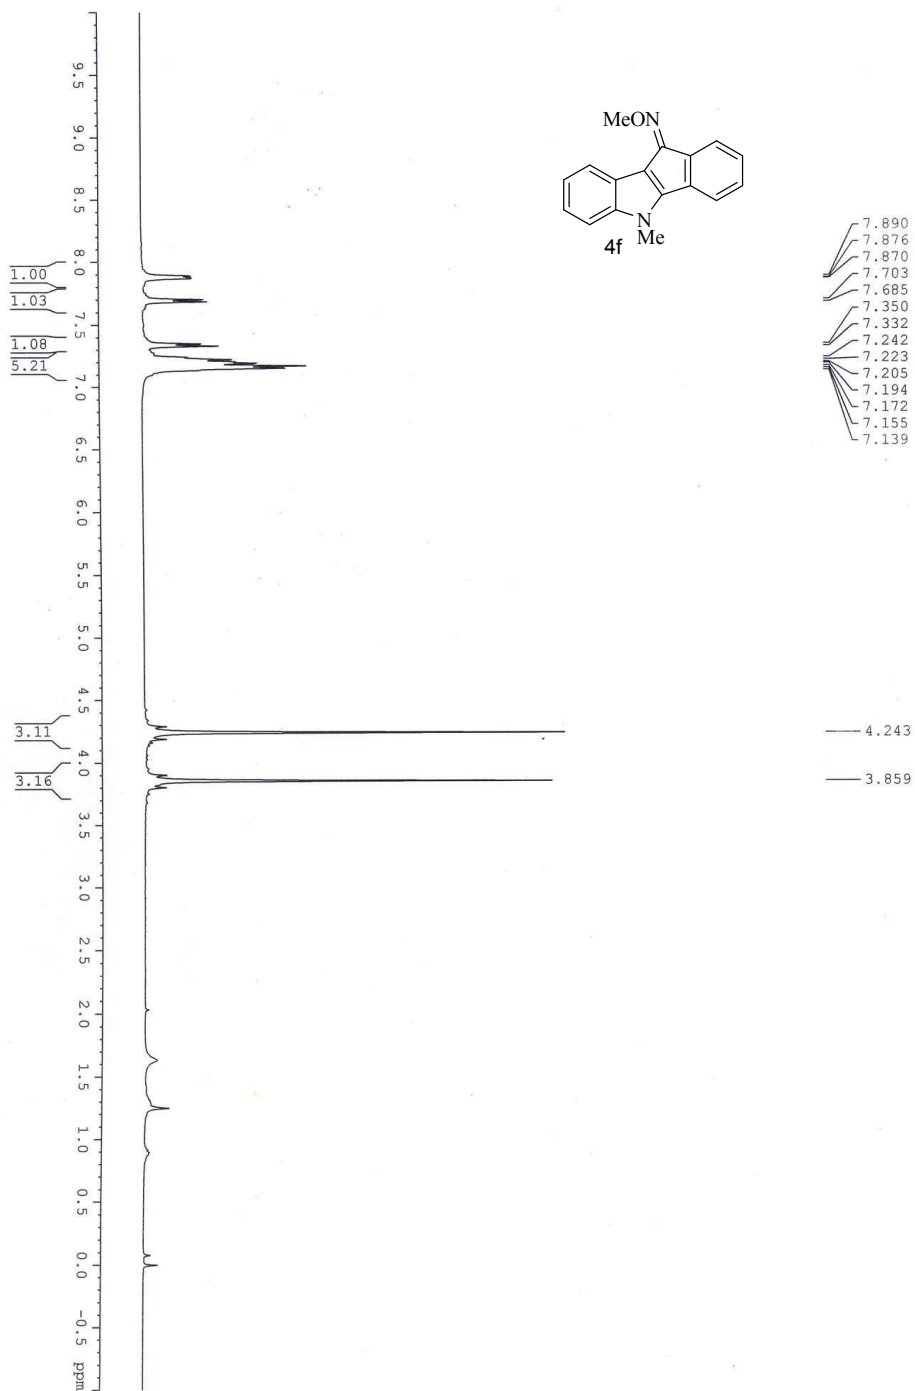

BR--SH--In-Me

5-methylindeno[1,2-b]indol-10(5H)-one O-methyl oxime (4f):

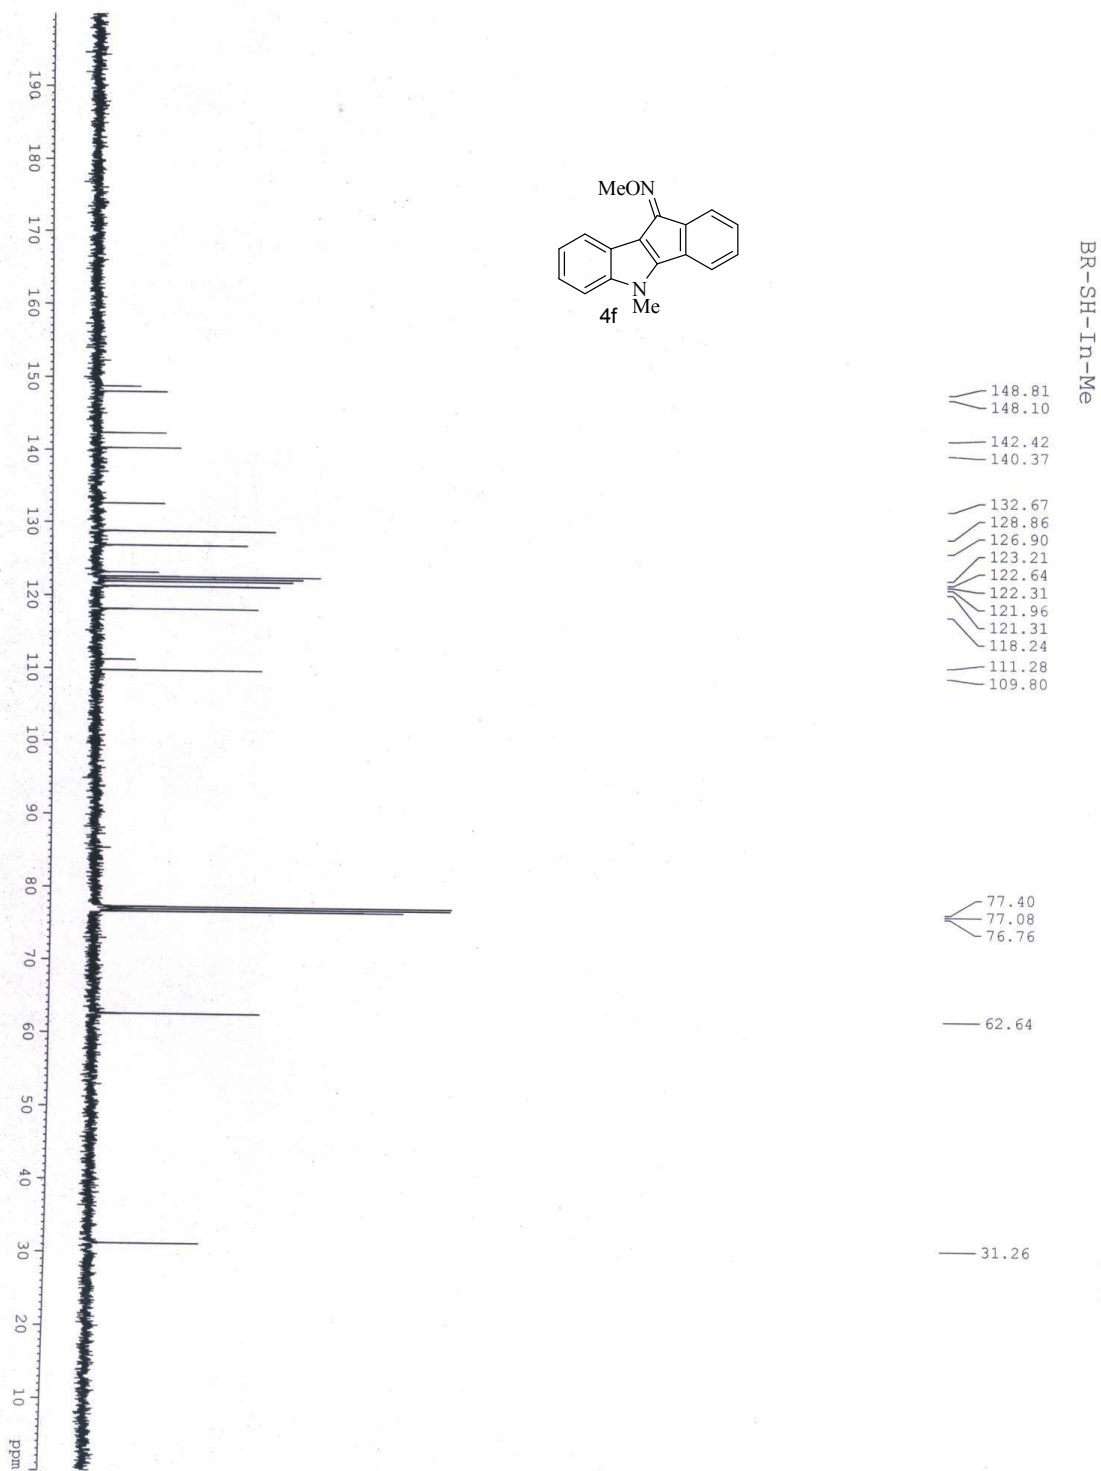

5-methylindeno[1,2-b]indol-10(5H)-one O-methyl oxime (4f):

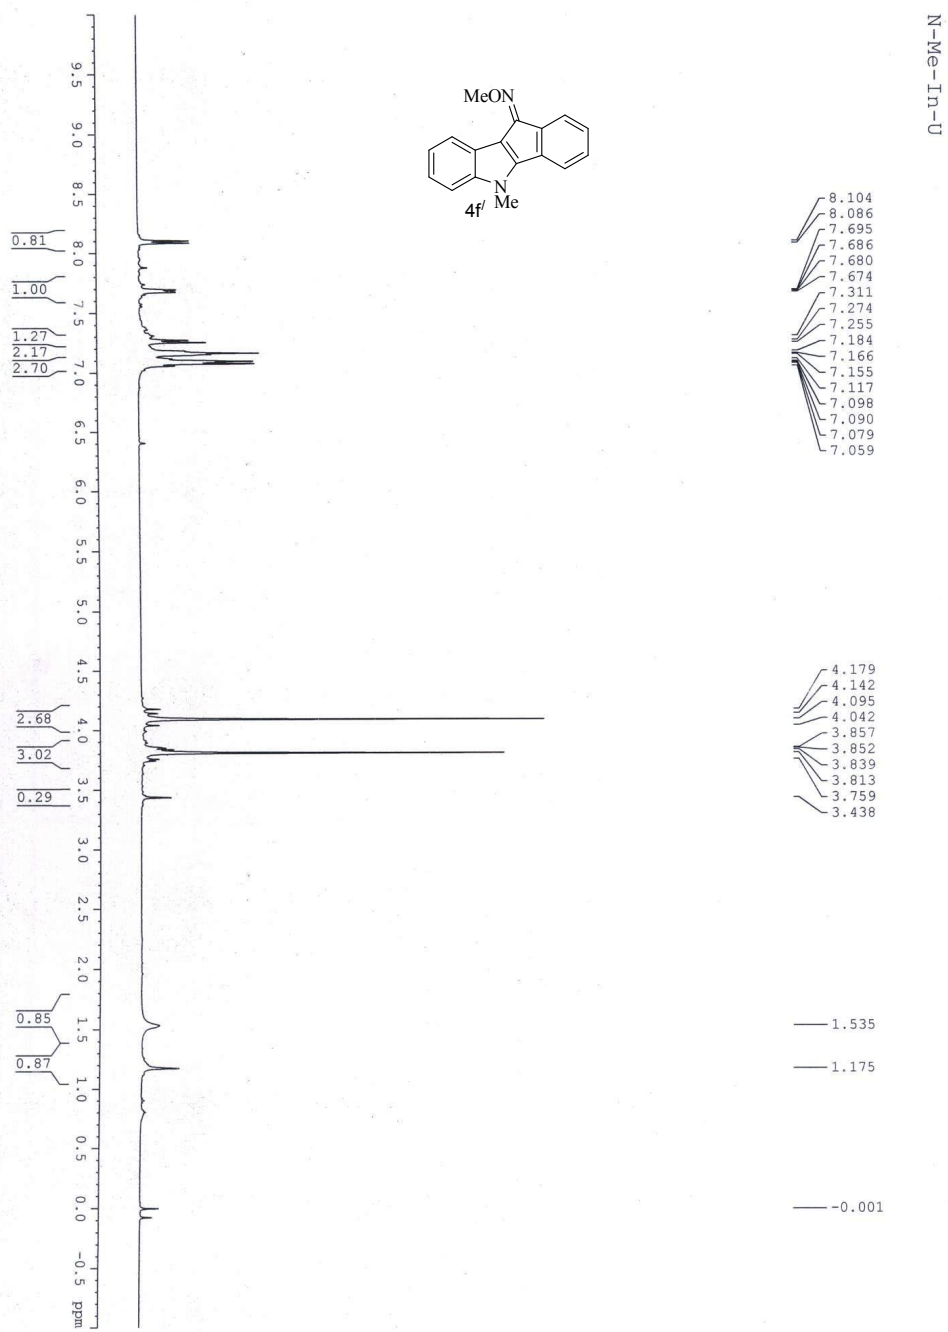

5-methylindeno[1,2-b]indol-10(5H)-one O-methyl oxime (4f/):

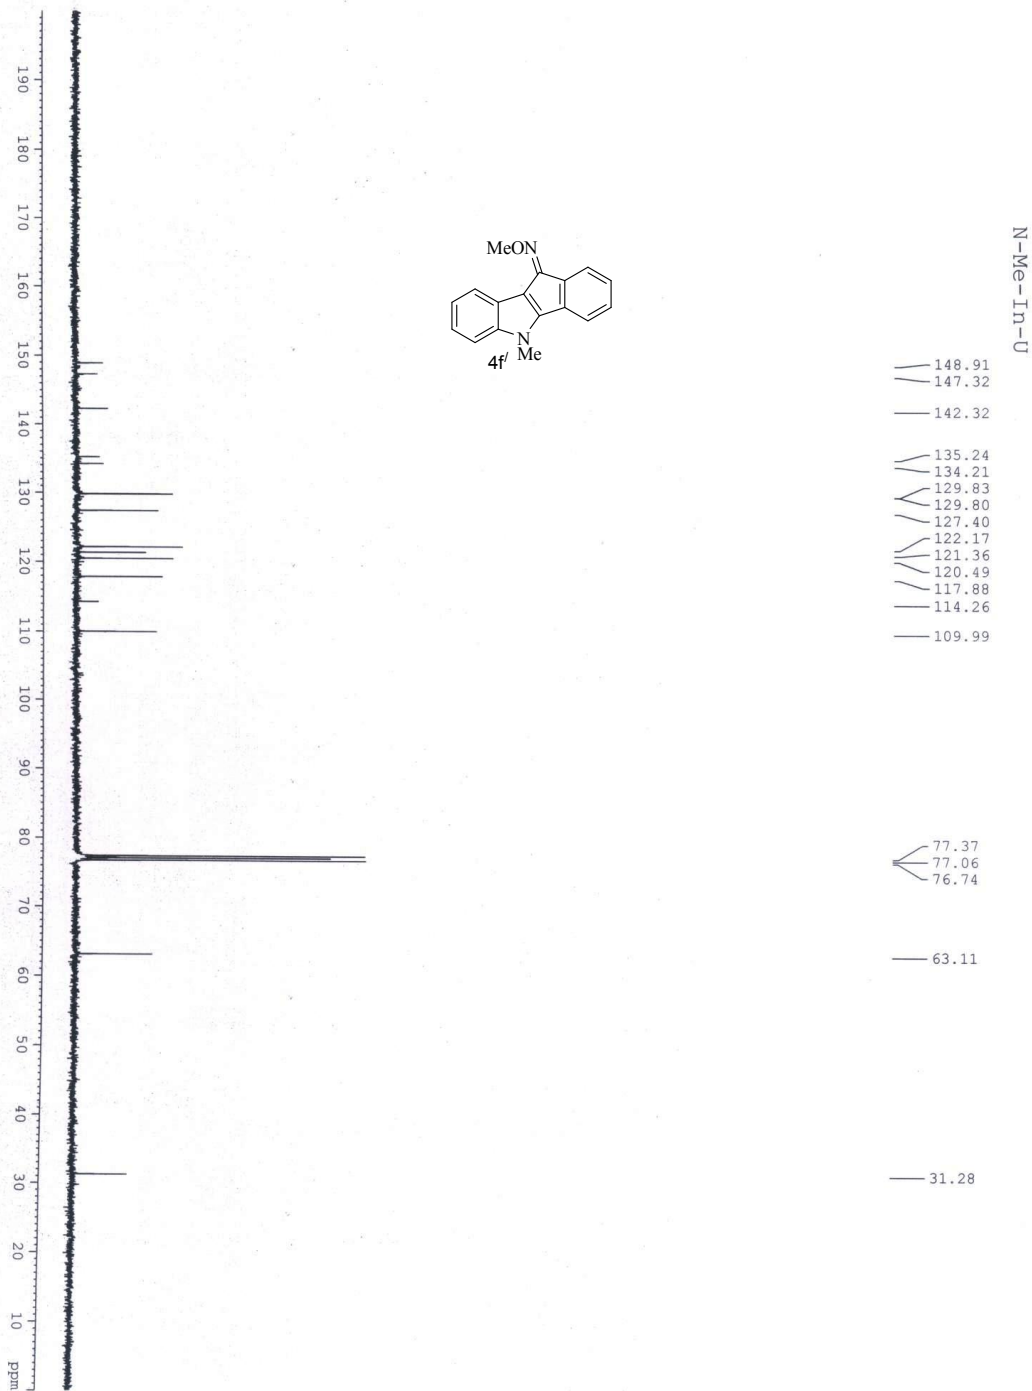

5-propylindeno[1,2-b]indol-10(5H)-one O-methyl oxime (4g):

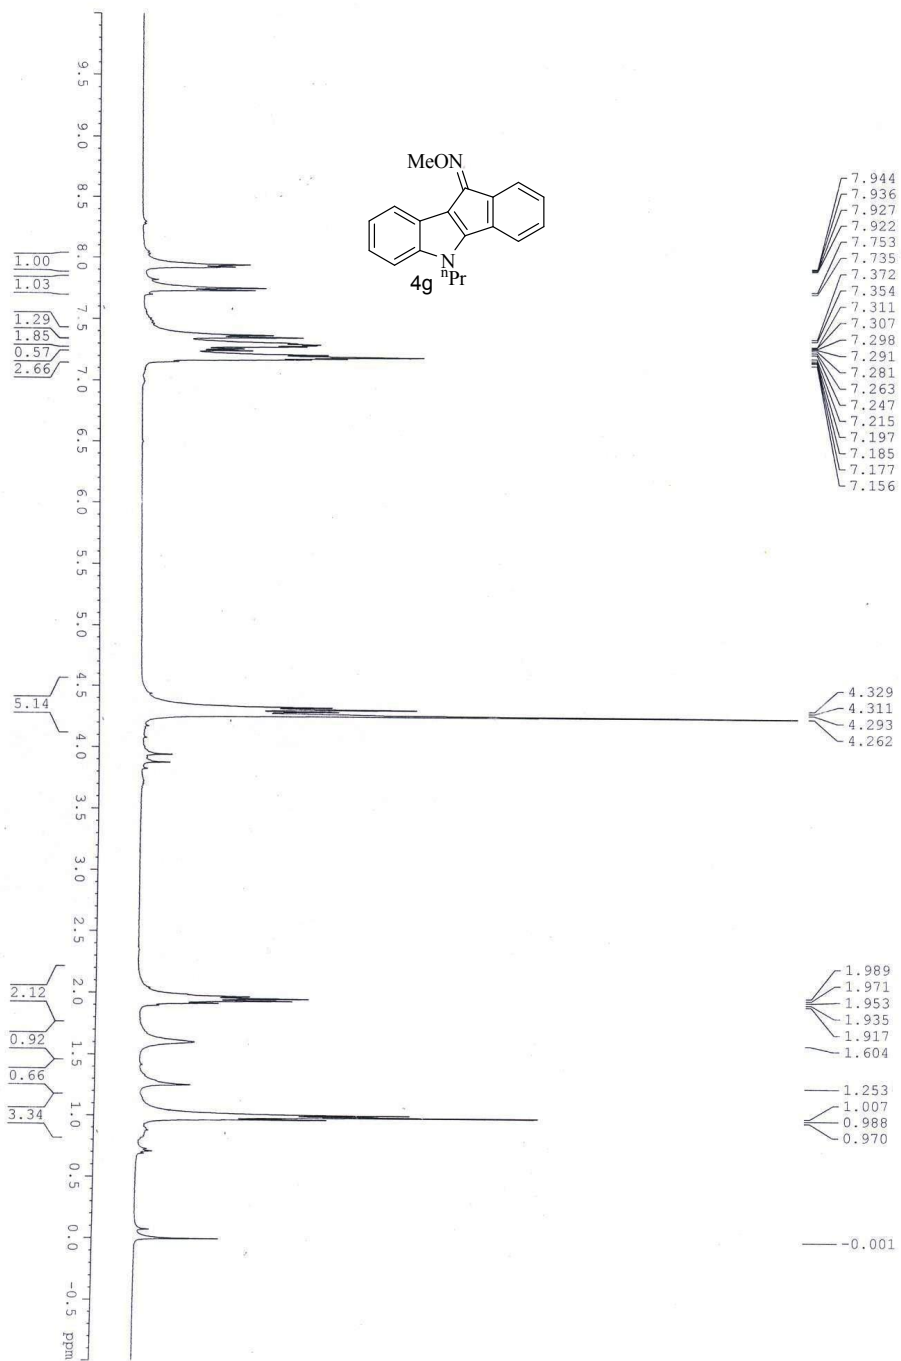

BR-SH-n-Pr

5-propylindeno[1,2-b]indol-10(5H)-one O-methyl oxime (4g):

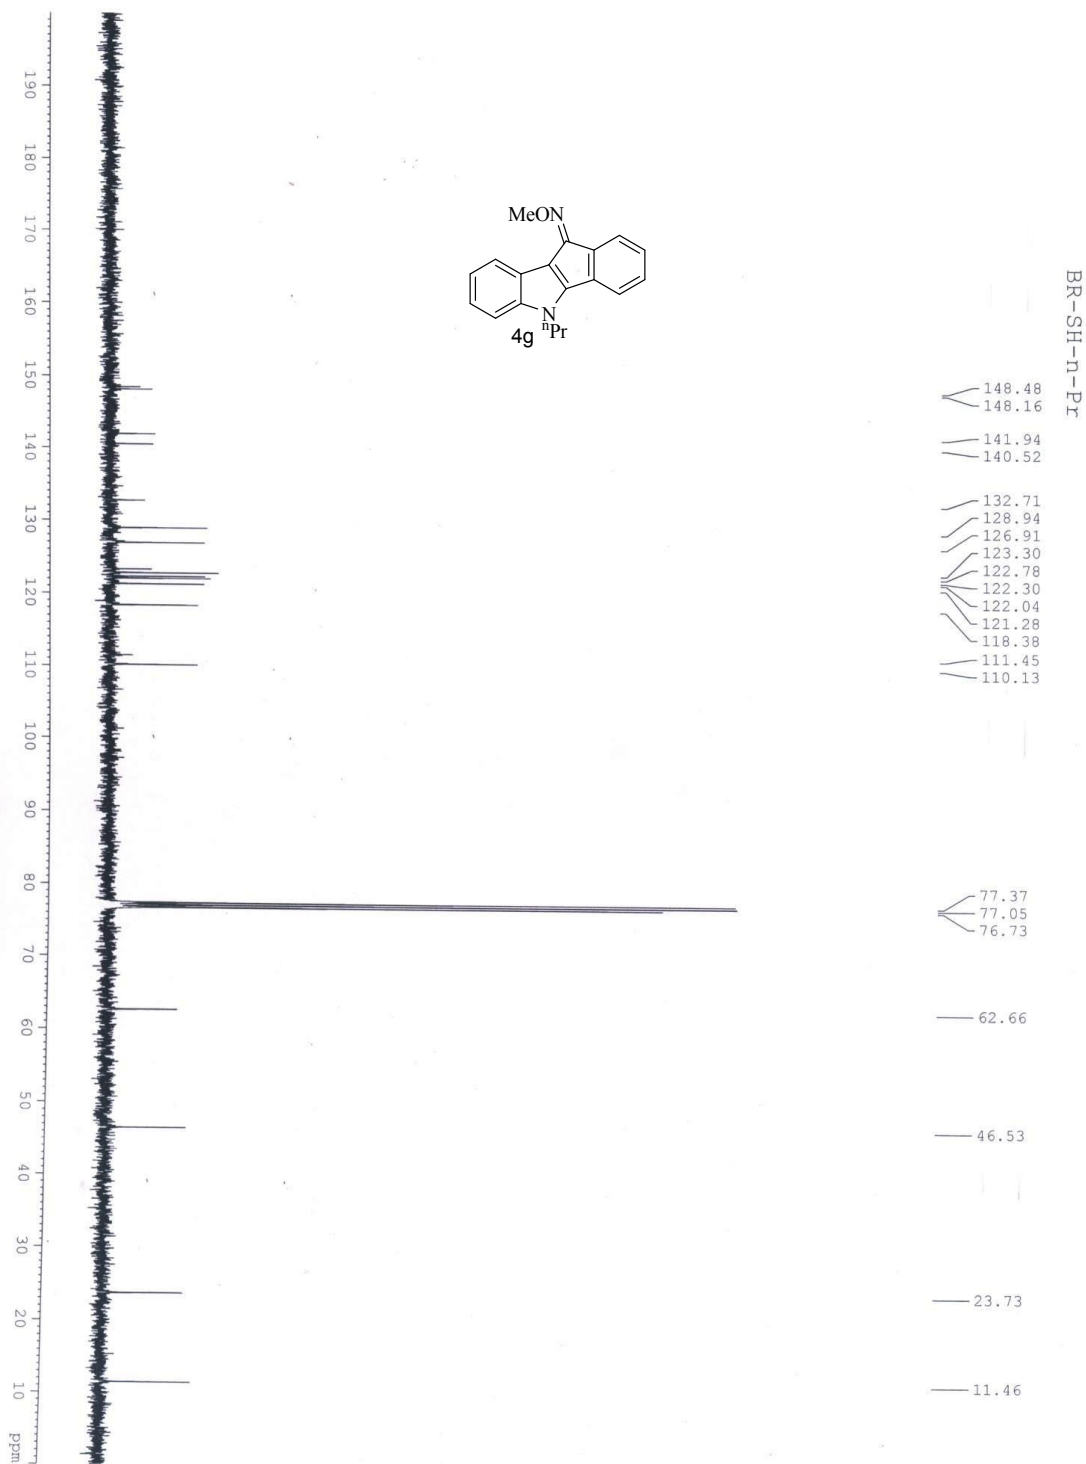

5-butylindeno[1,2-b]indol-10(5H)-one O-methyl oxime (4h):

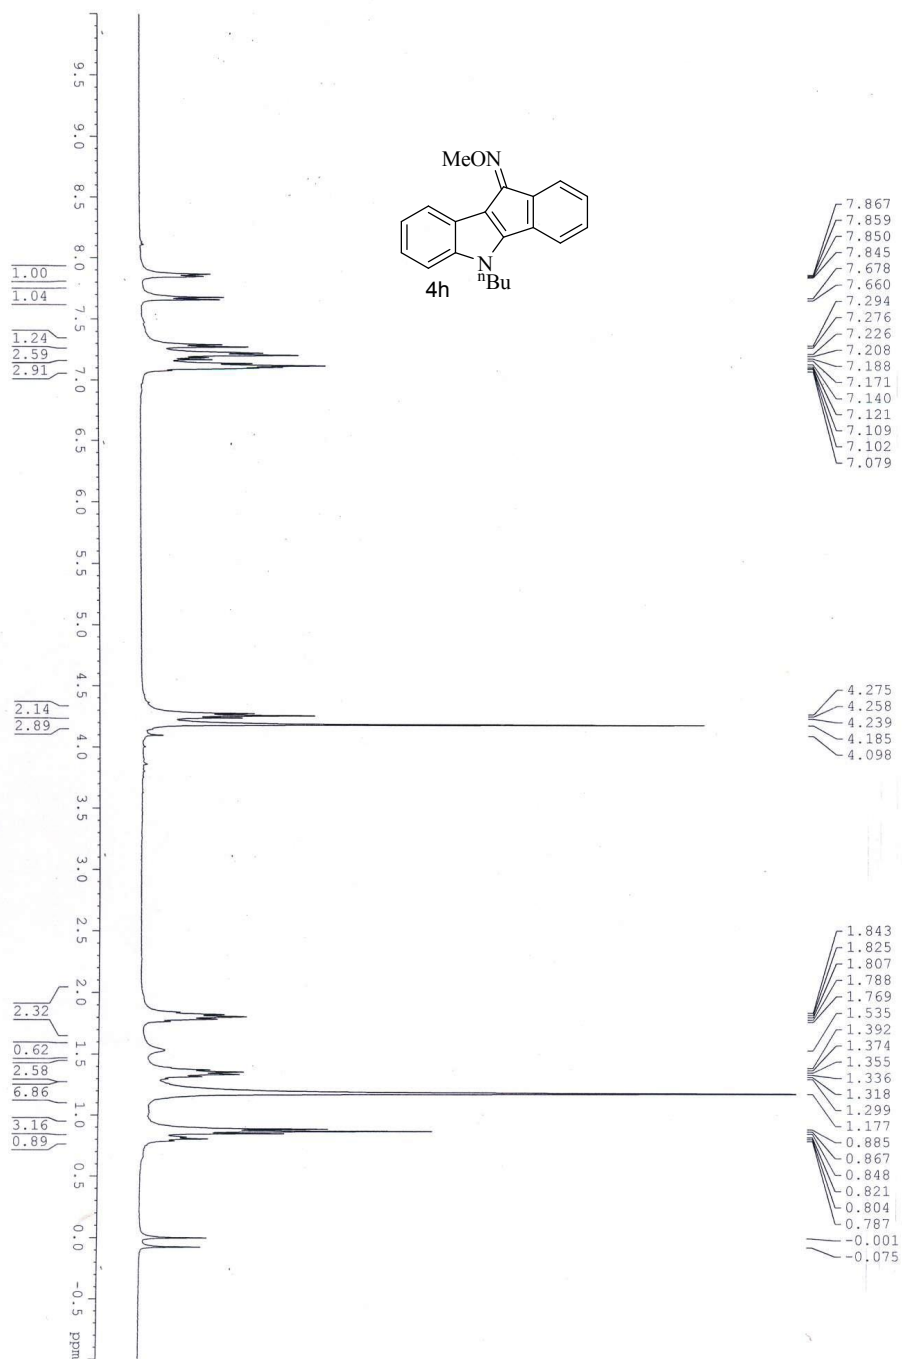



5-butylindeno[1,2-b]indol-10(5H)-one O-methyl oxime (4h):

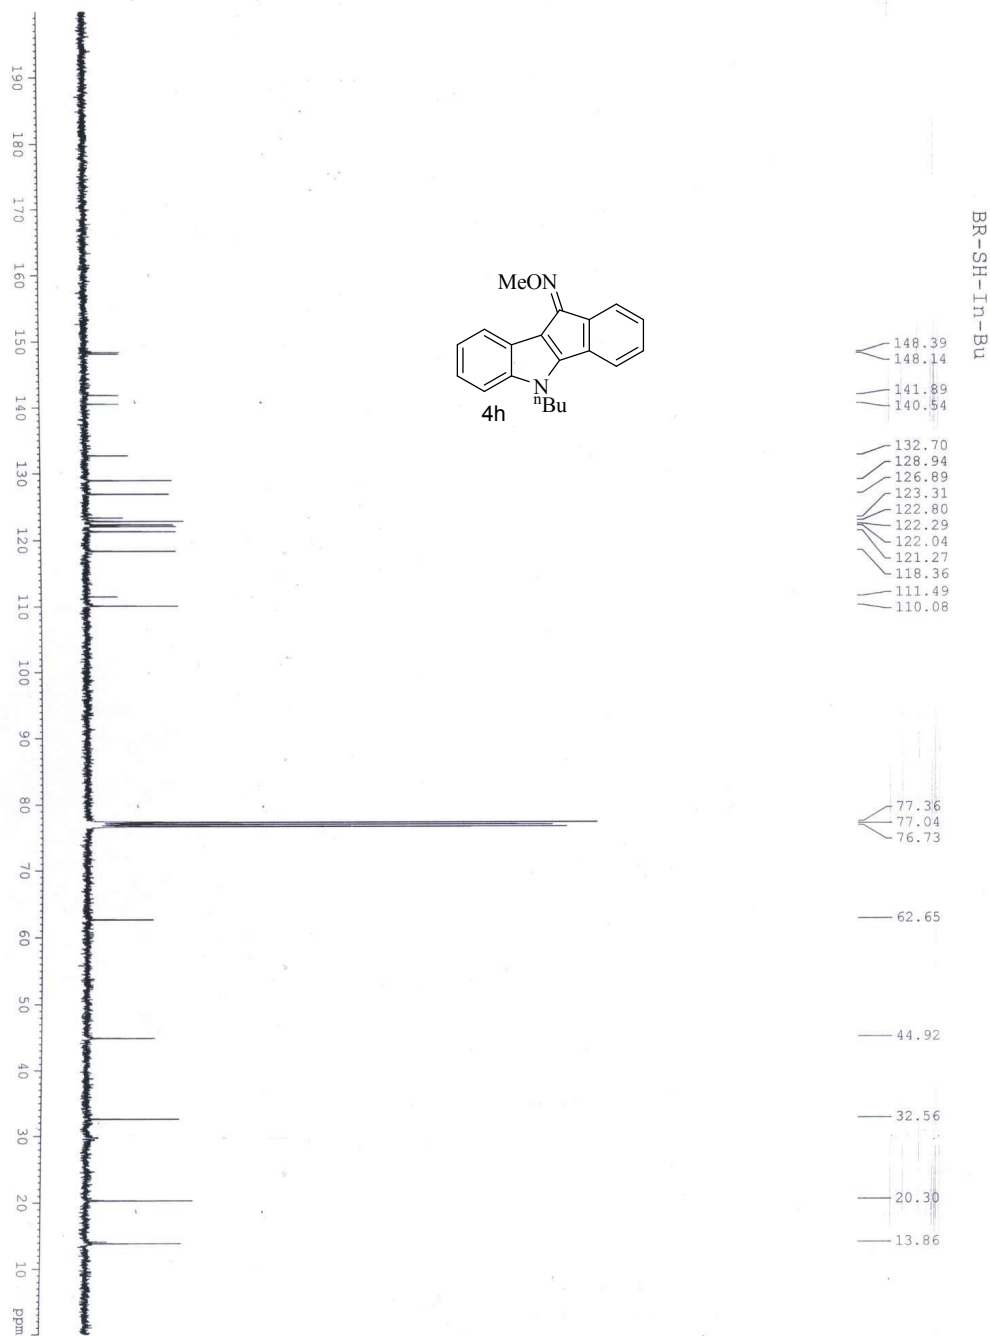

8-methoxy-5-methylindeno[1,2-b]indol-10(5H)-one O-methyl oxime (4i):

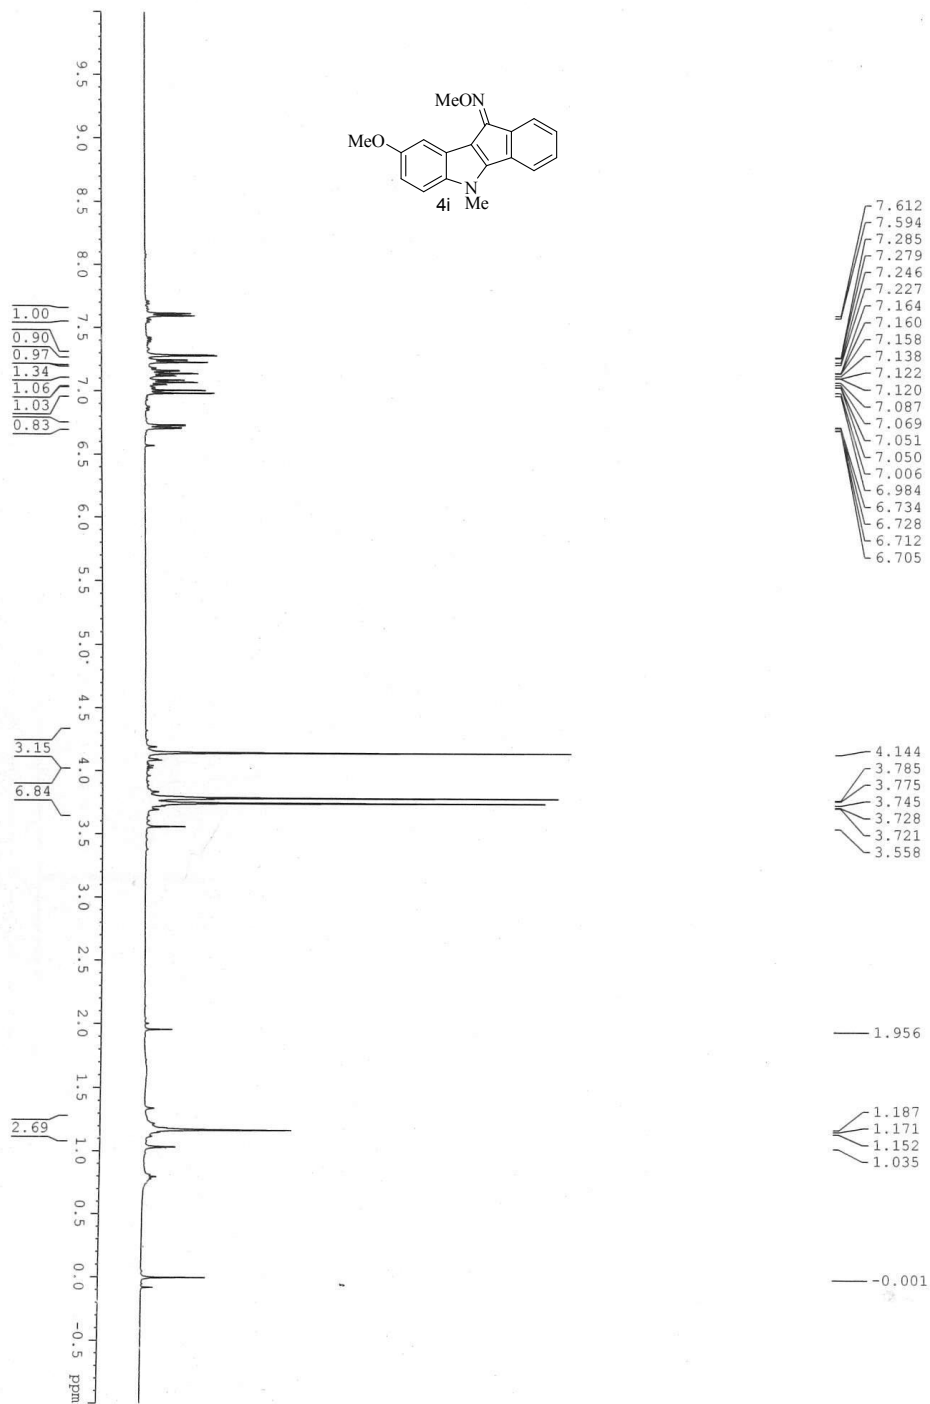

8-methoxy-5-methylindeno[1,2-b]indol-10(5H)-one O-methyl oxime (4i):

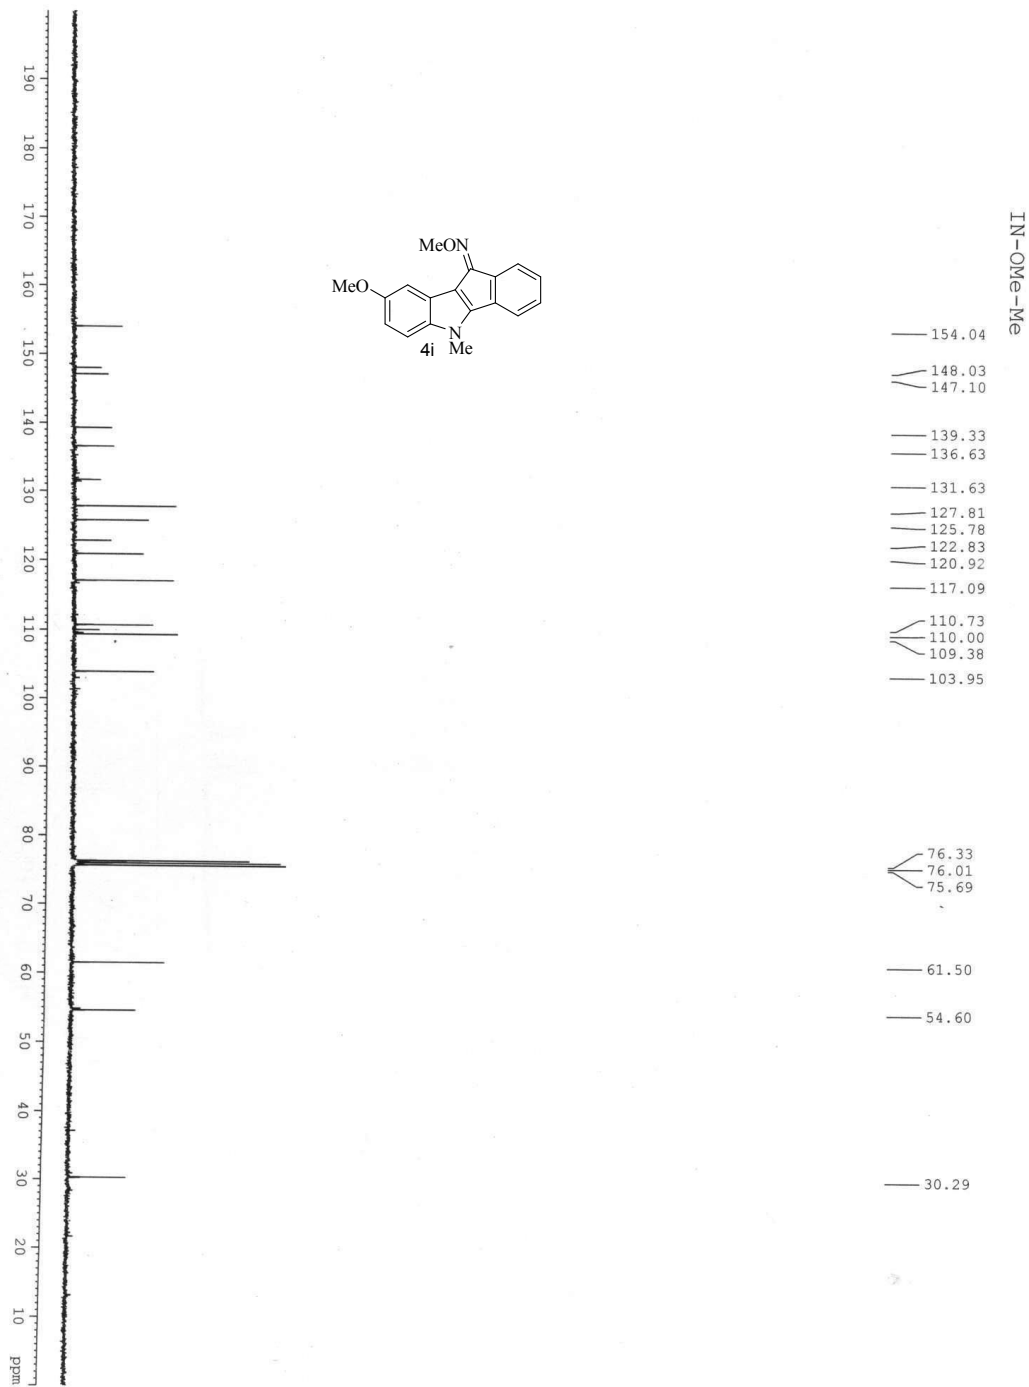

5-isopropyl-8-methoxyindeno[1,2-b]indol-10(5H)-one O-methyl oxime (4j):

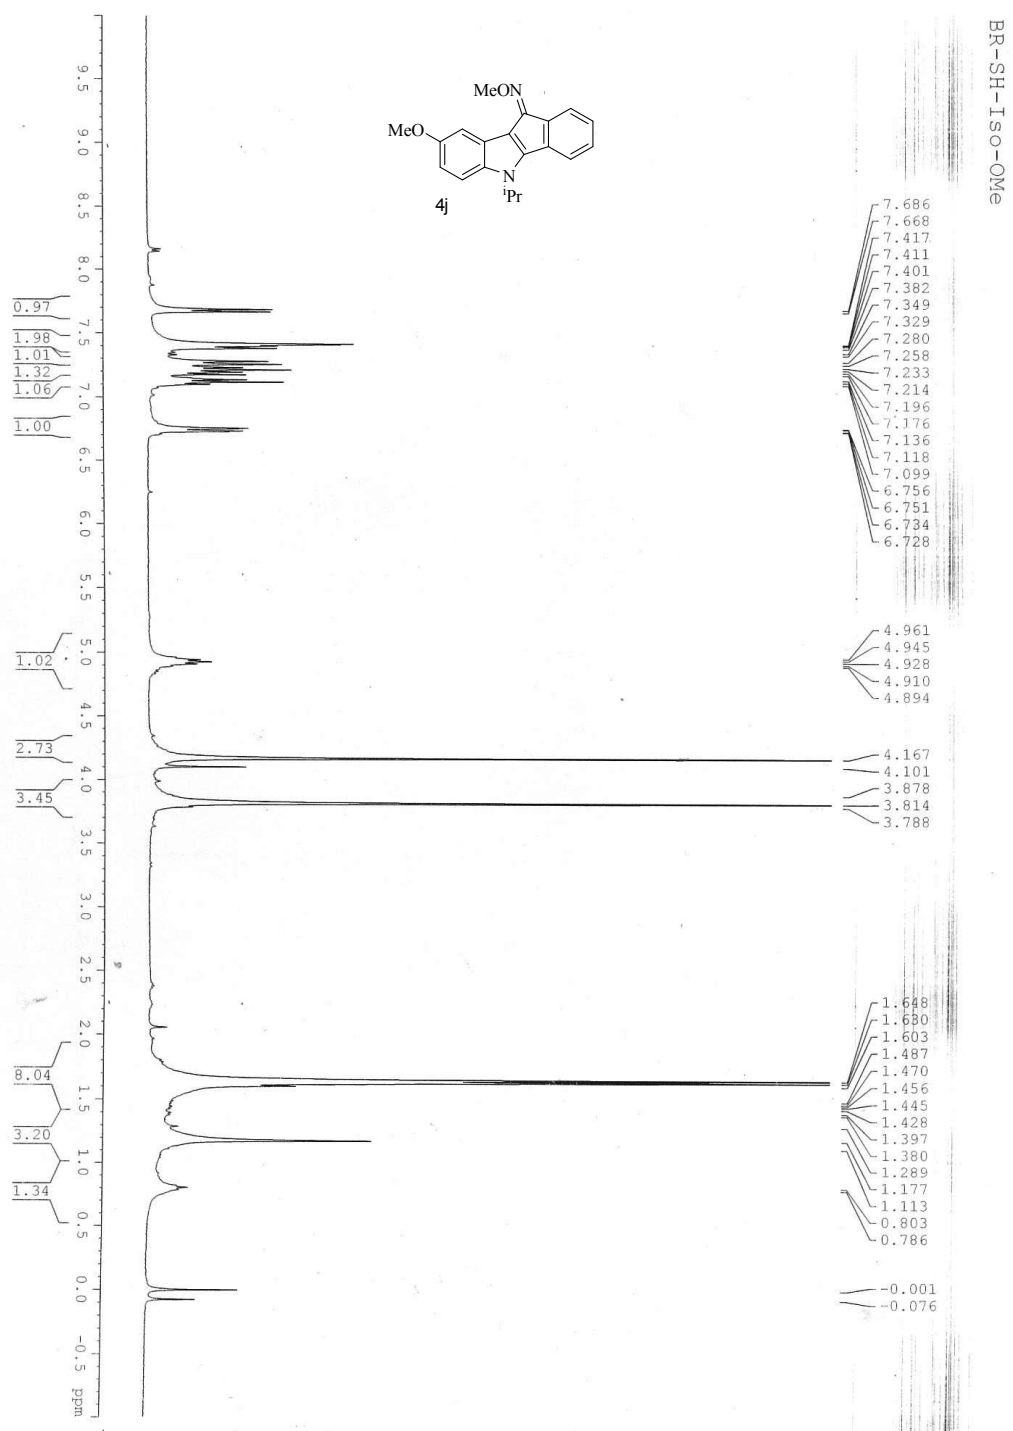

5-isopropyl-8-methoxyindeno[1,2-b]indol-10(5H)-one O-methyl oxime (4j):

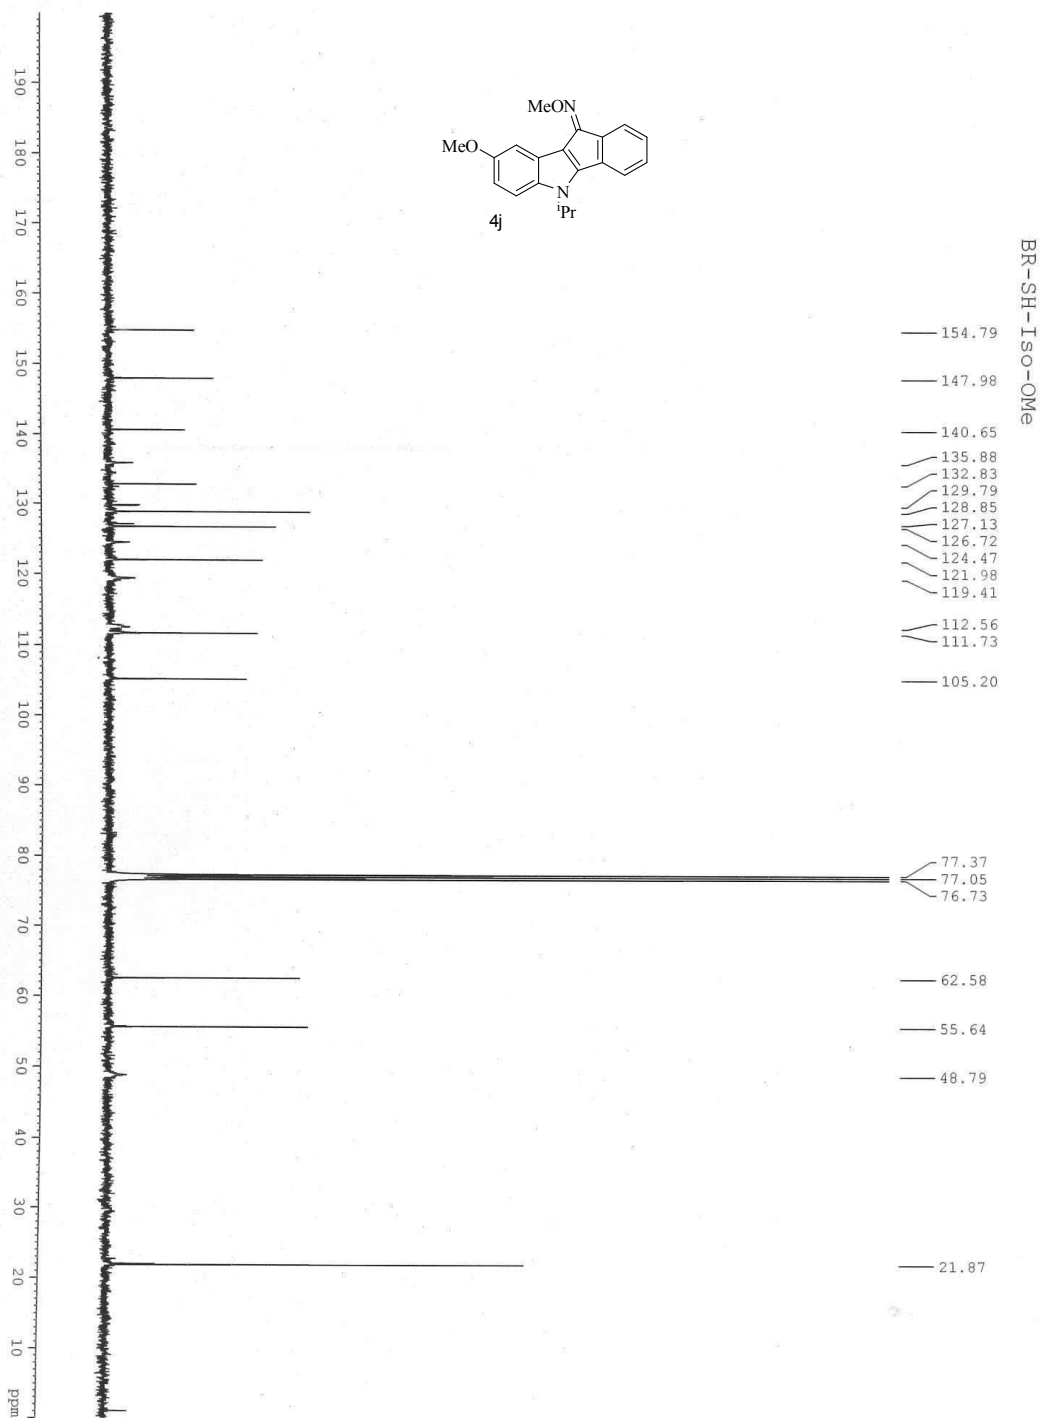

2,3-dimethoxy-5-methylindeno[1,2-b]indol-10(5H)-one O-methyl oxime (4k):

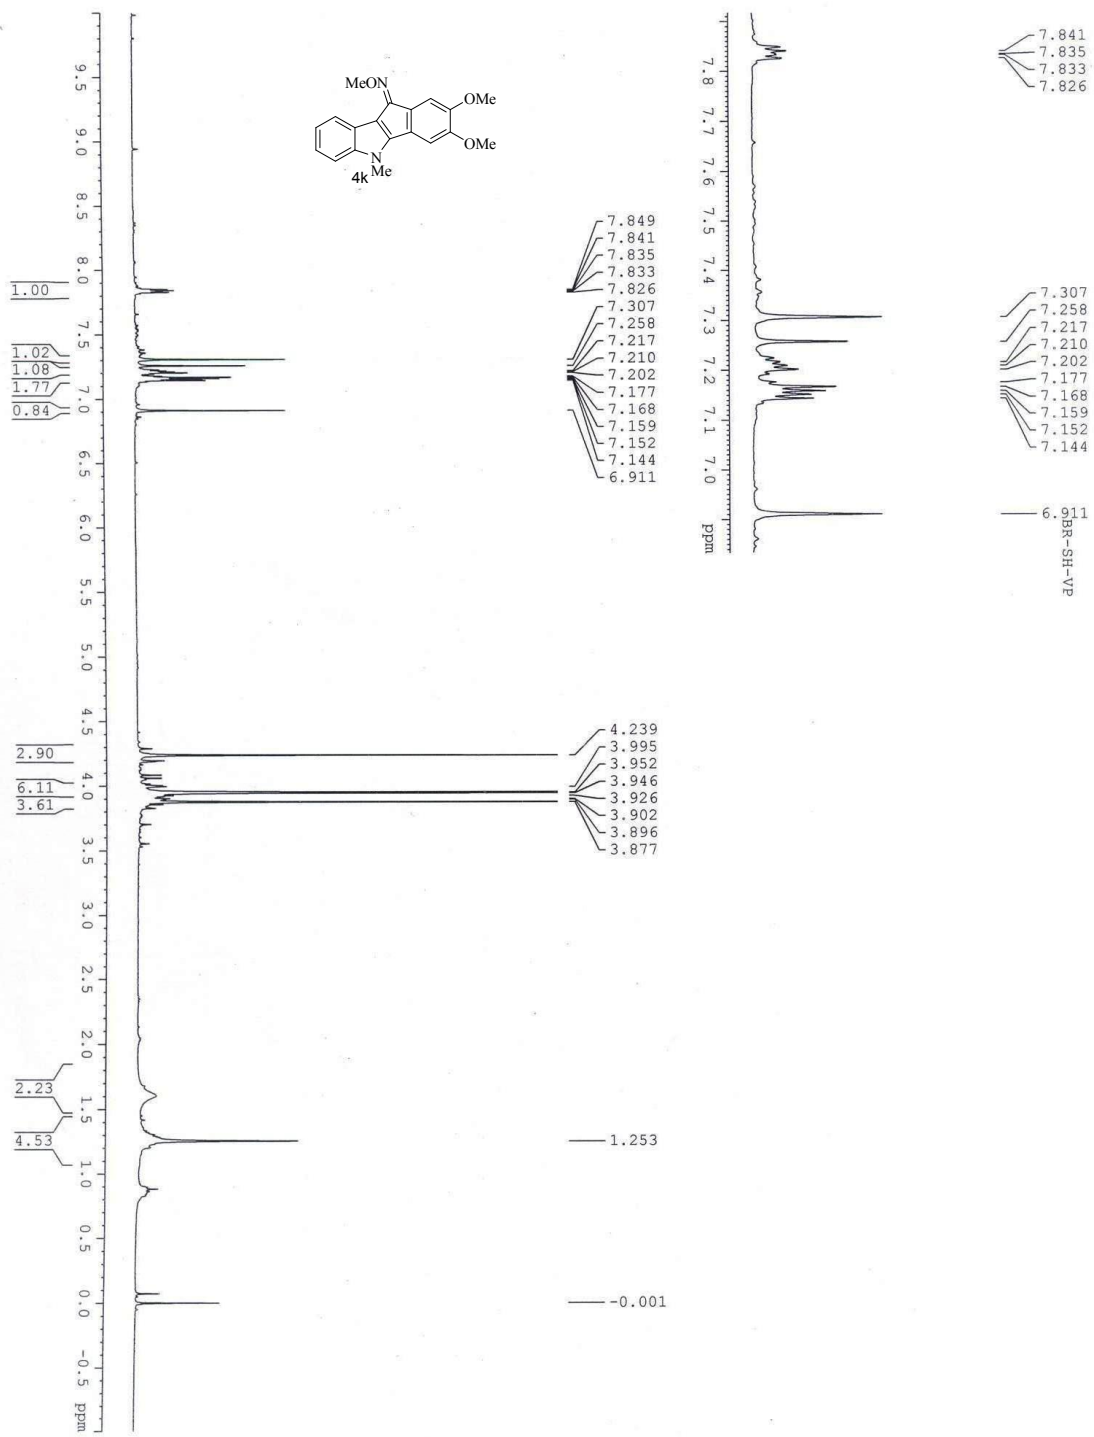

2,3-dimethoxy-5-methylindeno[1,2-b]indol-10(5H)-one O-methyl oxime (4k):

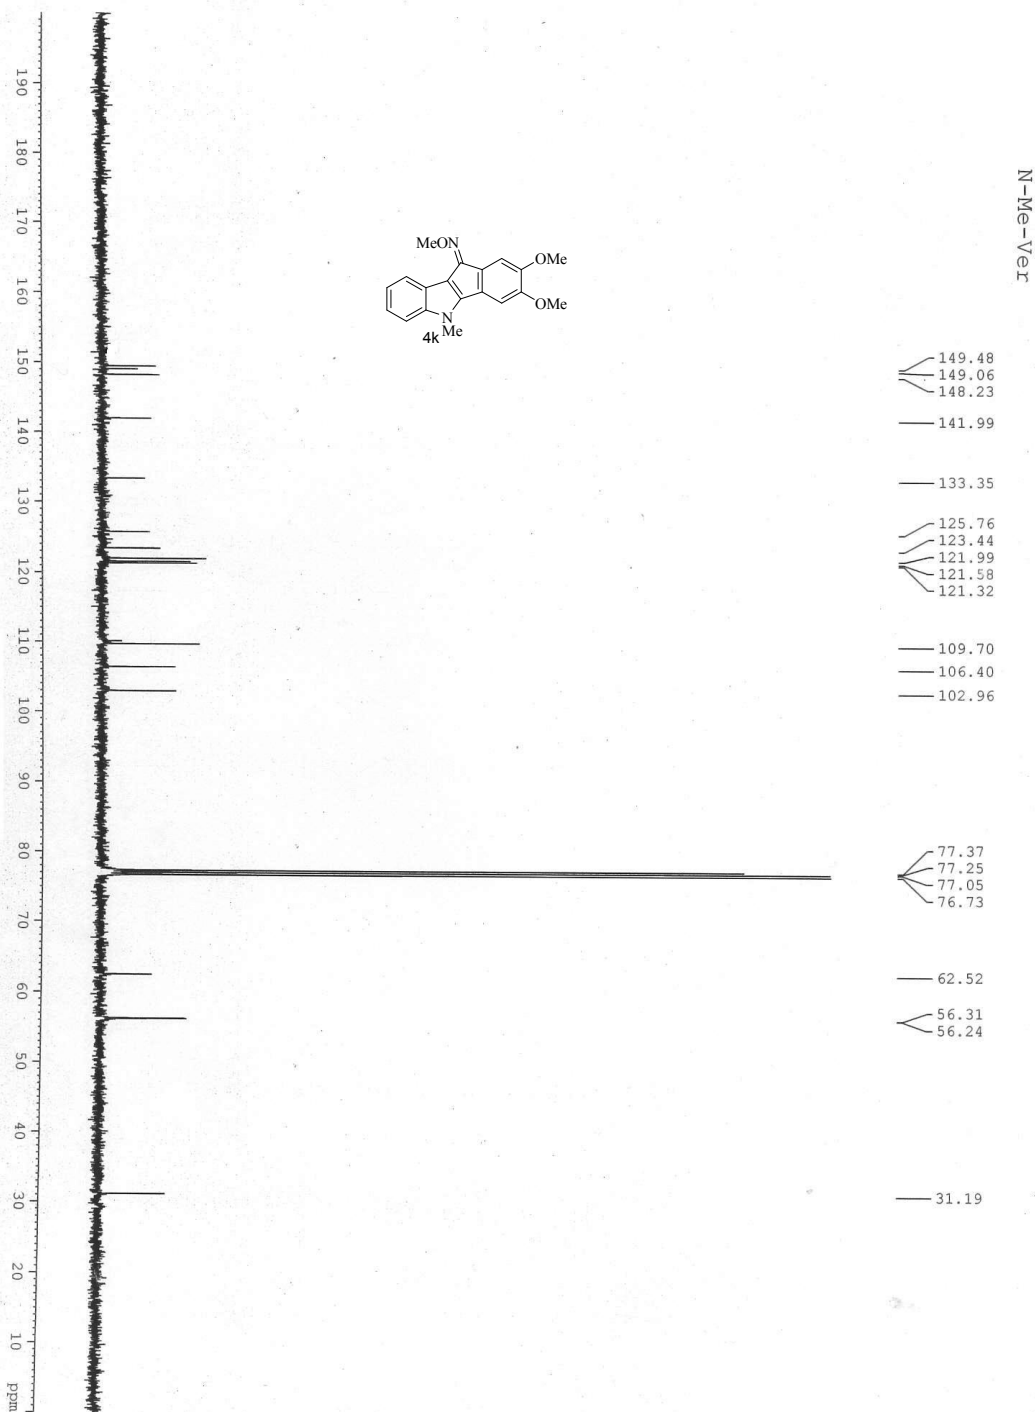

2,3,8-trimethoxy-5-methylindeno[1,2-b]indol-10(5H)-one O-methyl oxime (4l) :

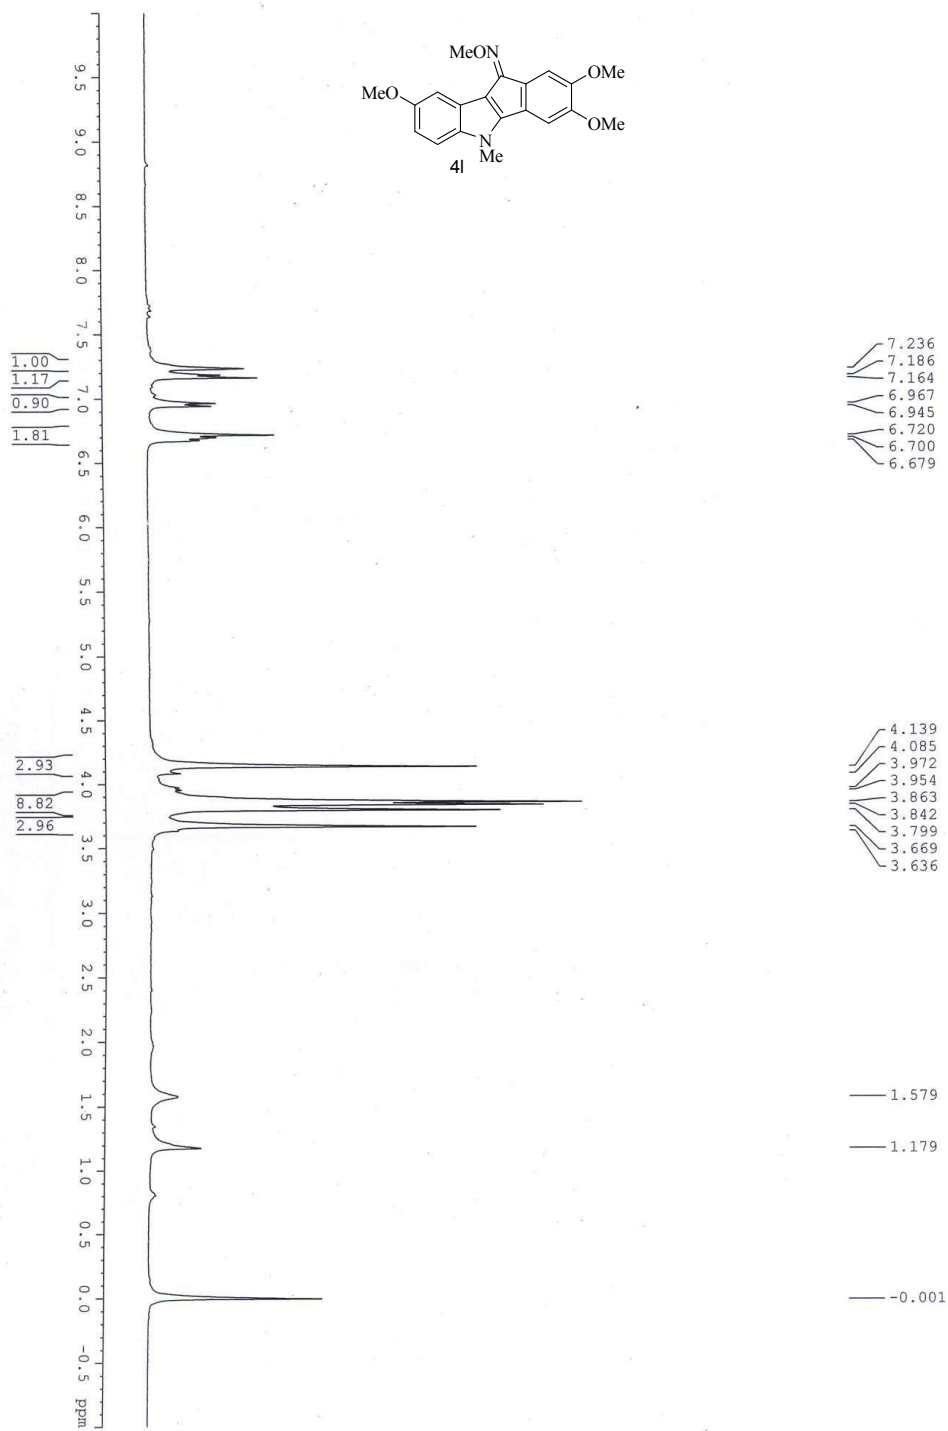

BR-SH-OMe-Ver



2,3,8-trimethoxy-5-methylindeno[1,2-b]indol-10(5H)-one O-methyl oxime (4I) :

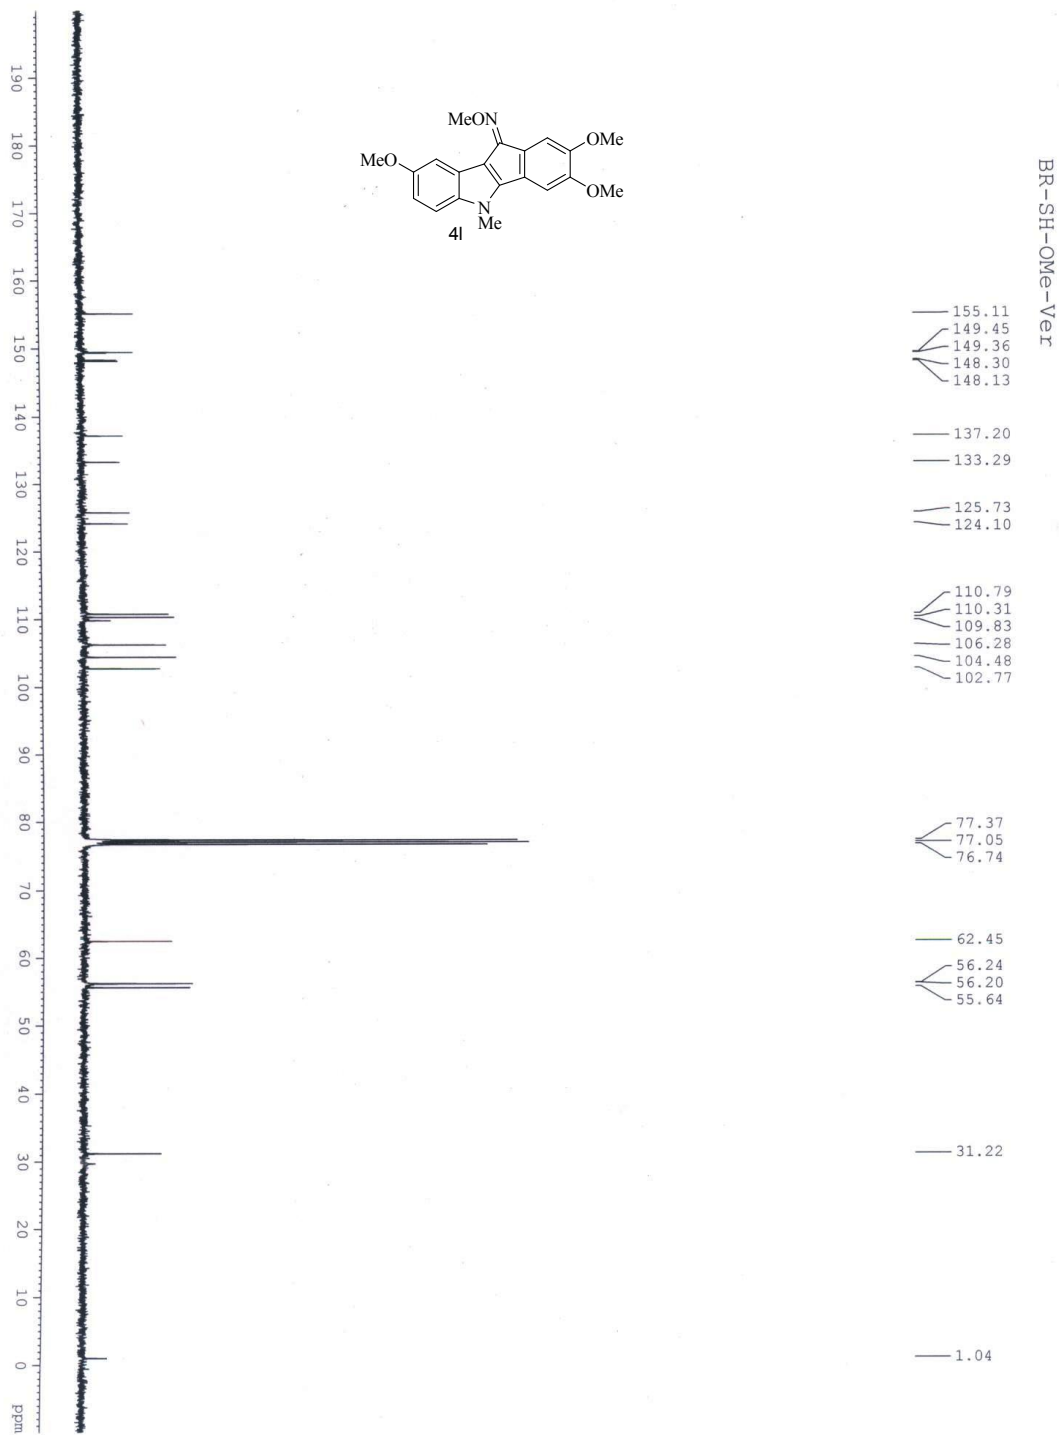

5-ethyl-2,3,8-trimethoxyindeno[1,2-b]indol-10(5H)-one O-methyl oxime (4m):

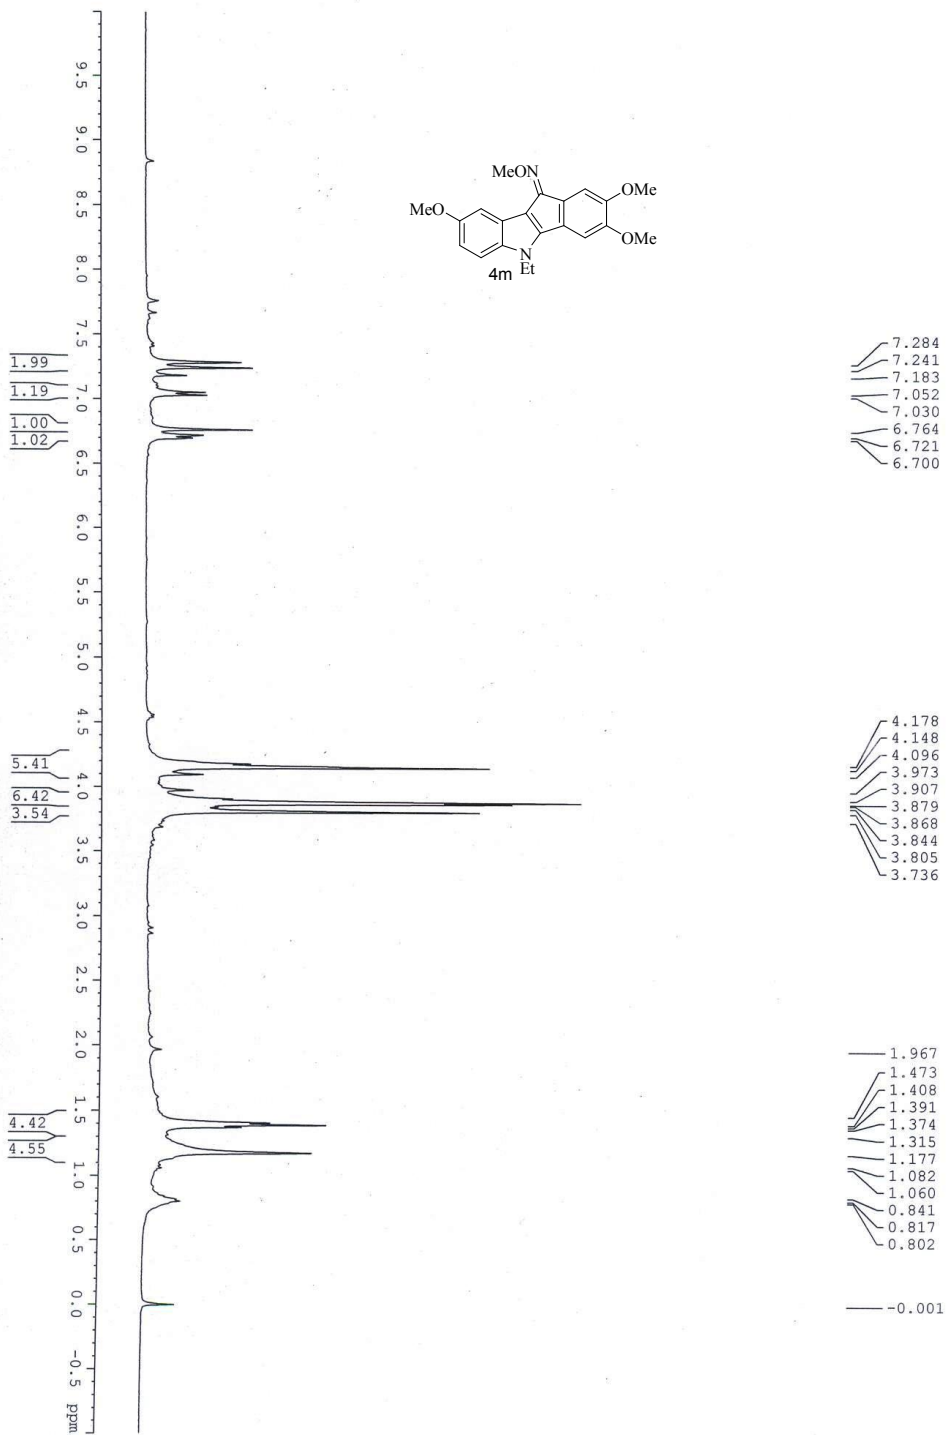

BR-SH-OMe-Et-Ver

5-ethyl-2,3,8-trimethoxyindeno[1,2-b]indol-10(5H)-one O-methyl oxime (4m):

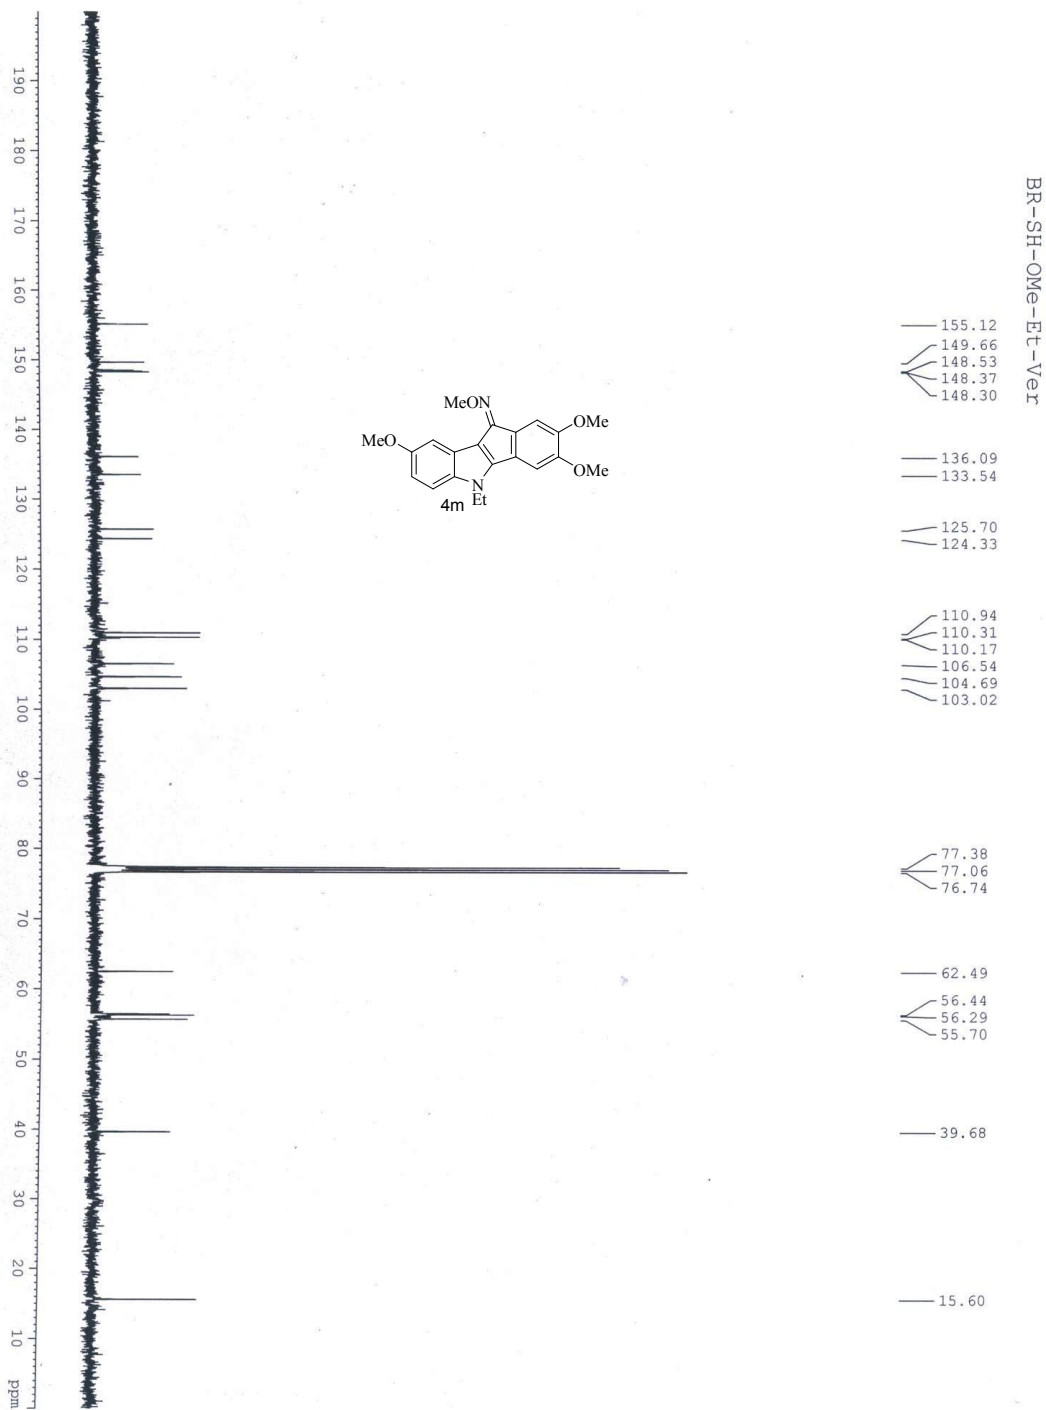

3-fluoro-5-methylindeno[1,2-b]indol-10(5H)-one O-methyl oxime (4n):

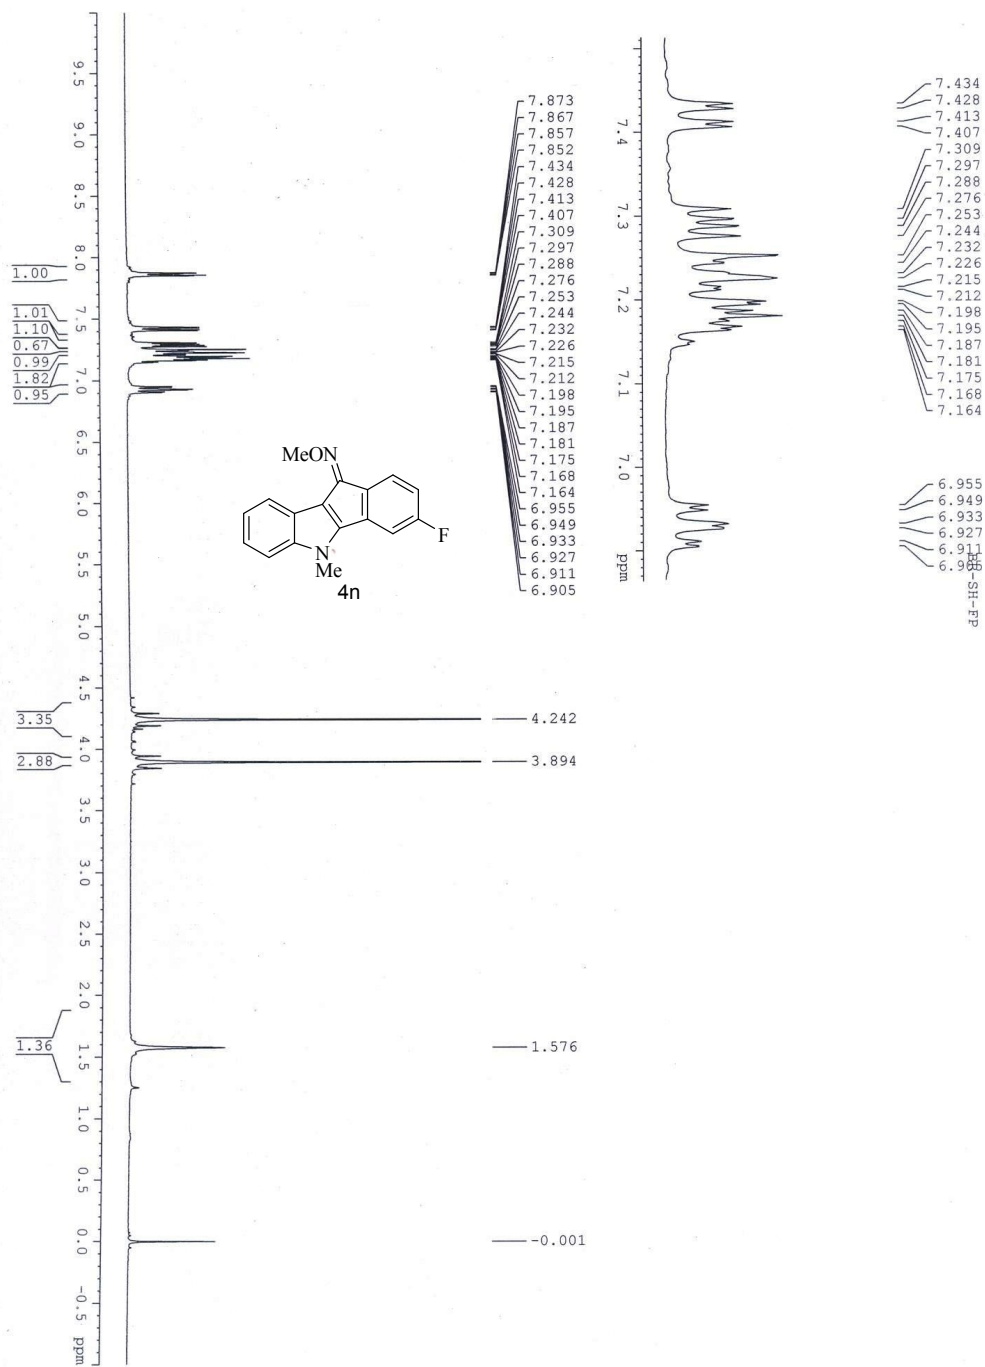

3-fluoro-5-methylindeno[1,2-b]indol-10(5H)-one O-methyl oxime (4n):

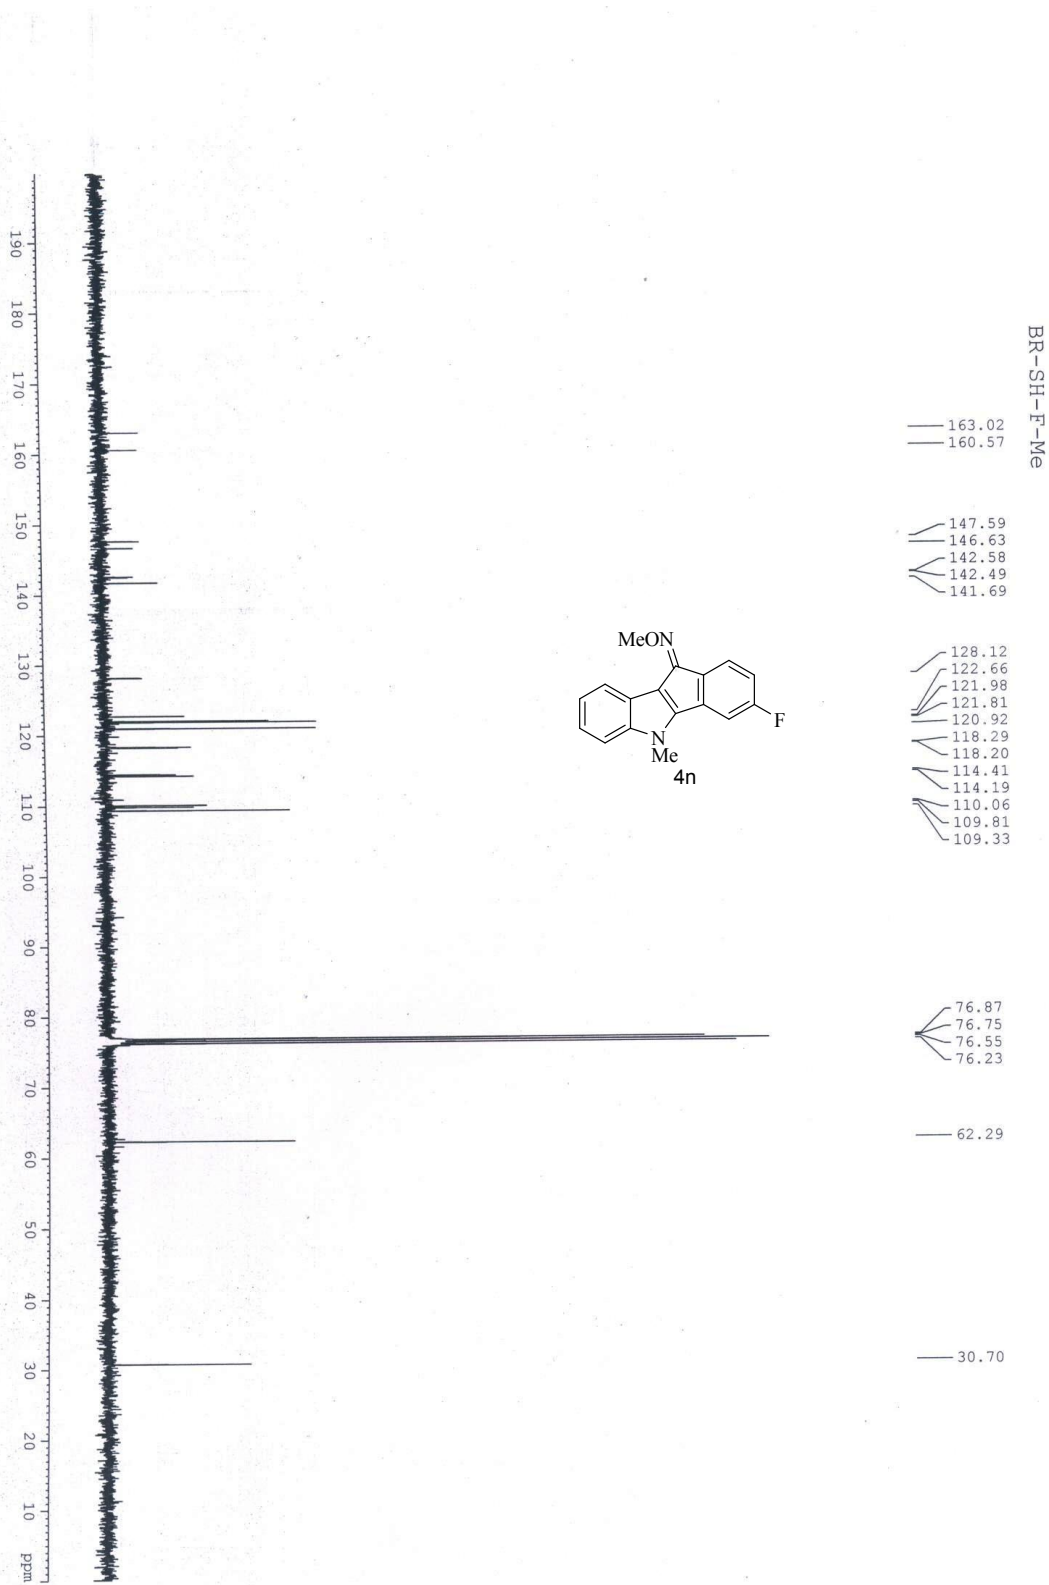

10-(methoxyimino)-5-methyl-5,10-dihydroindeno[1,2-b]indole-8-carbonitrile (4o):

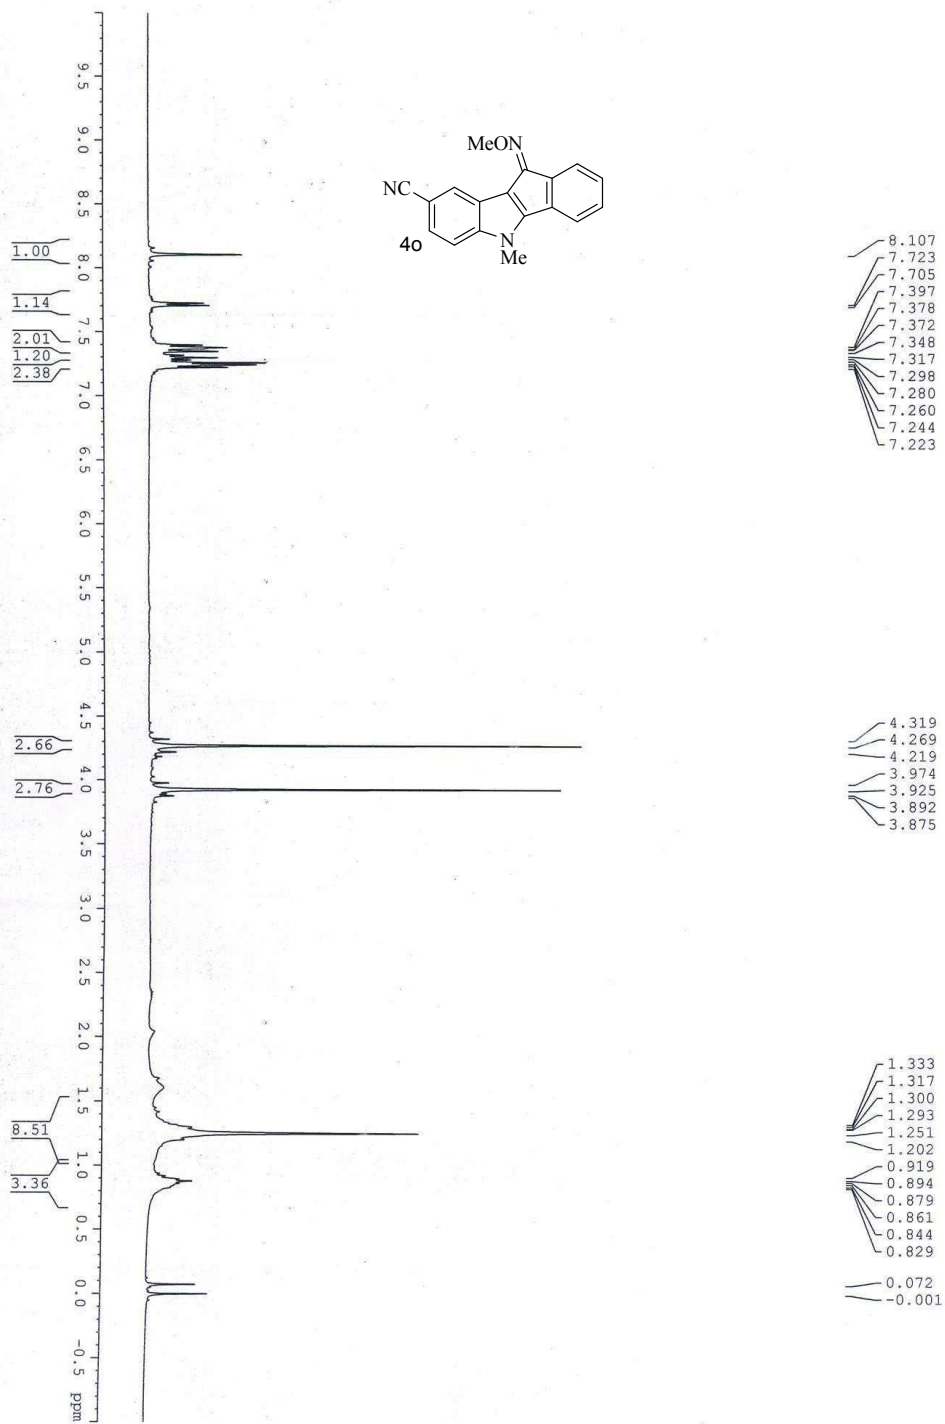

BR-SH-CN-Me

10-(methoxyimino)-5-methyl-5,10-dihydroindeno[1,2-b]indole-8-carbonitrile (4o):

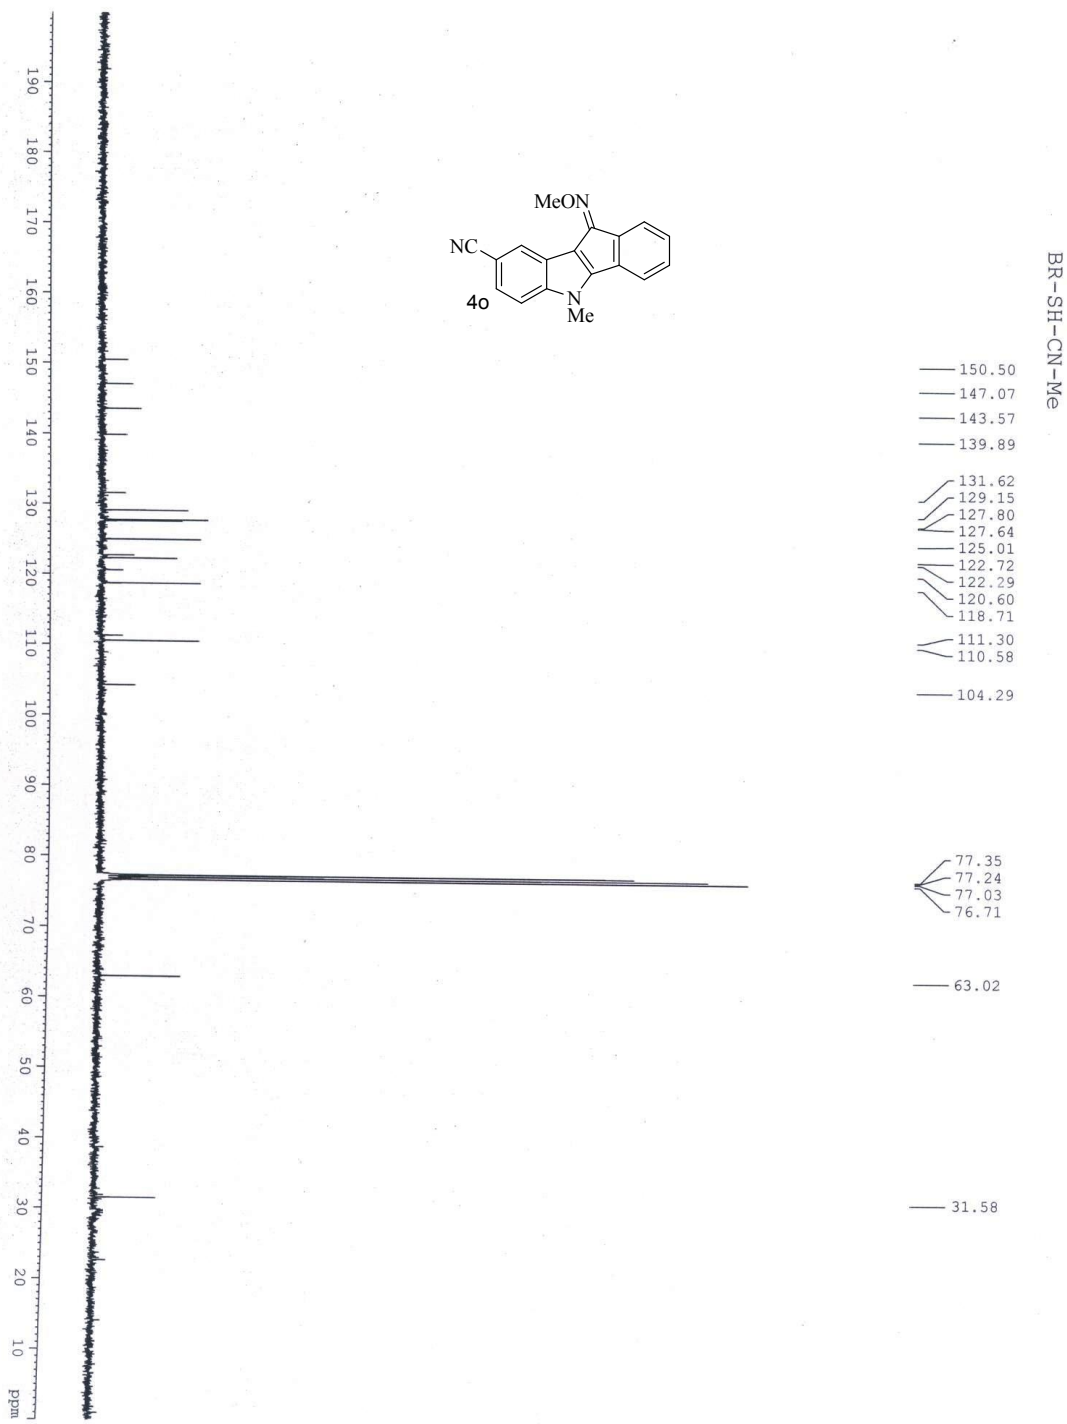

1-methyl-2-phenyl-1H-indole-3-carbaldehyde O-methyl oxime (x):

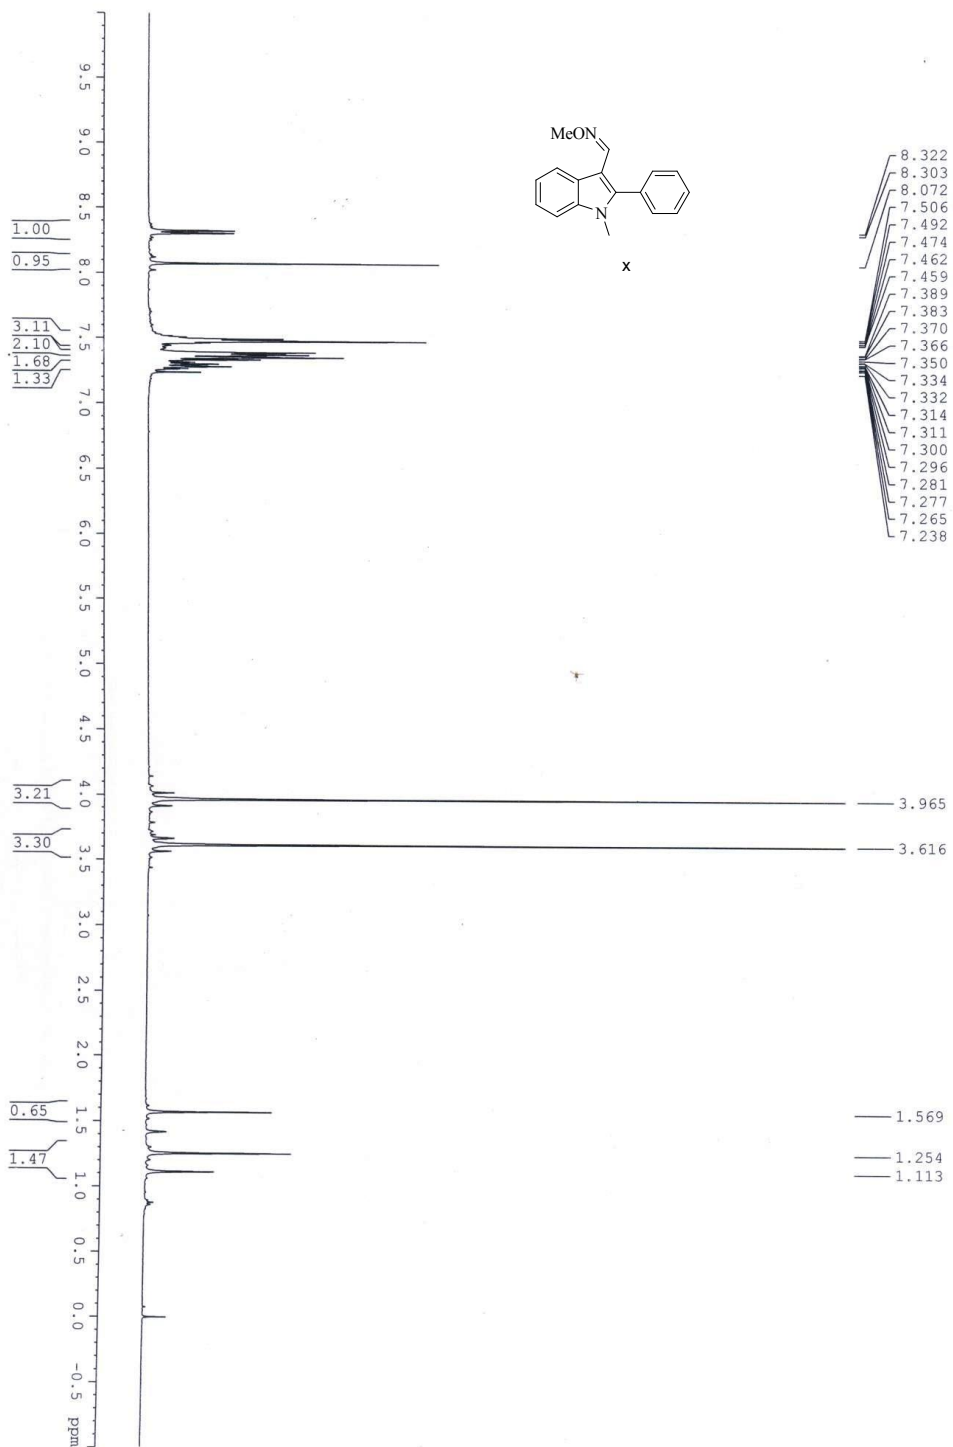



1-methyl-2-phenyl-1H-indole-3-carbaldehyde O-methyl oxime (x):

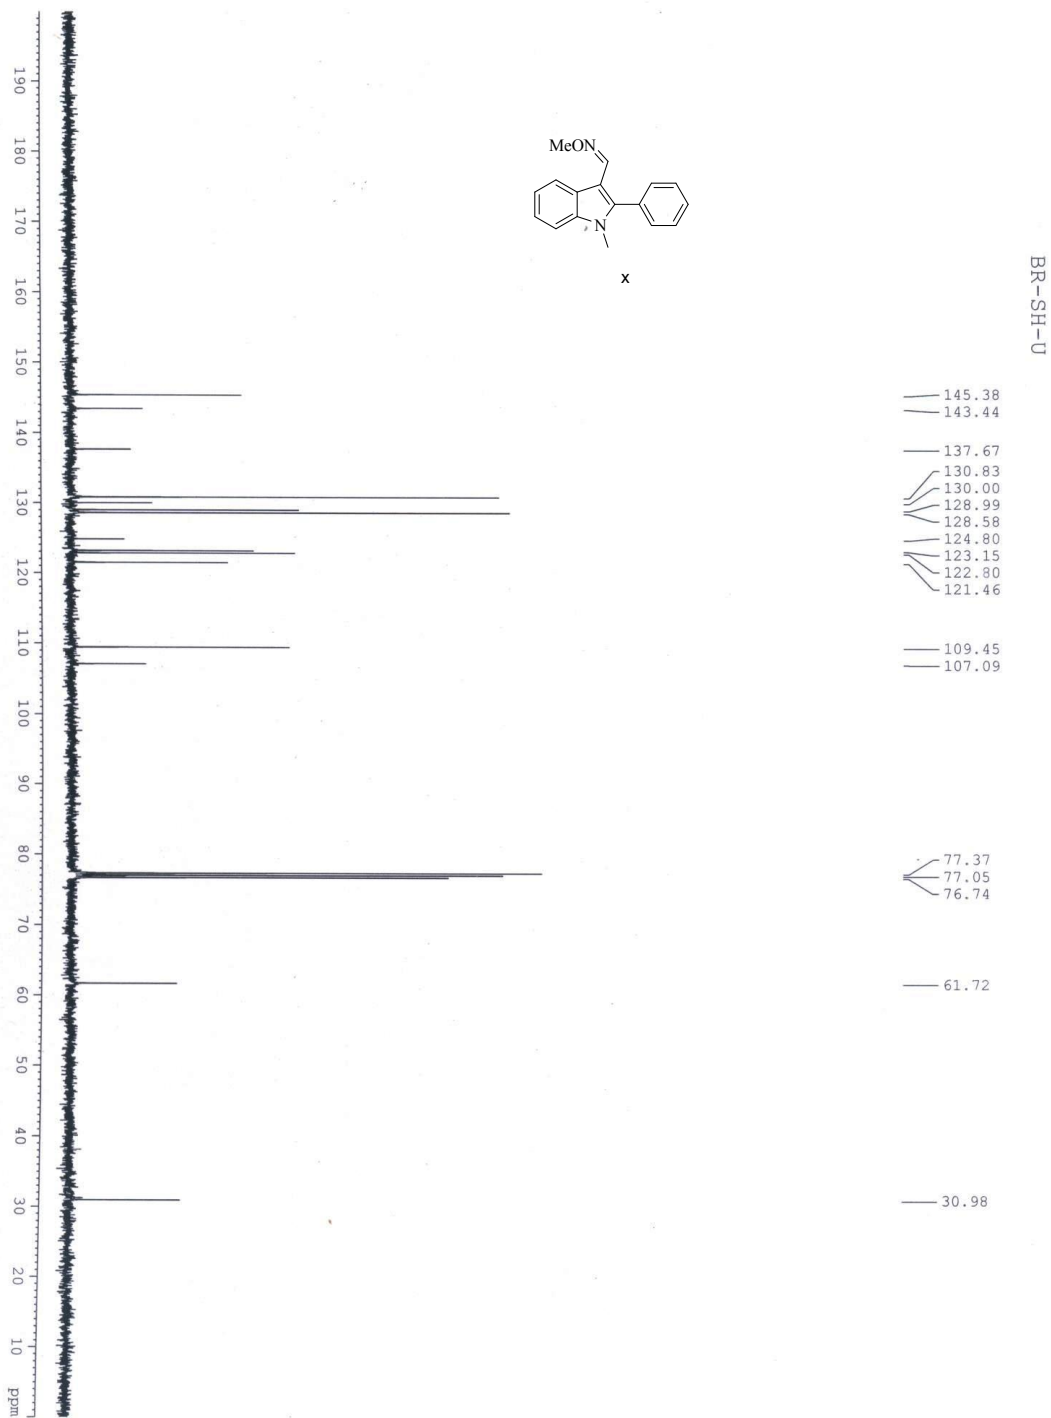

2-(2-(4-ethoxyphenyl)-1-isopropyl-1H-indol-3-yl)benzaldehyde O-methyl oxime (6):

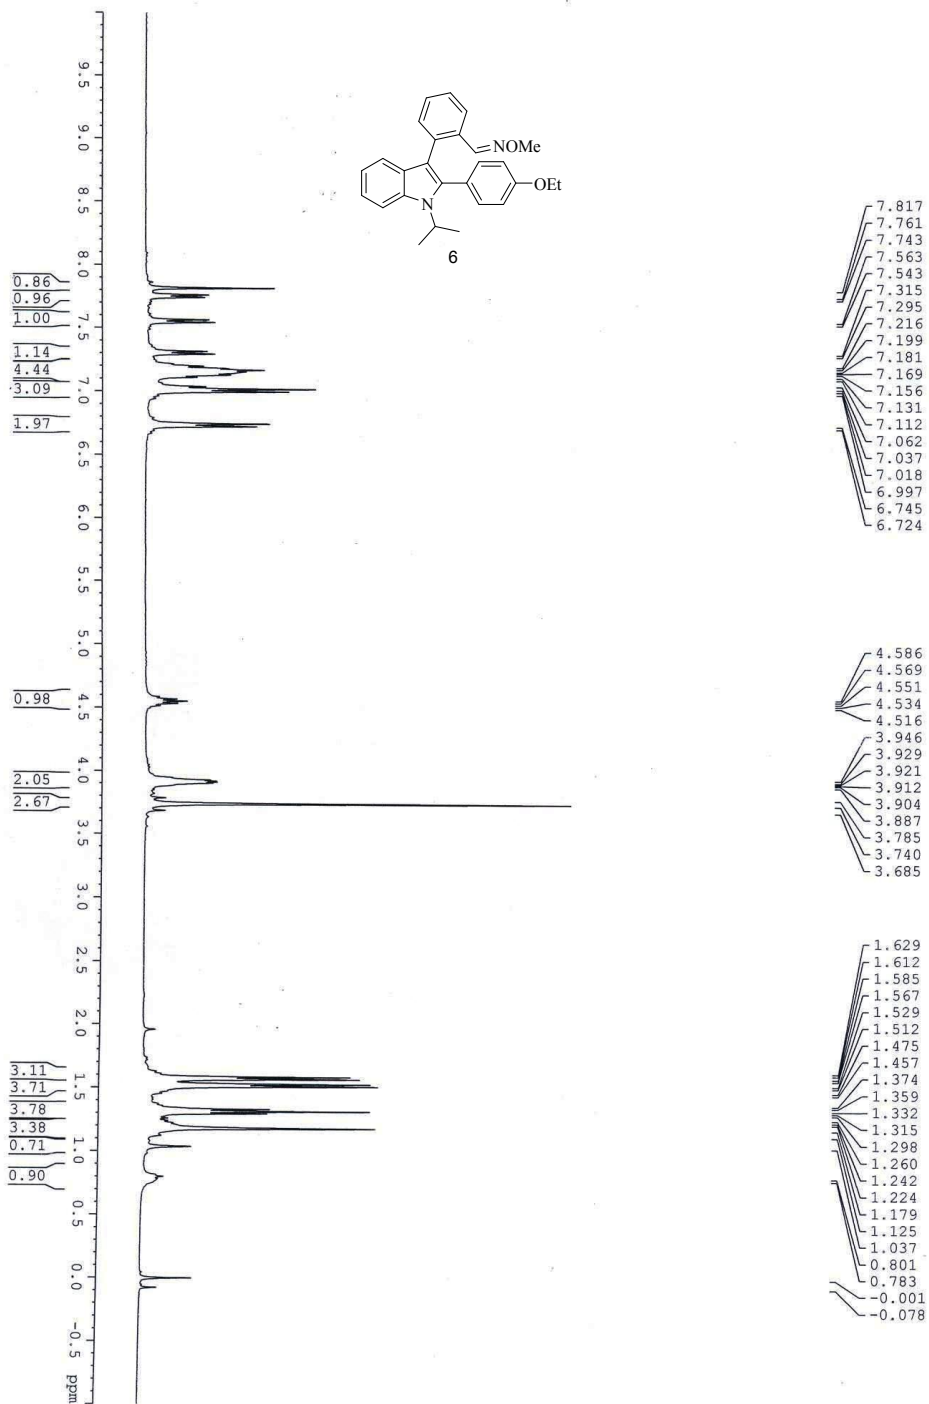

In-Isp-Ph

2-(2-(4-ethoxyphenyl)-1-isopropyl-1H-indol-3-yl)benzaldehyde O-methyl oxime (6):

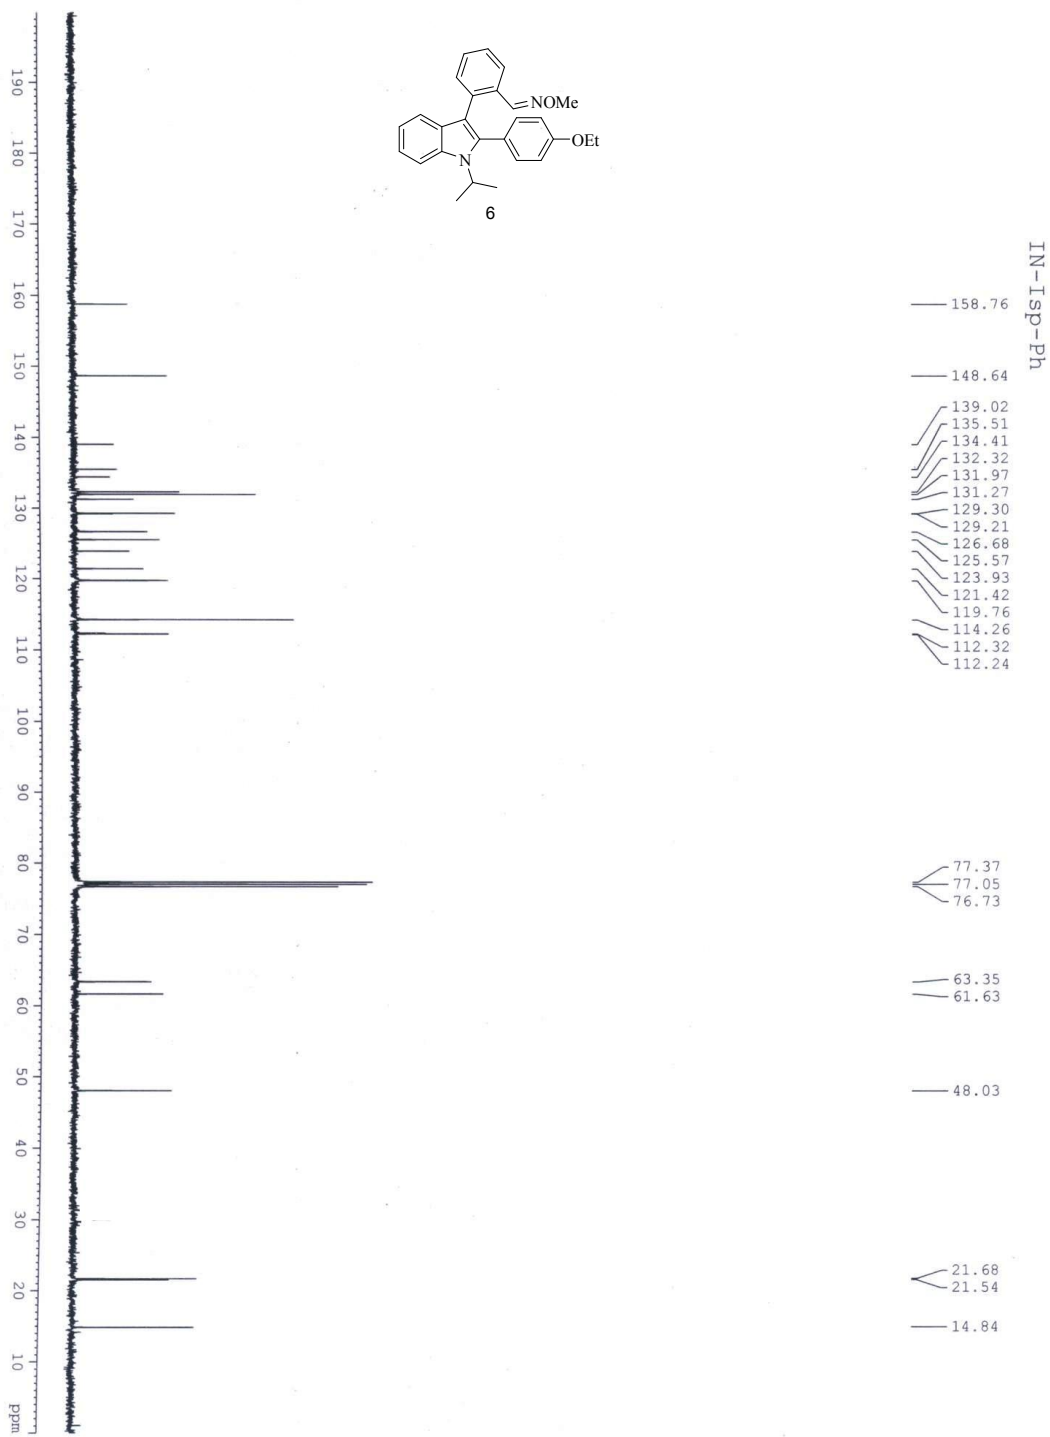

2-(1H-indol-1-yl)benzaldehyde O-methyl oxime (7a):

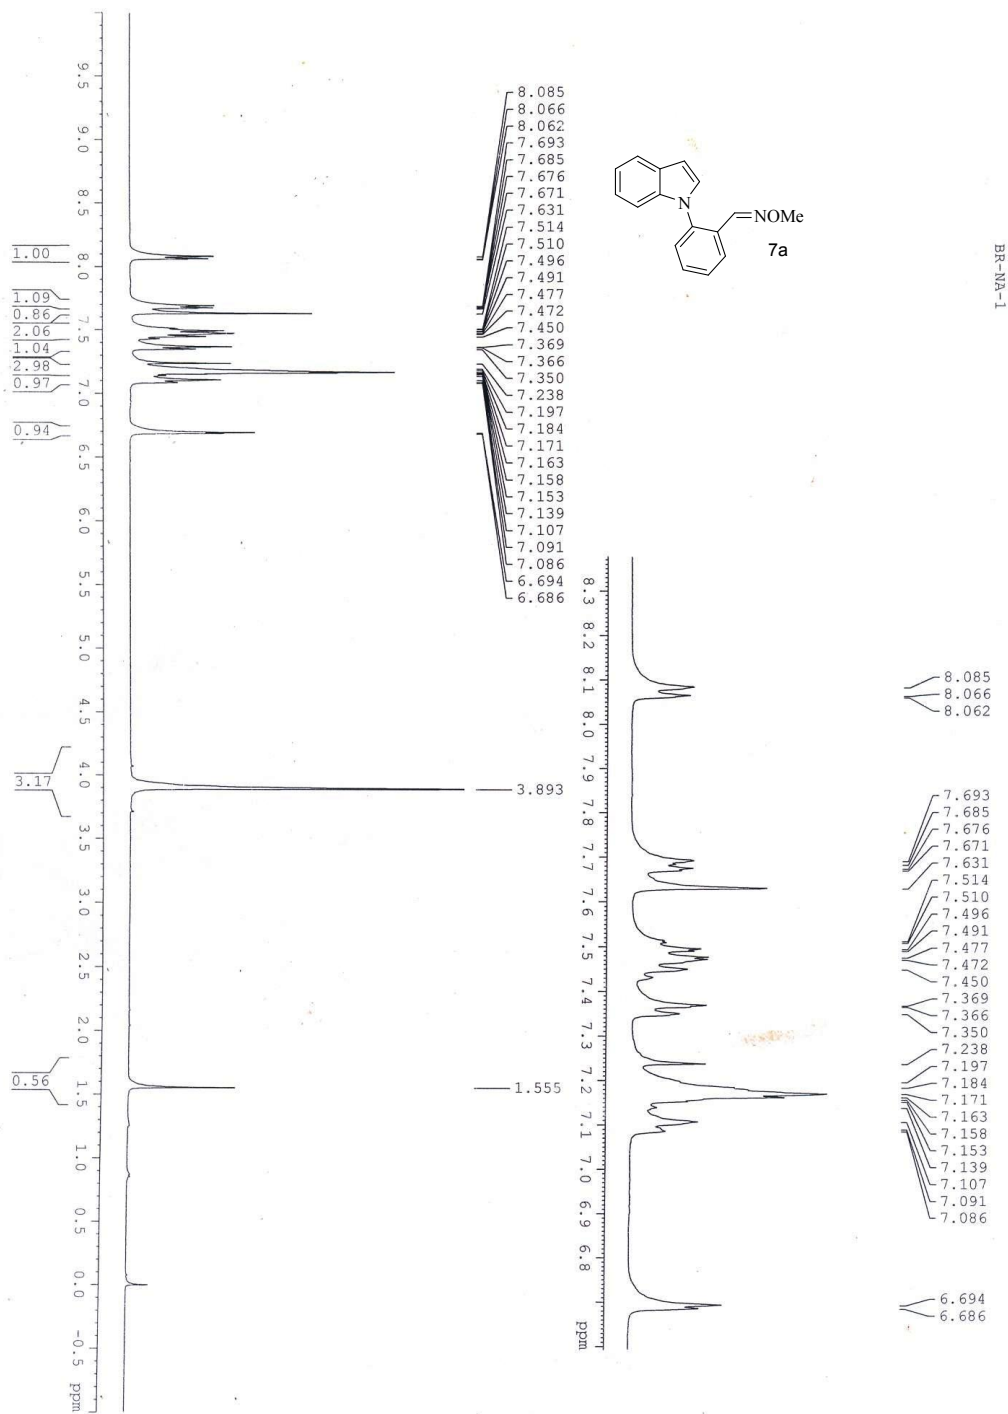

2-(1H-indol-1-yl)benzaldehyde O-methyl oxime (7a):

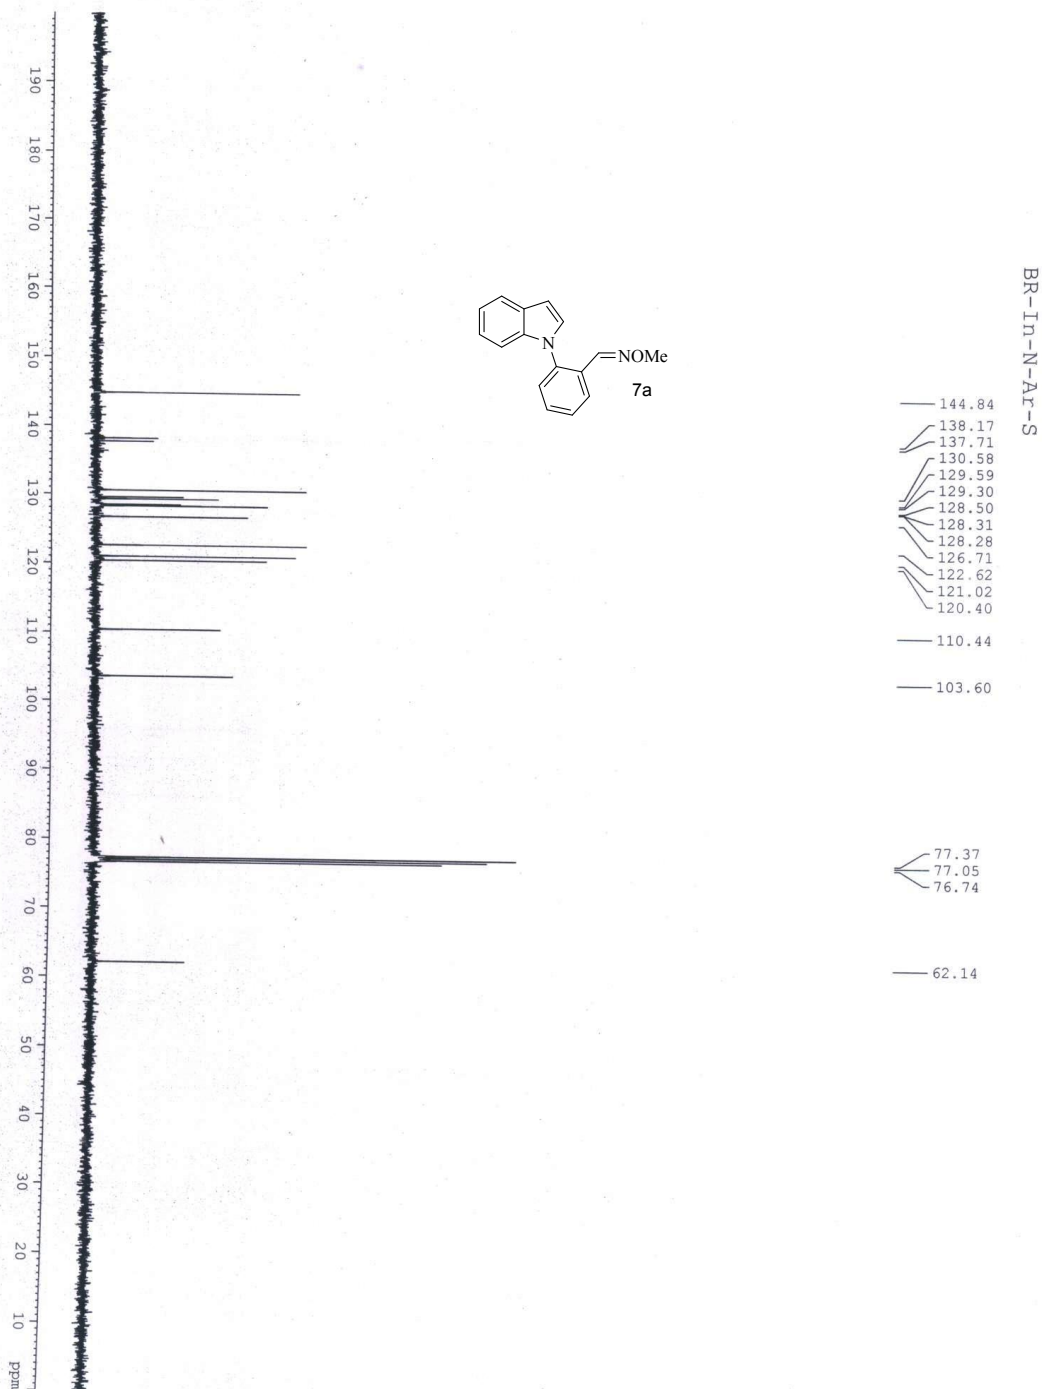

2-(5-methoxy-1H-indol-1-yl)benzaldehyde O-methyl oxime (7b):

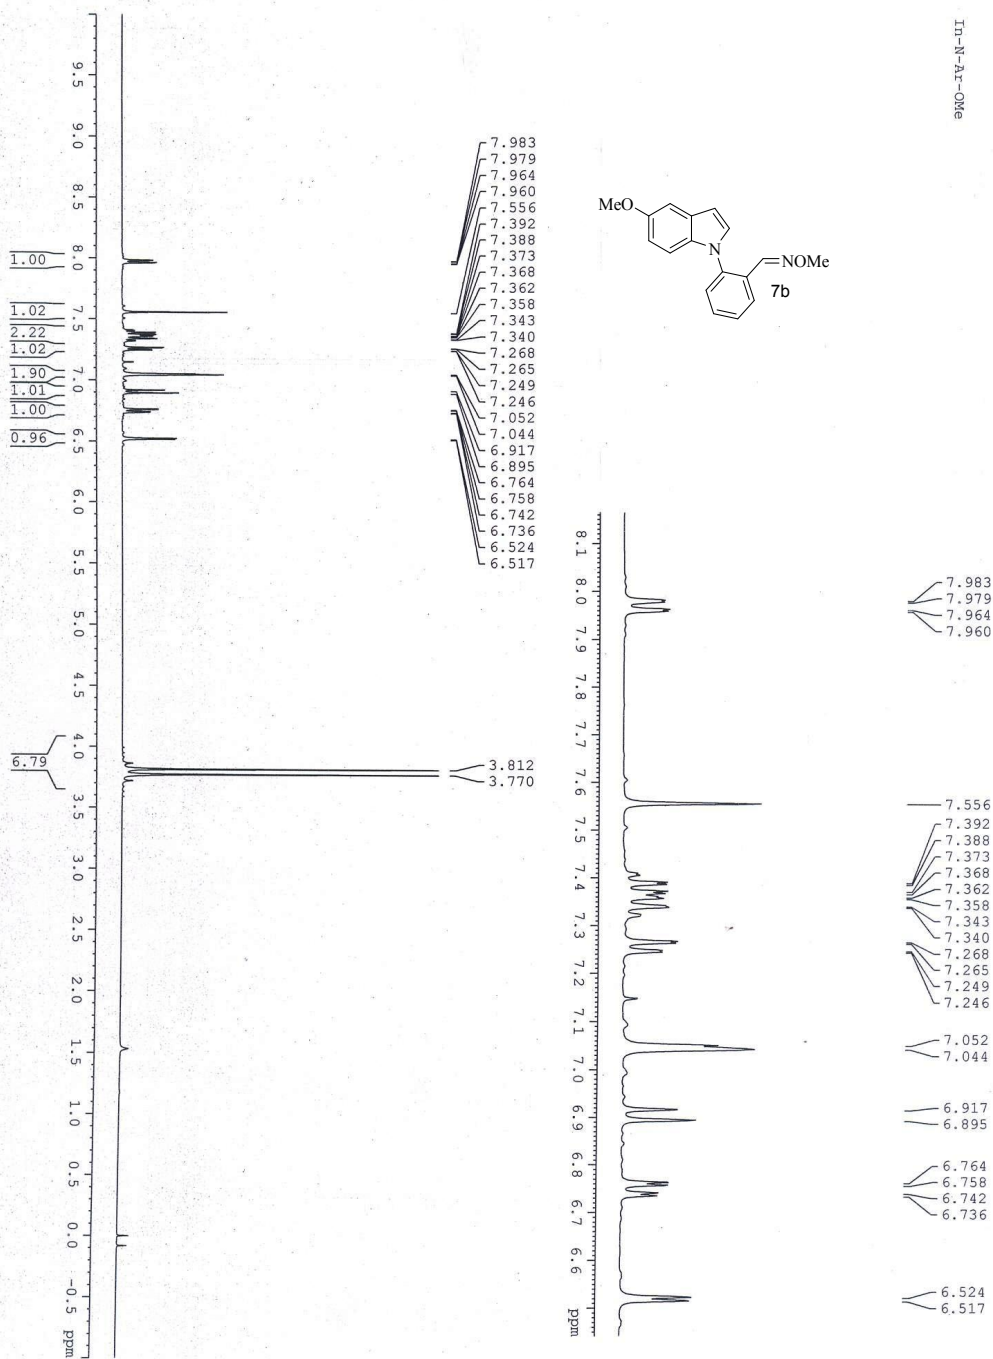

2-(5-methoxy-1H-indol-1-yl)benzaldehyde O-methyl oxime (7b):

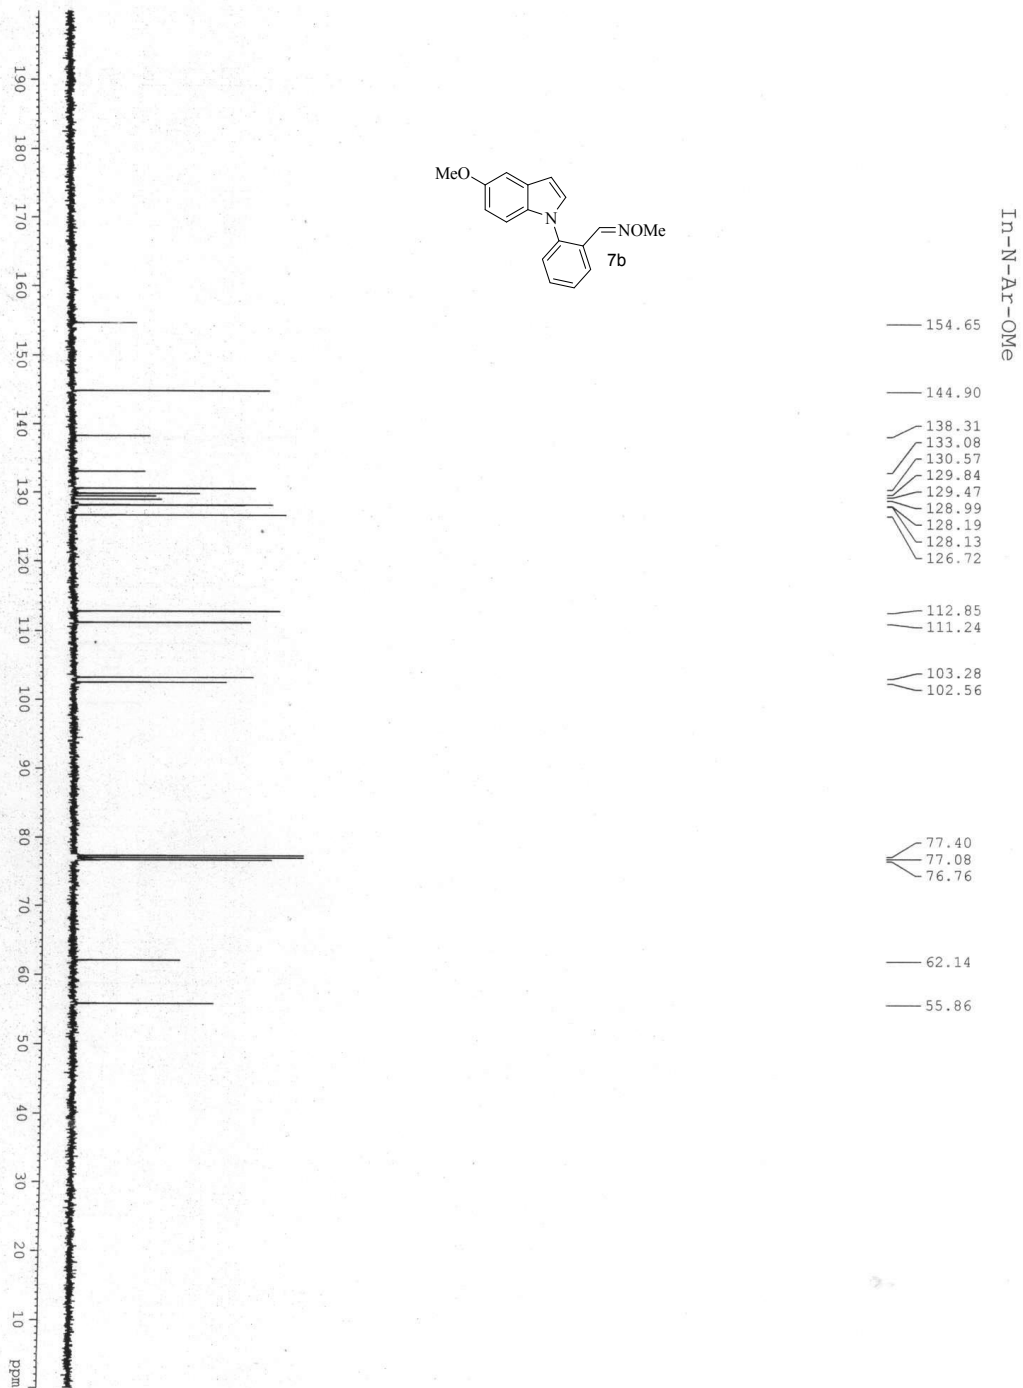

2-(3-phenyl-1H-indol-1-yl)benzaldehyde O-methyl oxime (7c):

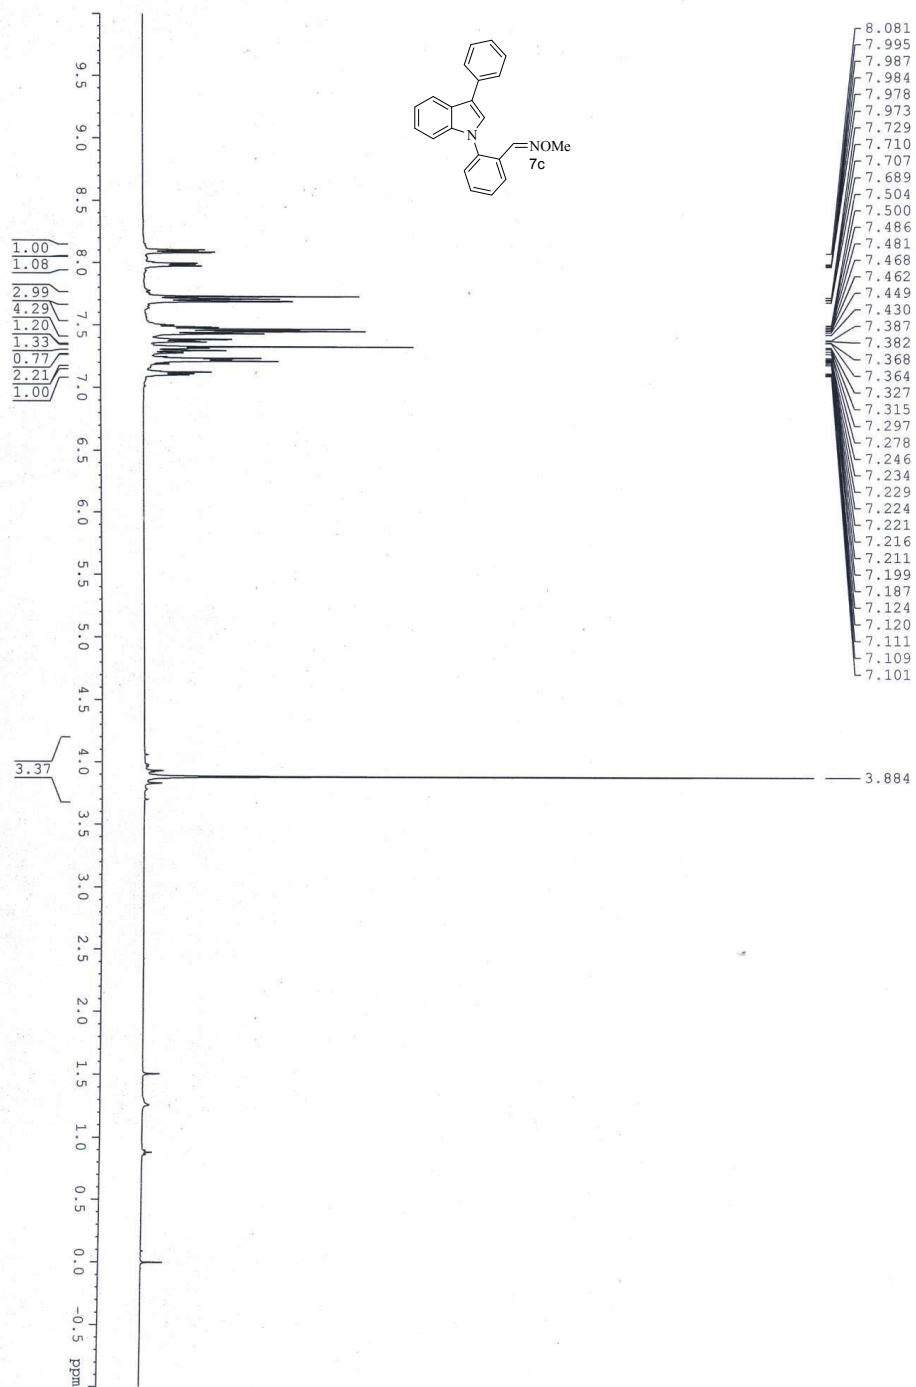

BR-1n-Ph-3-S



2-(3-phenyl-1H-indol-1-yl)benzaldehyde O-methyl oxime (7c):

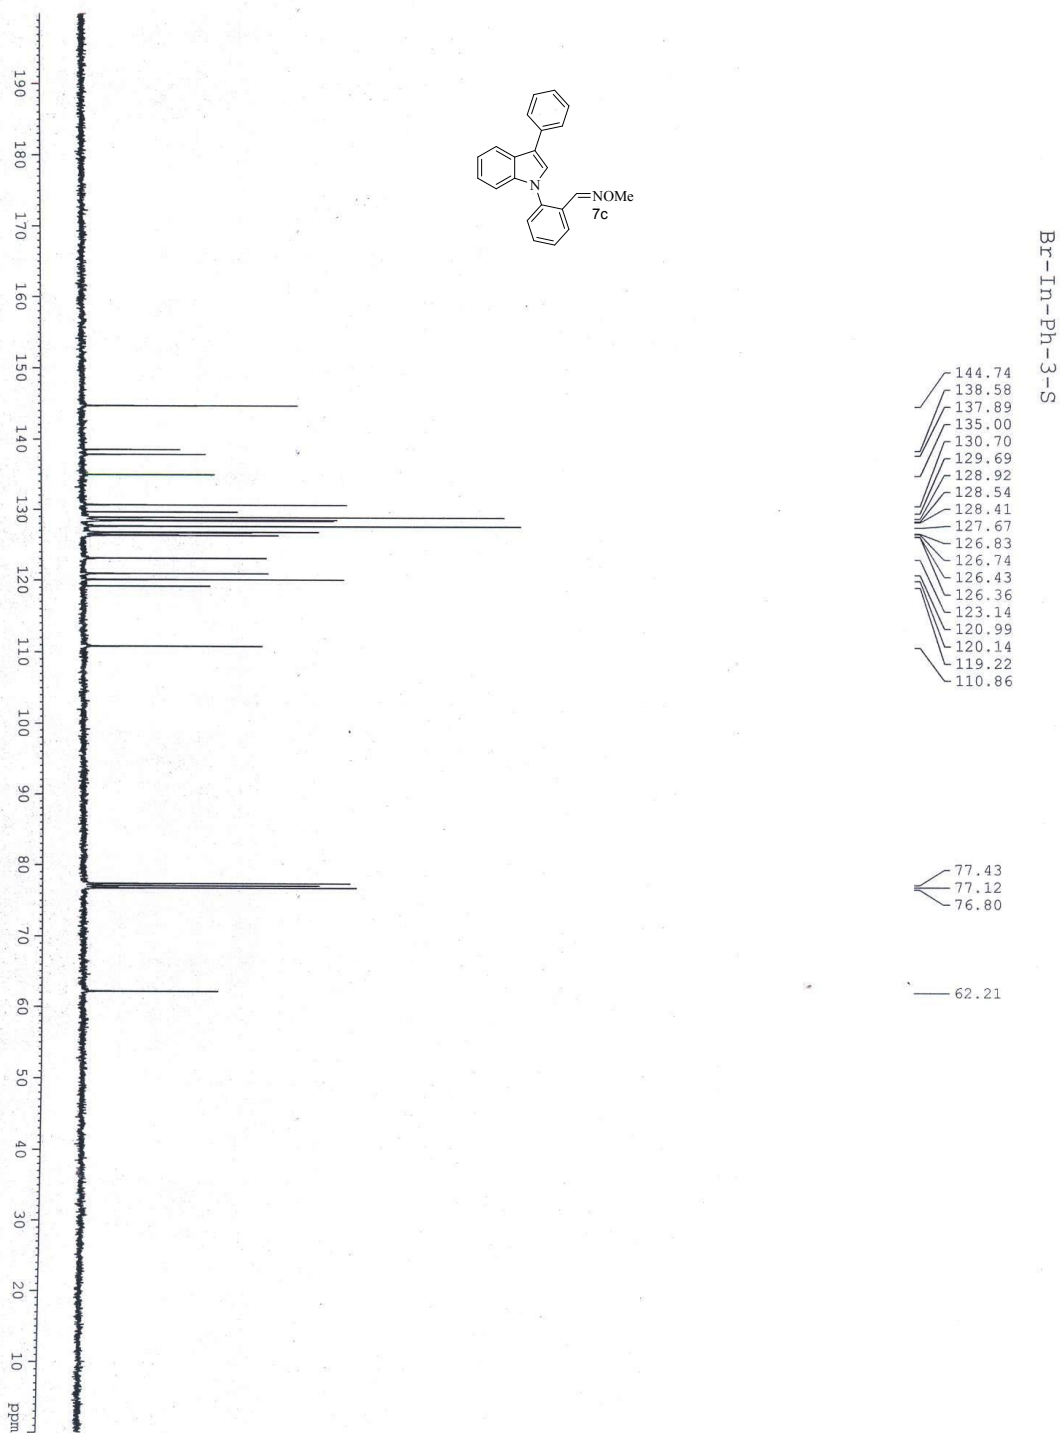

10H-indolo[1,2-a]indol-10-one O-methyl oxime (8a):

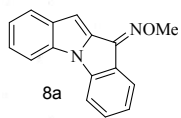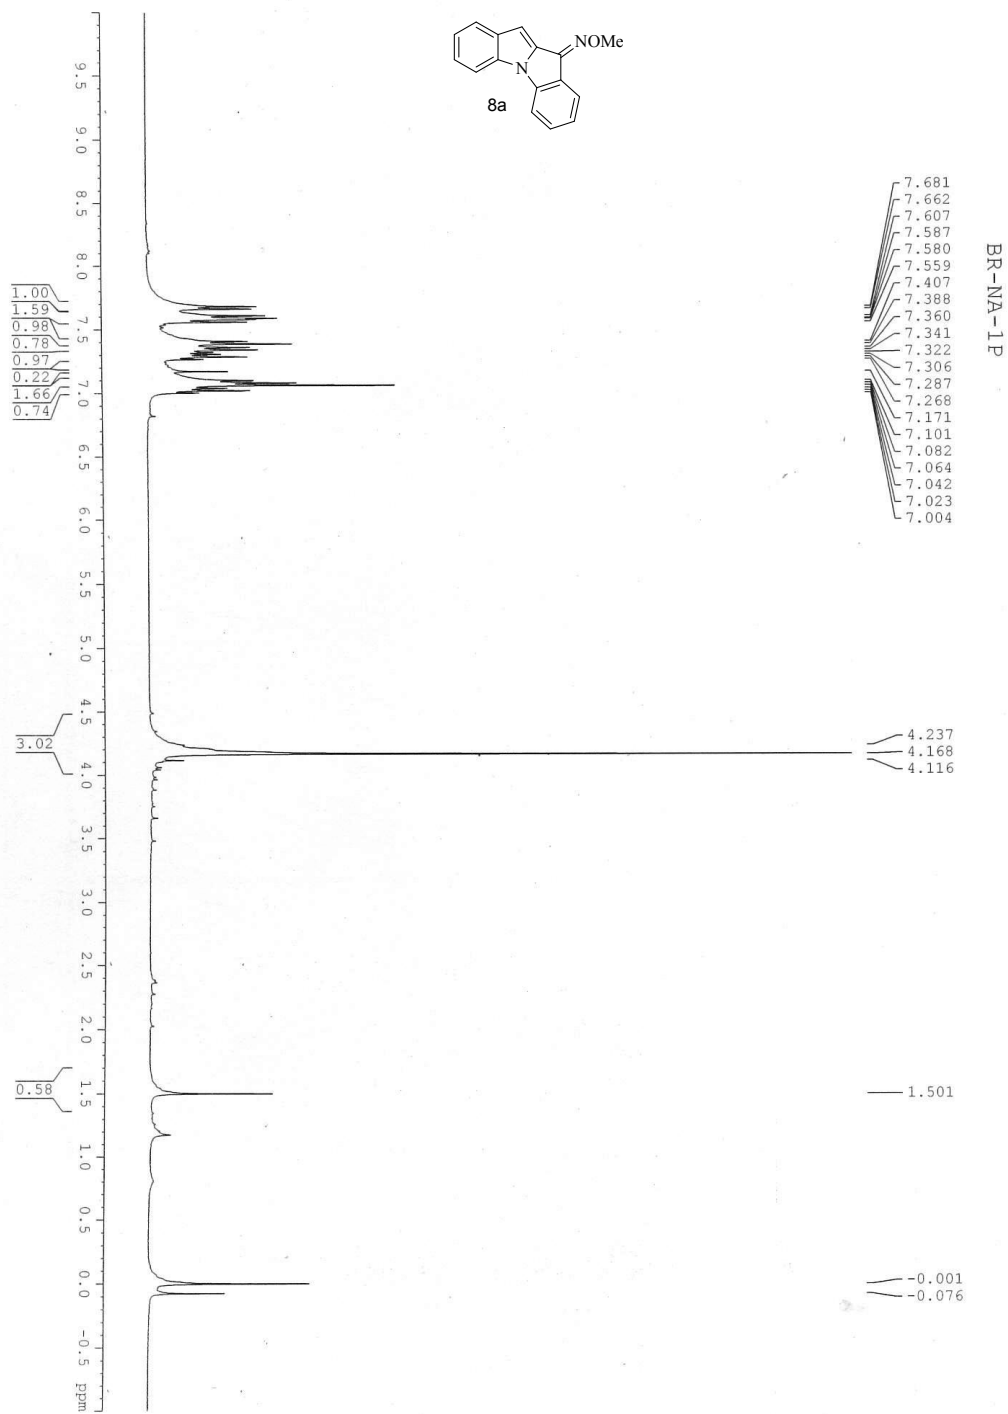

10H-indolo[1,2-a]indol-10-one O-methyl oxime (8a):

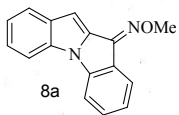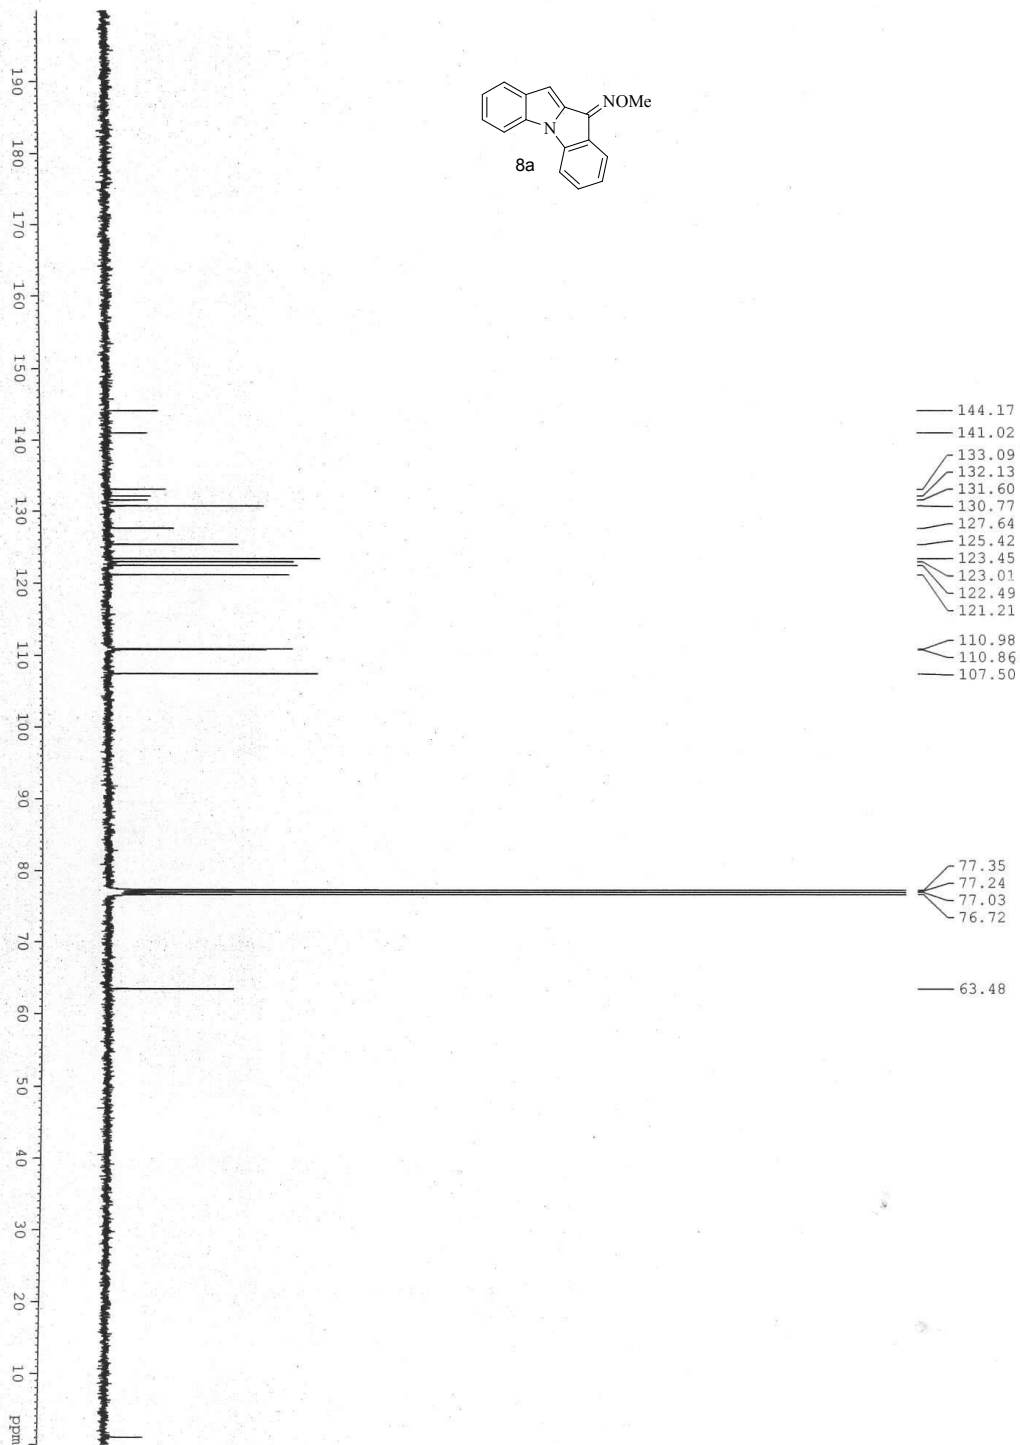

2-methoxy-10H-indolo[1,2-a]indol-10-one O-methyl oxime (8b):

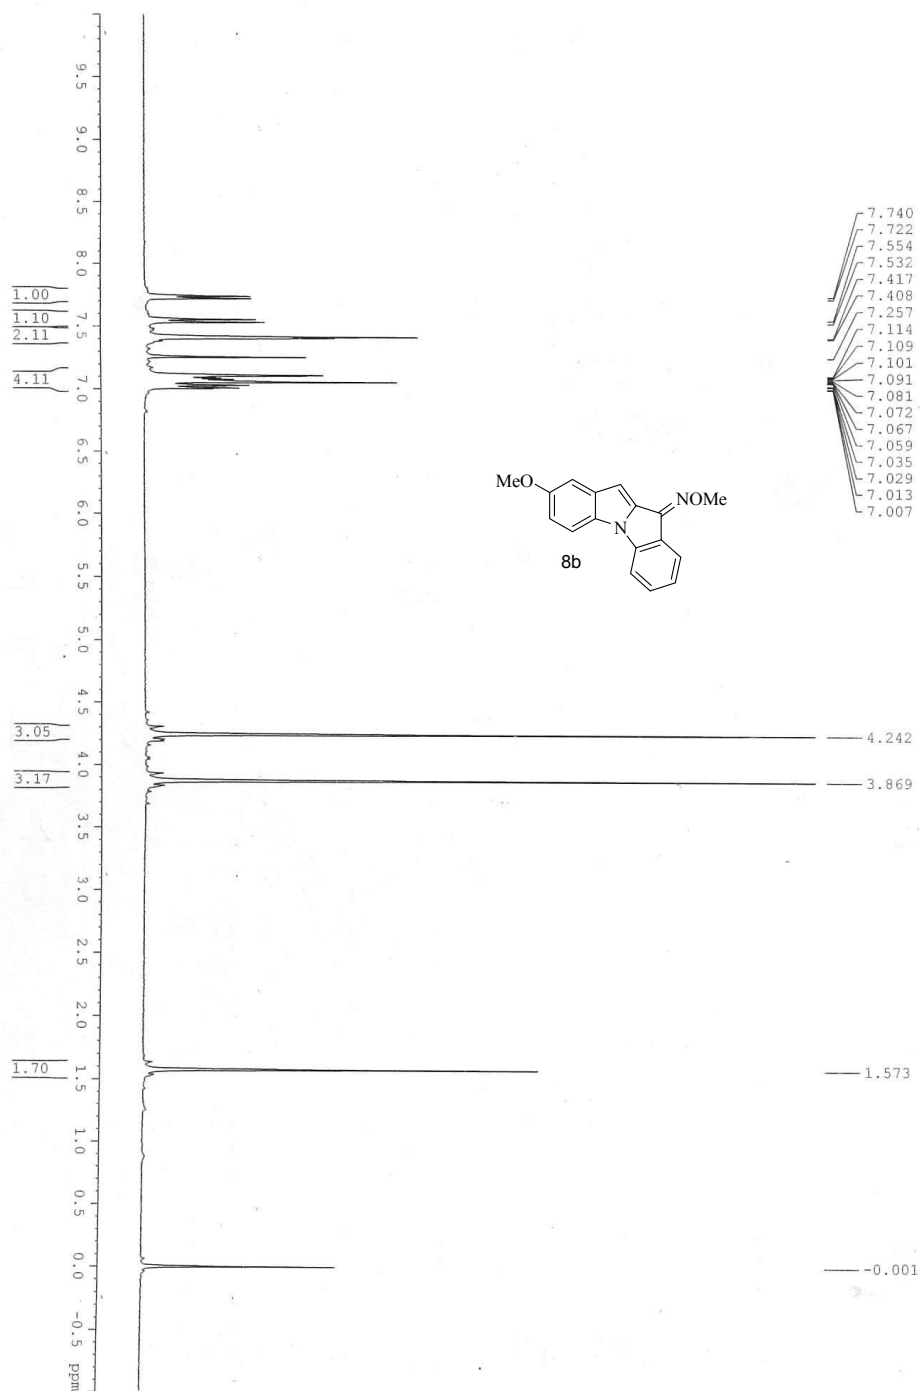

2-methoxy-10H-indolo[1,2-a]indol-10-one O-methyl oxime (8b):

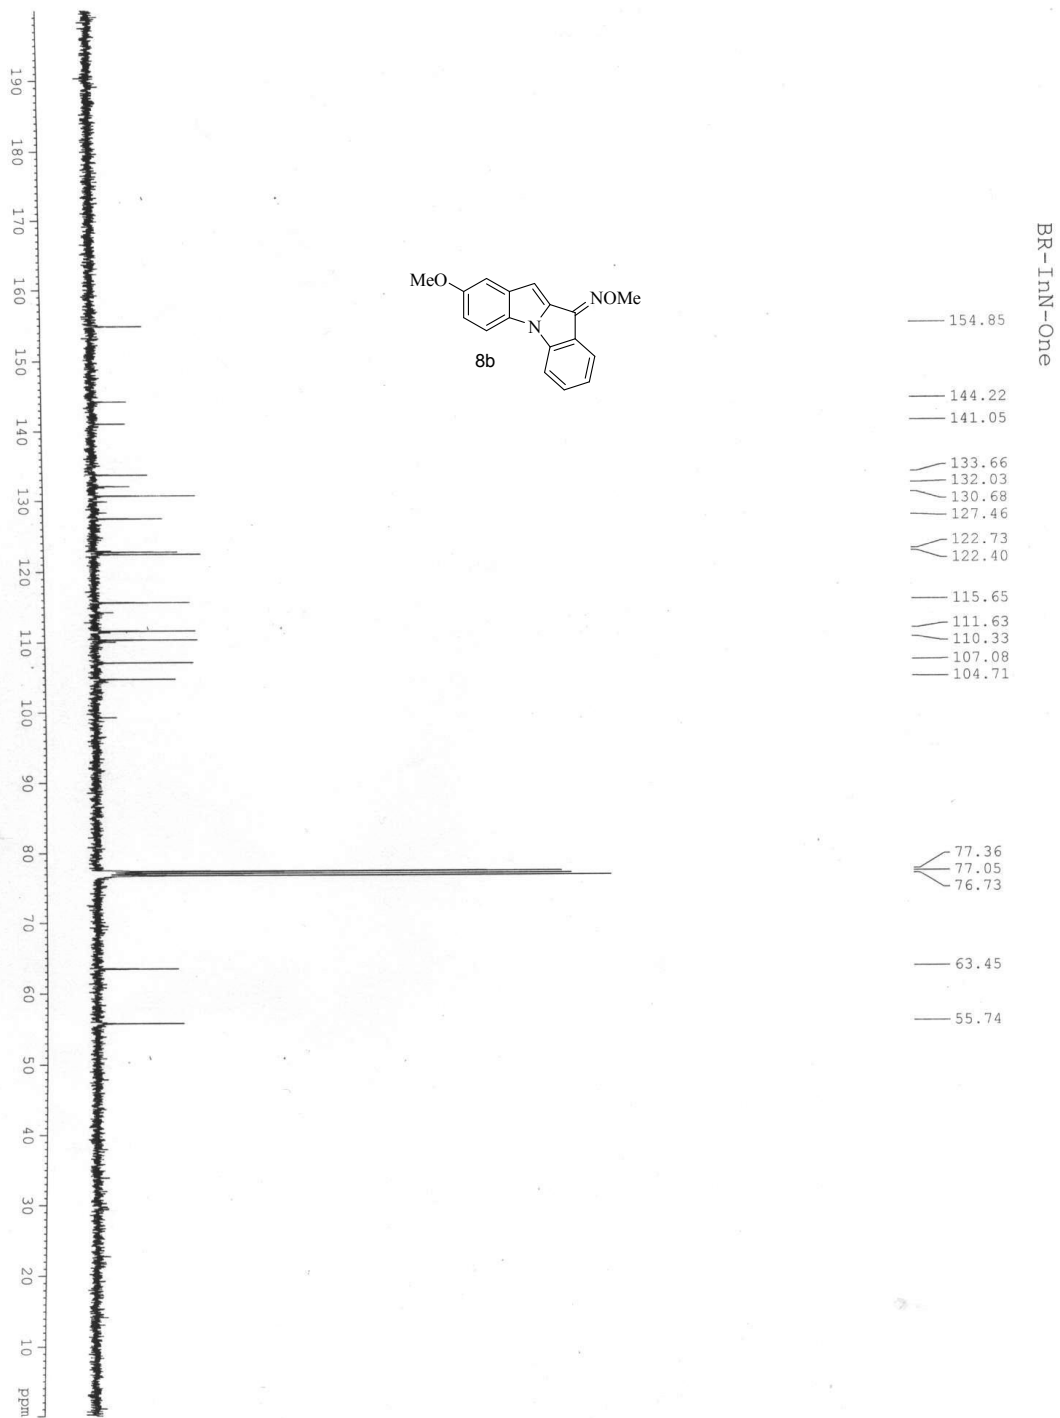

11-phenyl-10H-indolo[1,2-a]indol-10-one O-methyl oxime (8c):

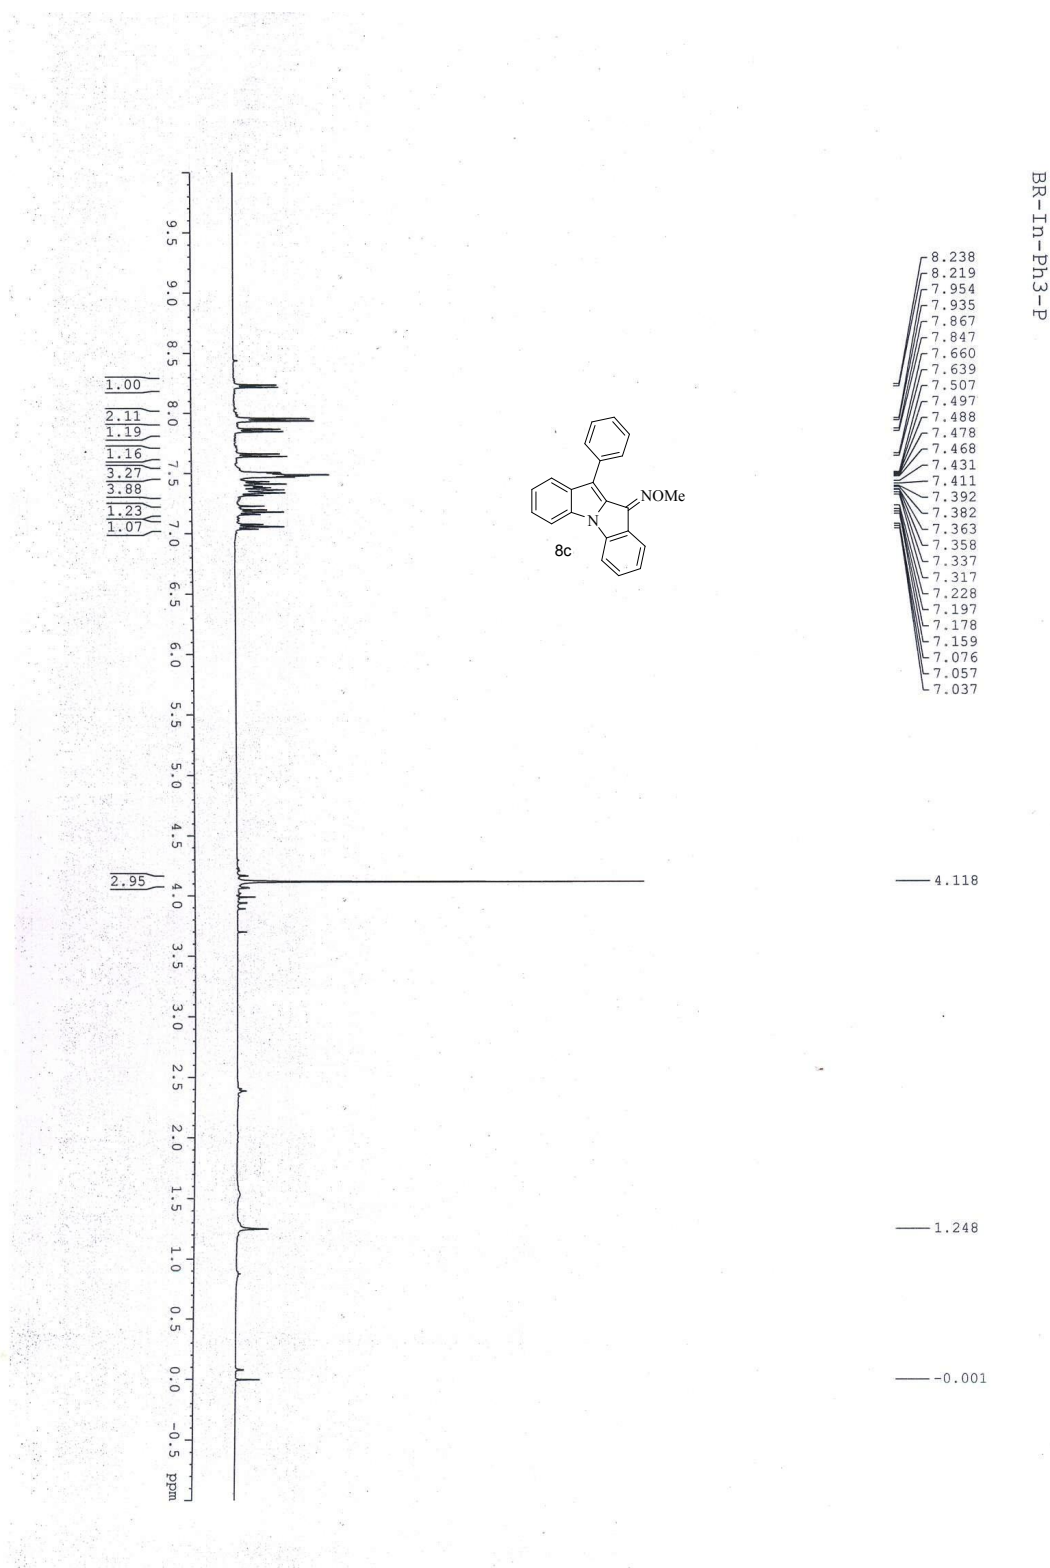

11-phenyl-10H-indolo[1,2-a]indol-10-one O-methyl oxime (8c):

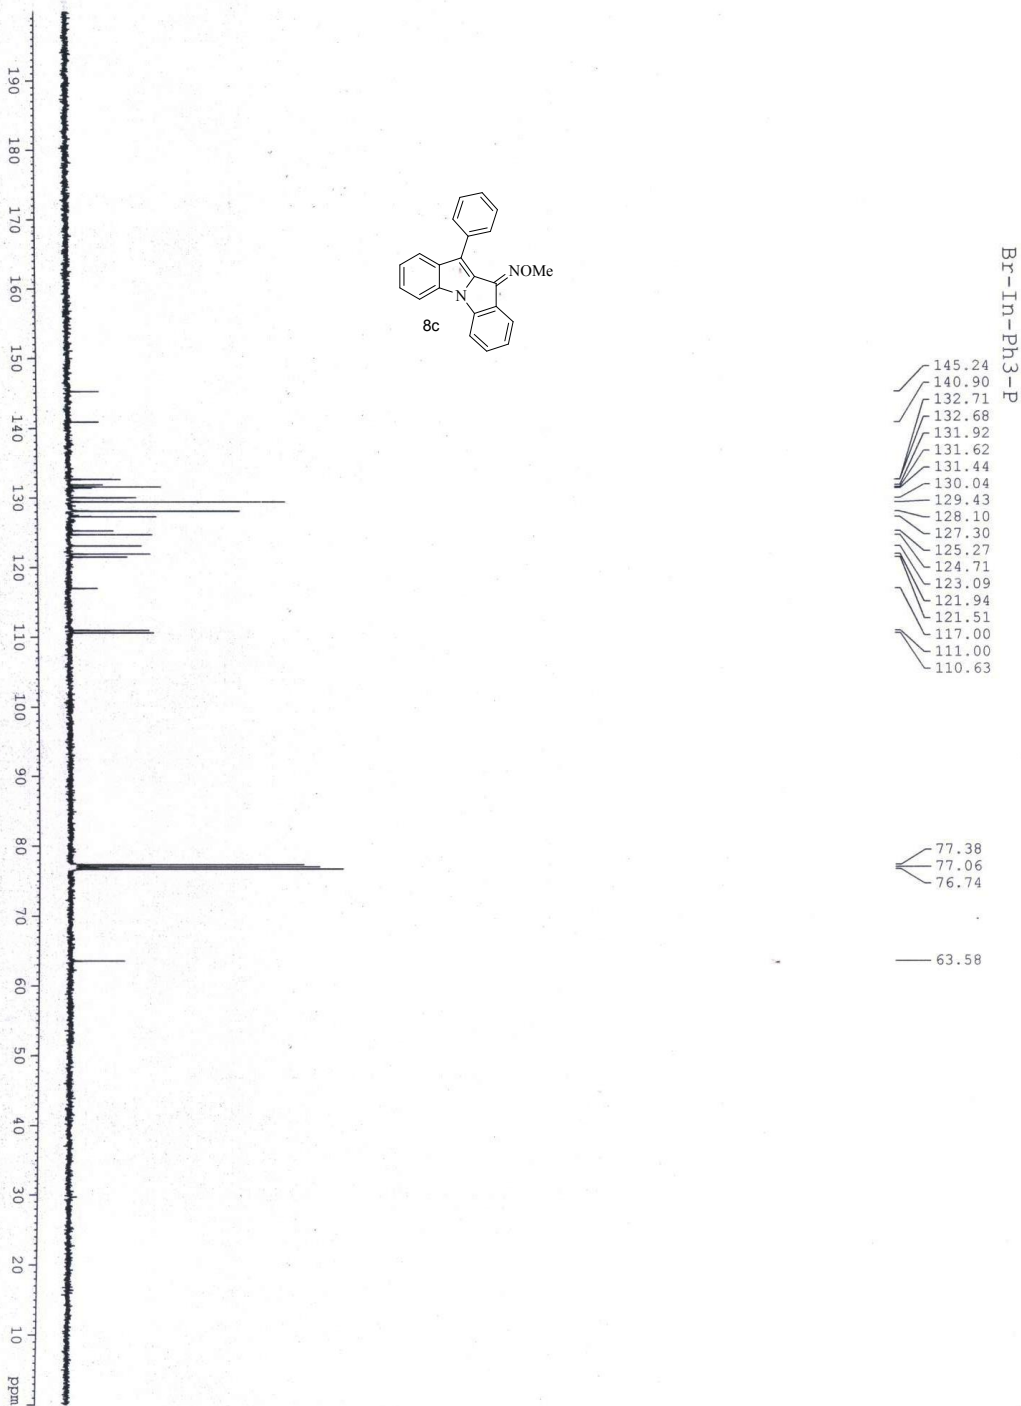

5-methylindeno[1,2-b]indol-10(5H)-one (9a):

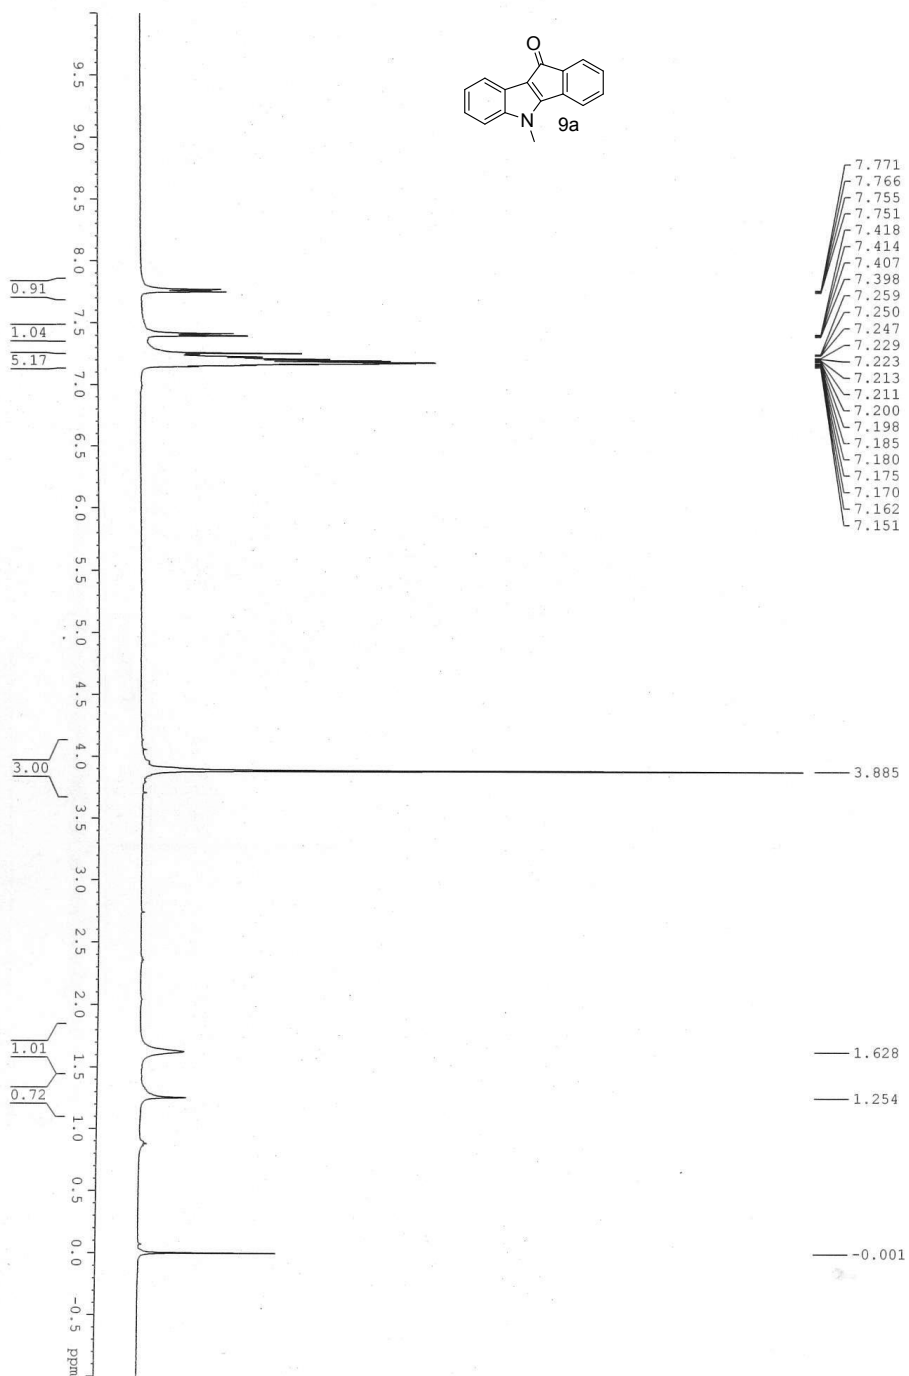

BRBR-SH-Ke



5-methylindeno[1,2-b]indol-10(5H)-one (9a):

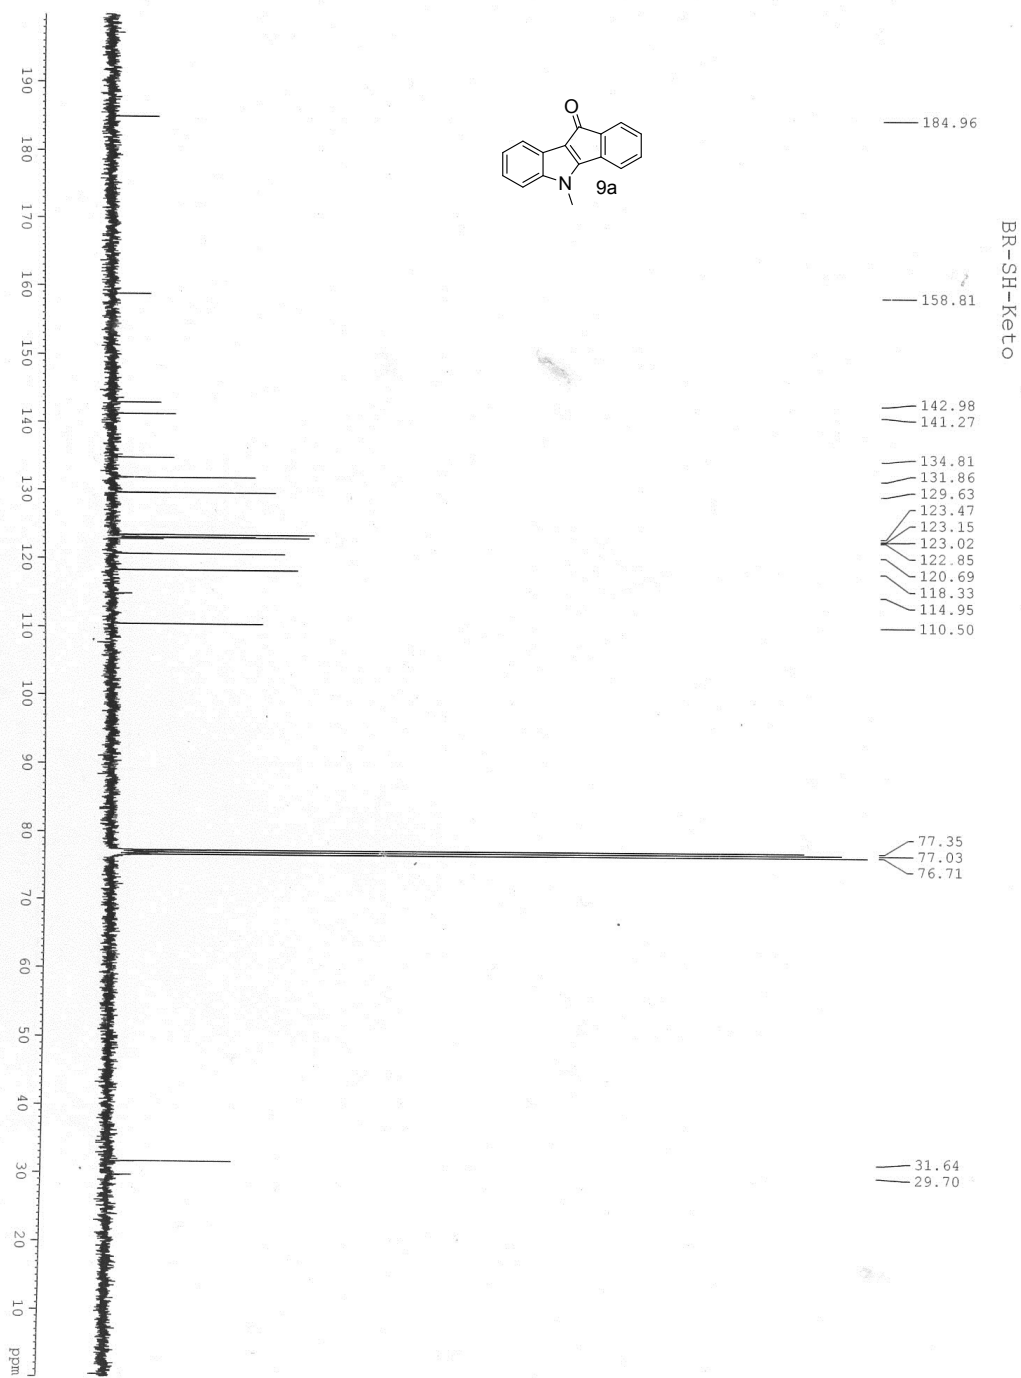

10-methylindeno[2',1':4,5]pyrrolo[2,3-b]pyridin-5(10H)-one (9b):

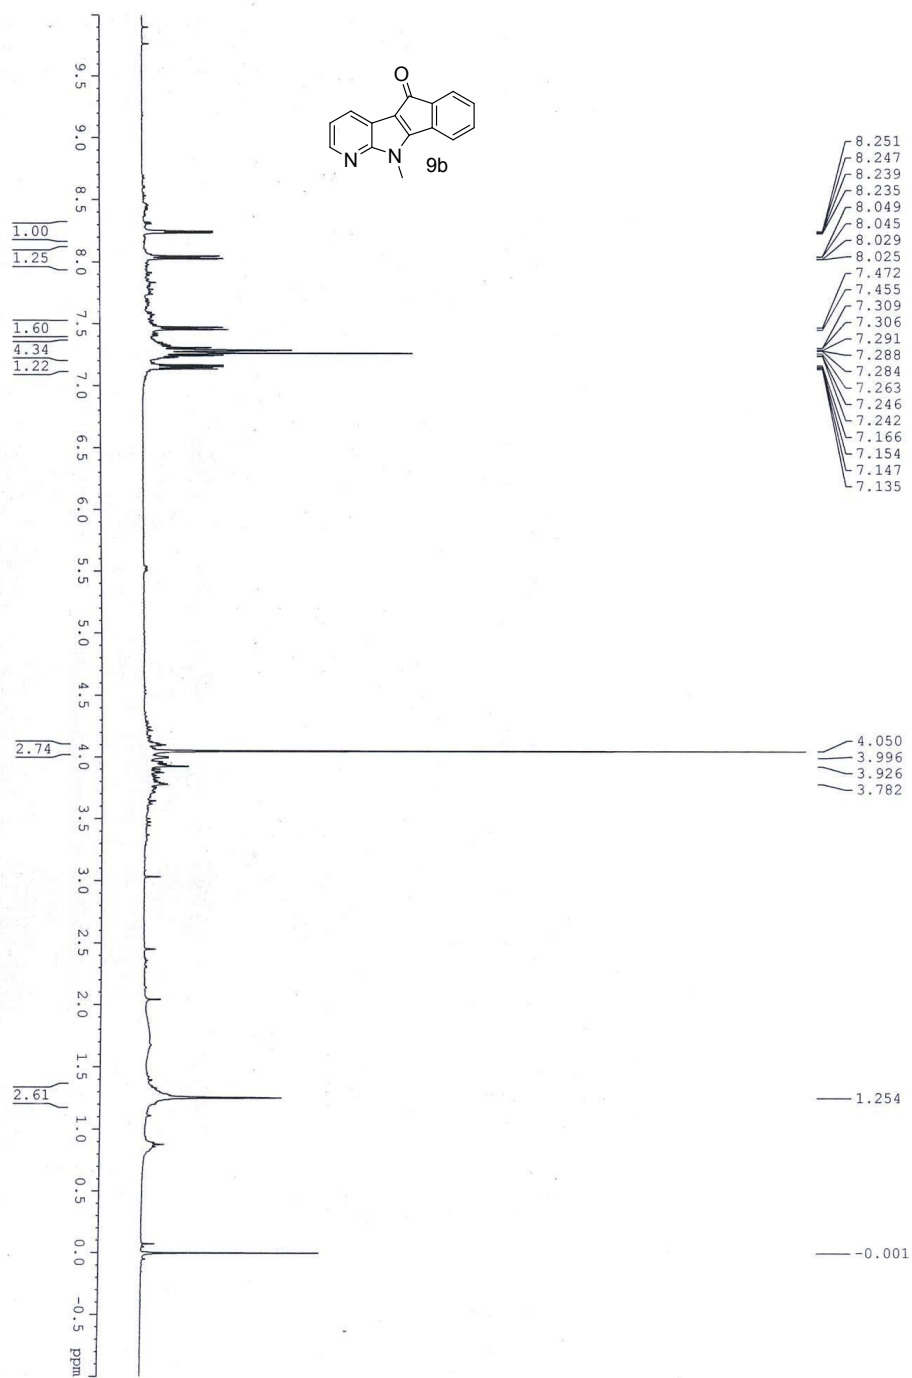

Aza-Keto

10-methylindeno[2',1':4,5]pyrrolo[2,3-b]pyridin-5(10H)-one (9b):

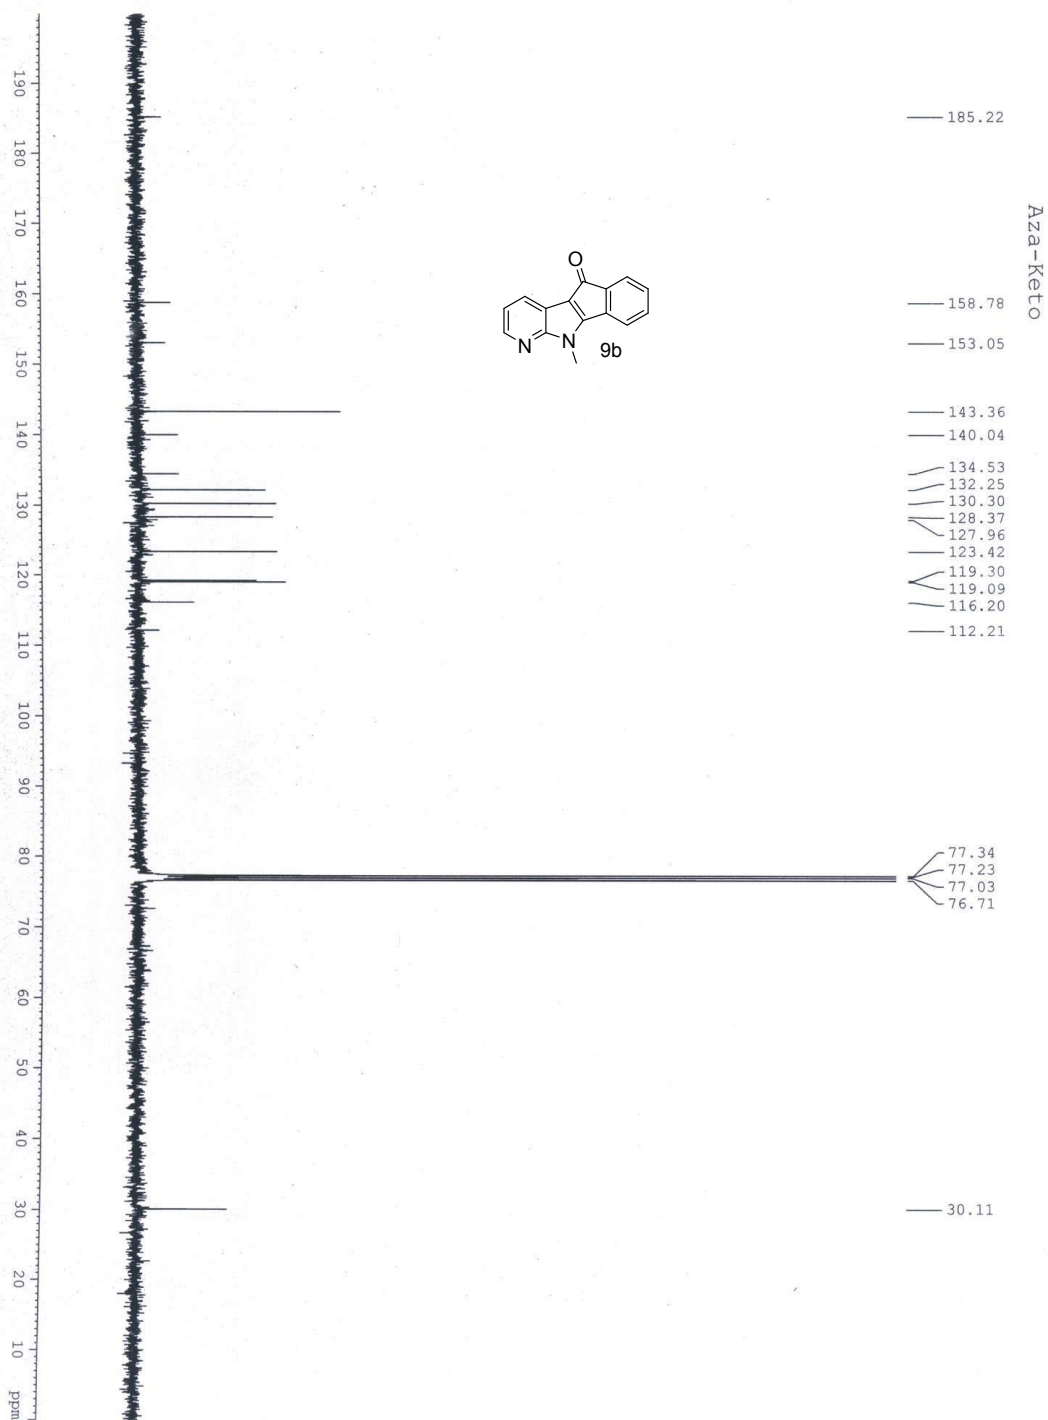

2-methoxy-10H-indolo[1,2-a]indol-10-one (9c):

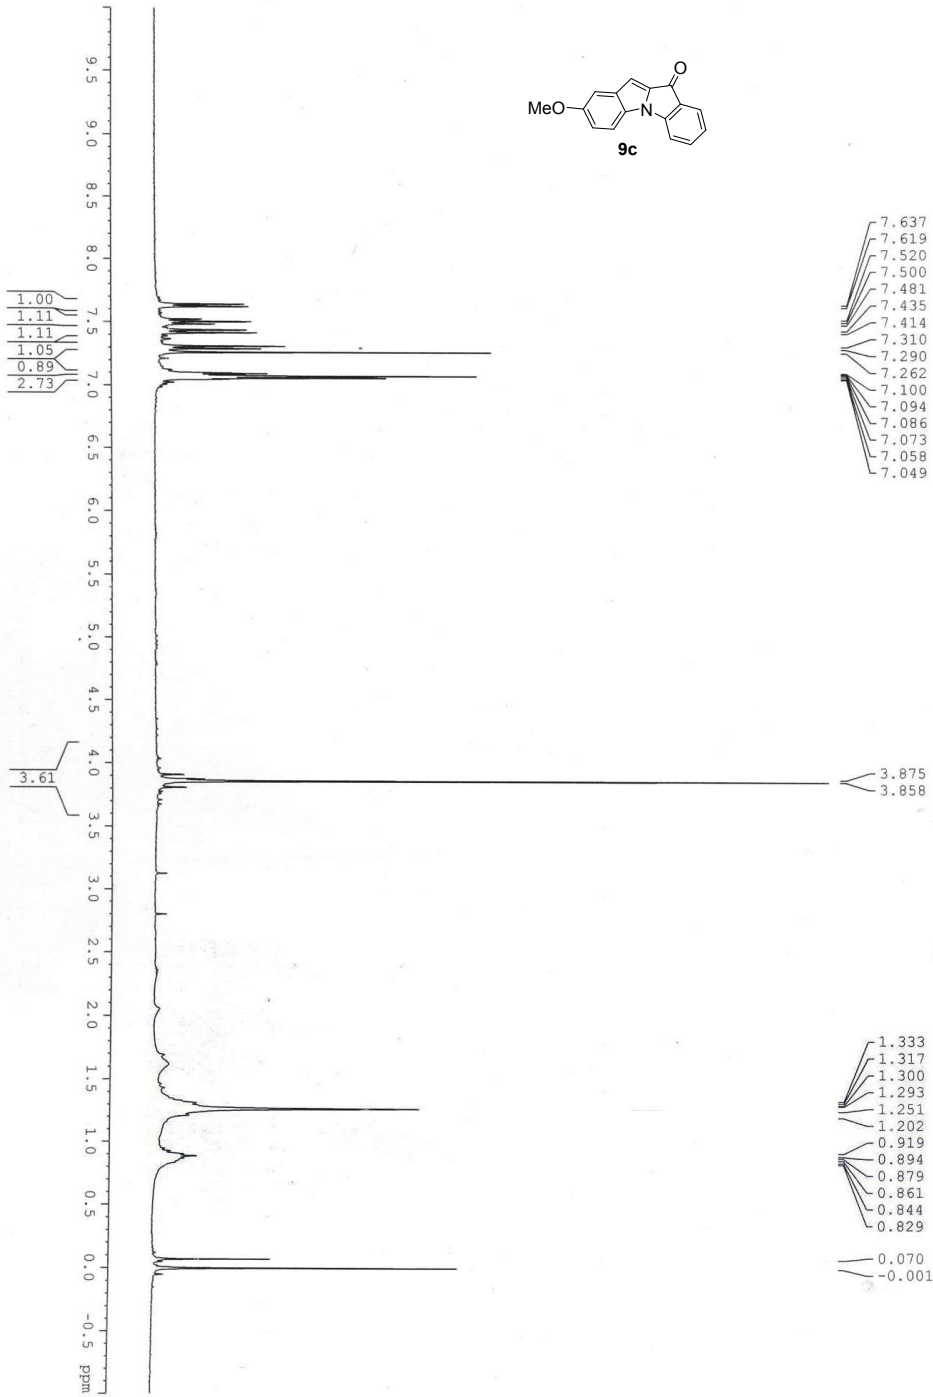

OMe-Keto

2-methoxy-10H-indolo[1,2-a]indol-10-one (9c):

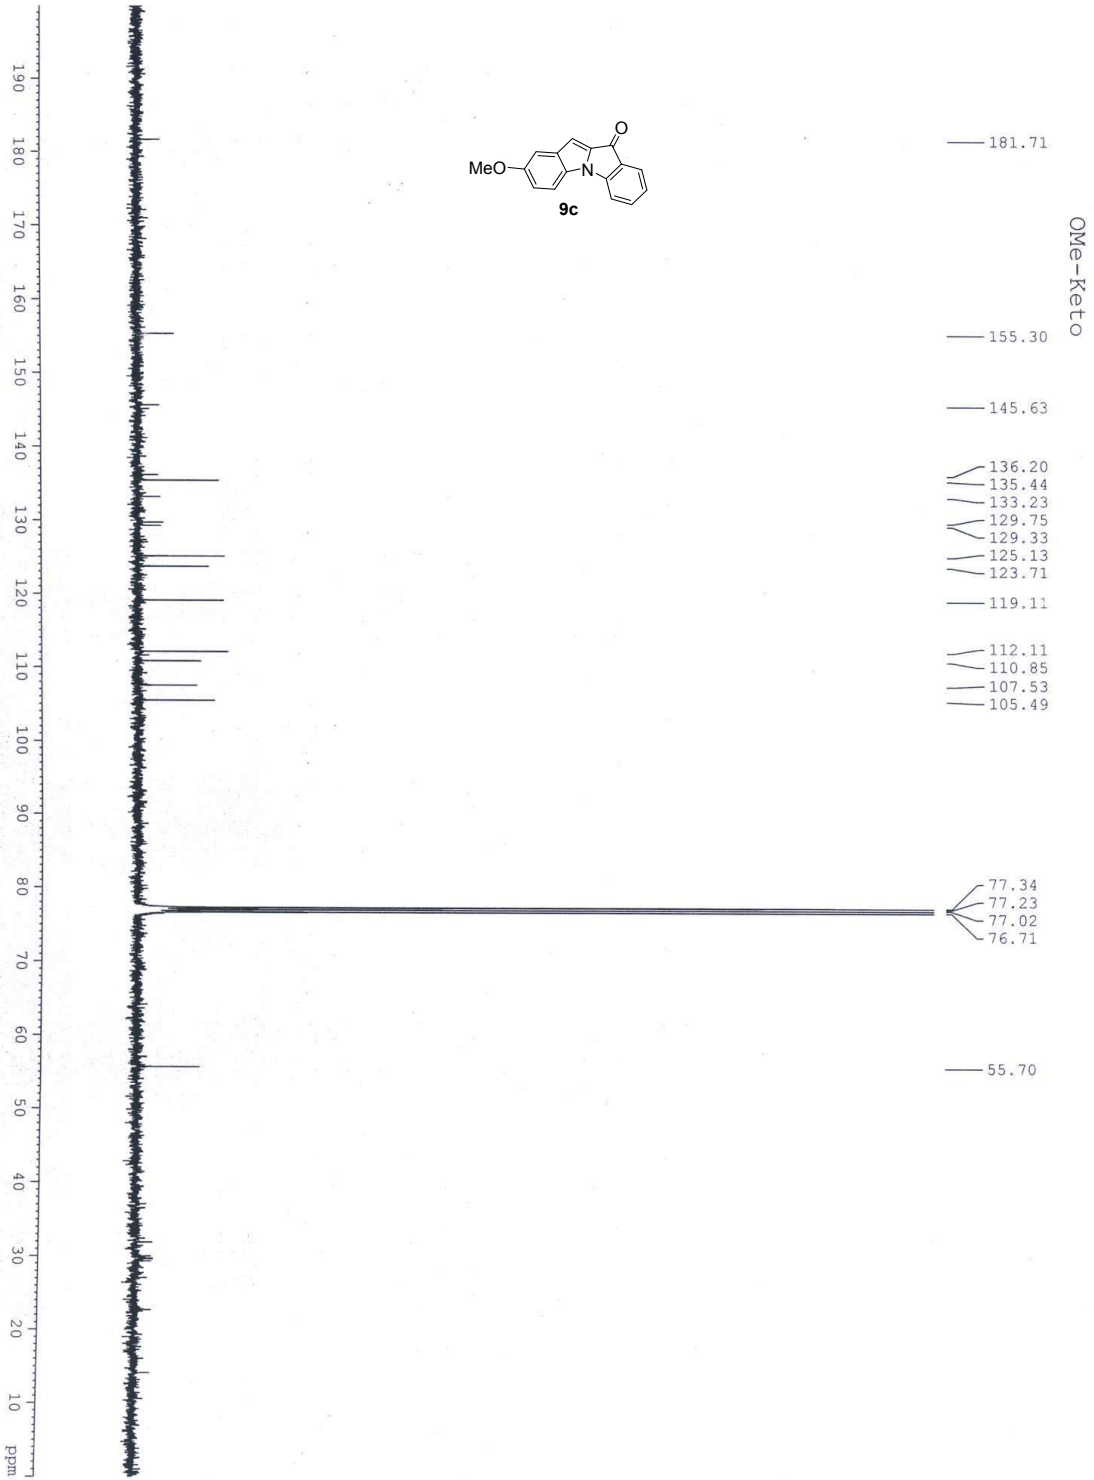

Mass spectra of compound 3a and 4a:

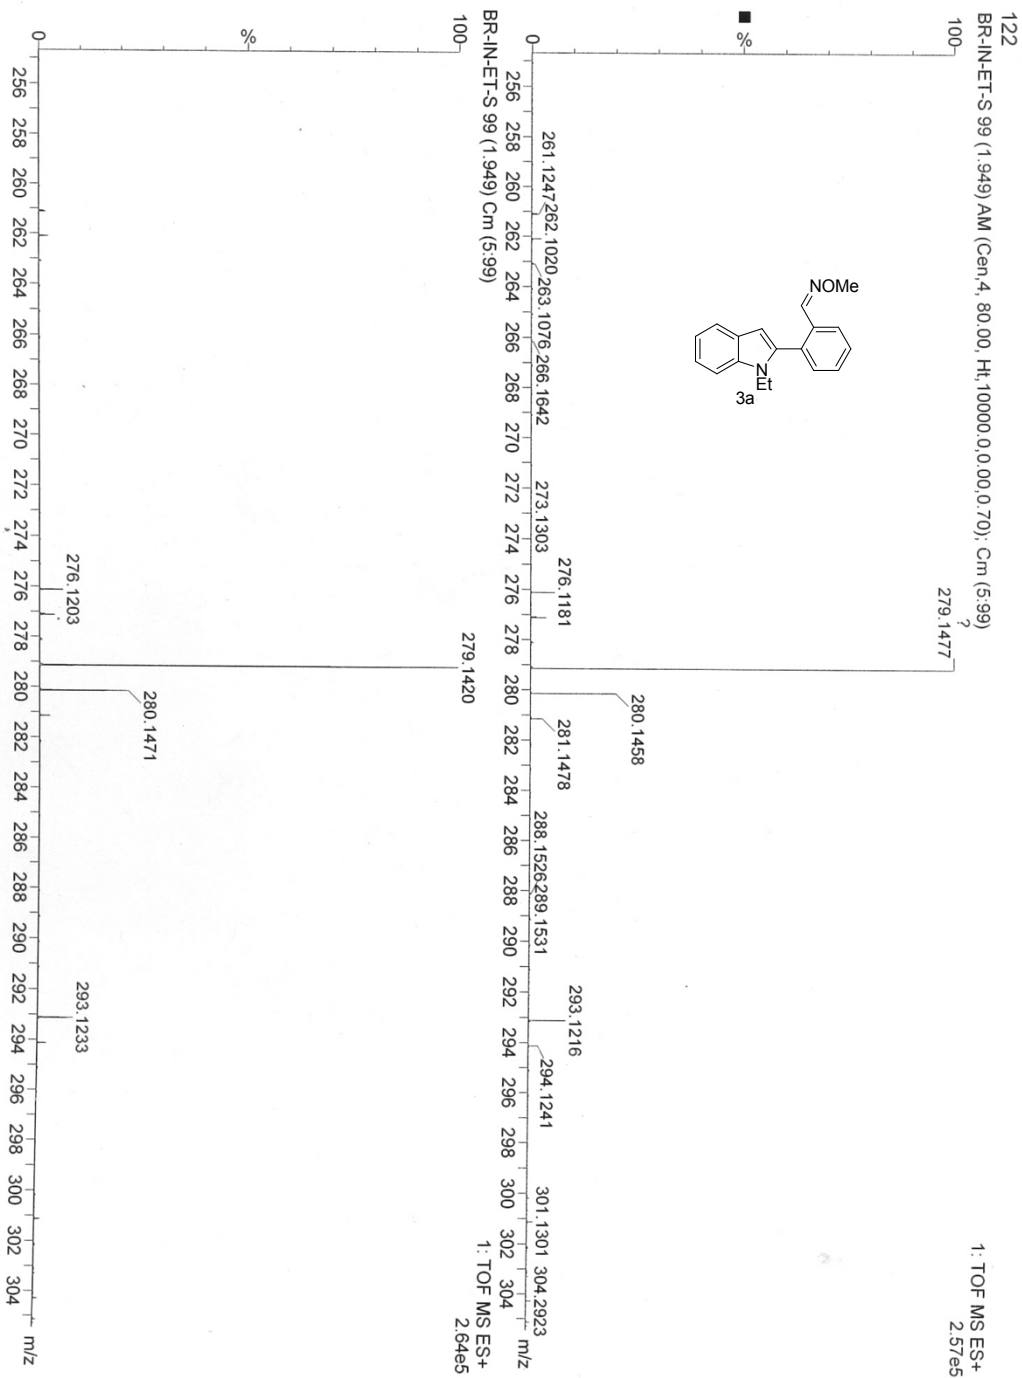

Supplement: c4ra16661b1.pdf [file c4ra16661b1.pdf]
